# Supplementary material
Source: PubMed Central journal article supplement (PMC3405184)
Supplement: NIHMS365062-supplement-1.pdf [file NIHMS365062-supplement-1.pdf]

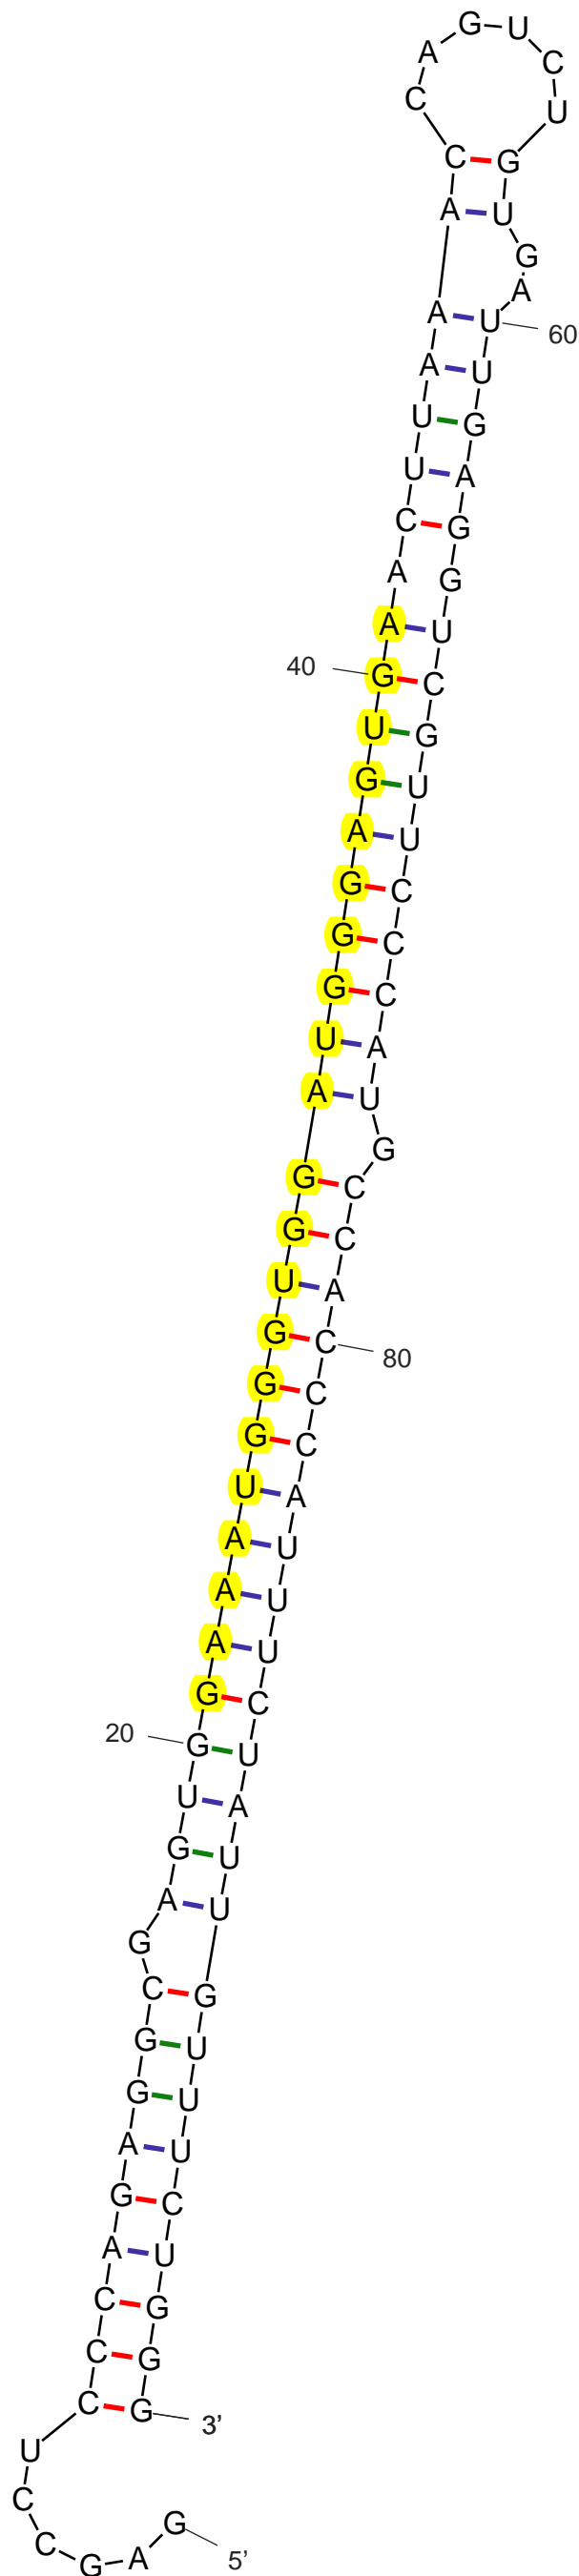

$dG = -53.80$  [initially -53.80] hbr-cand02

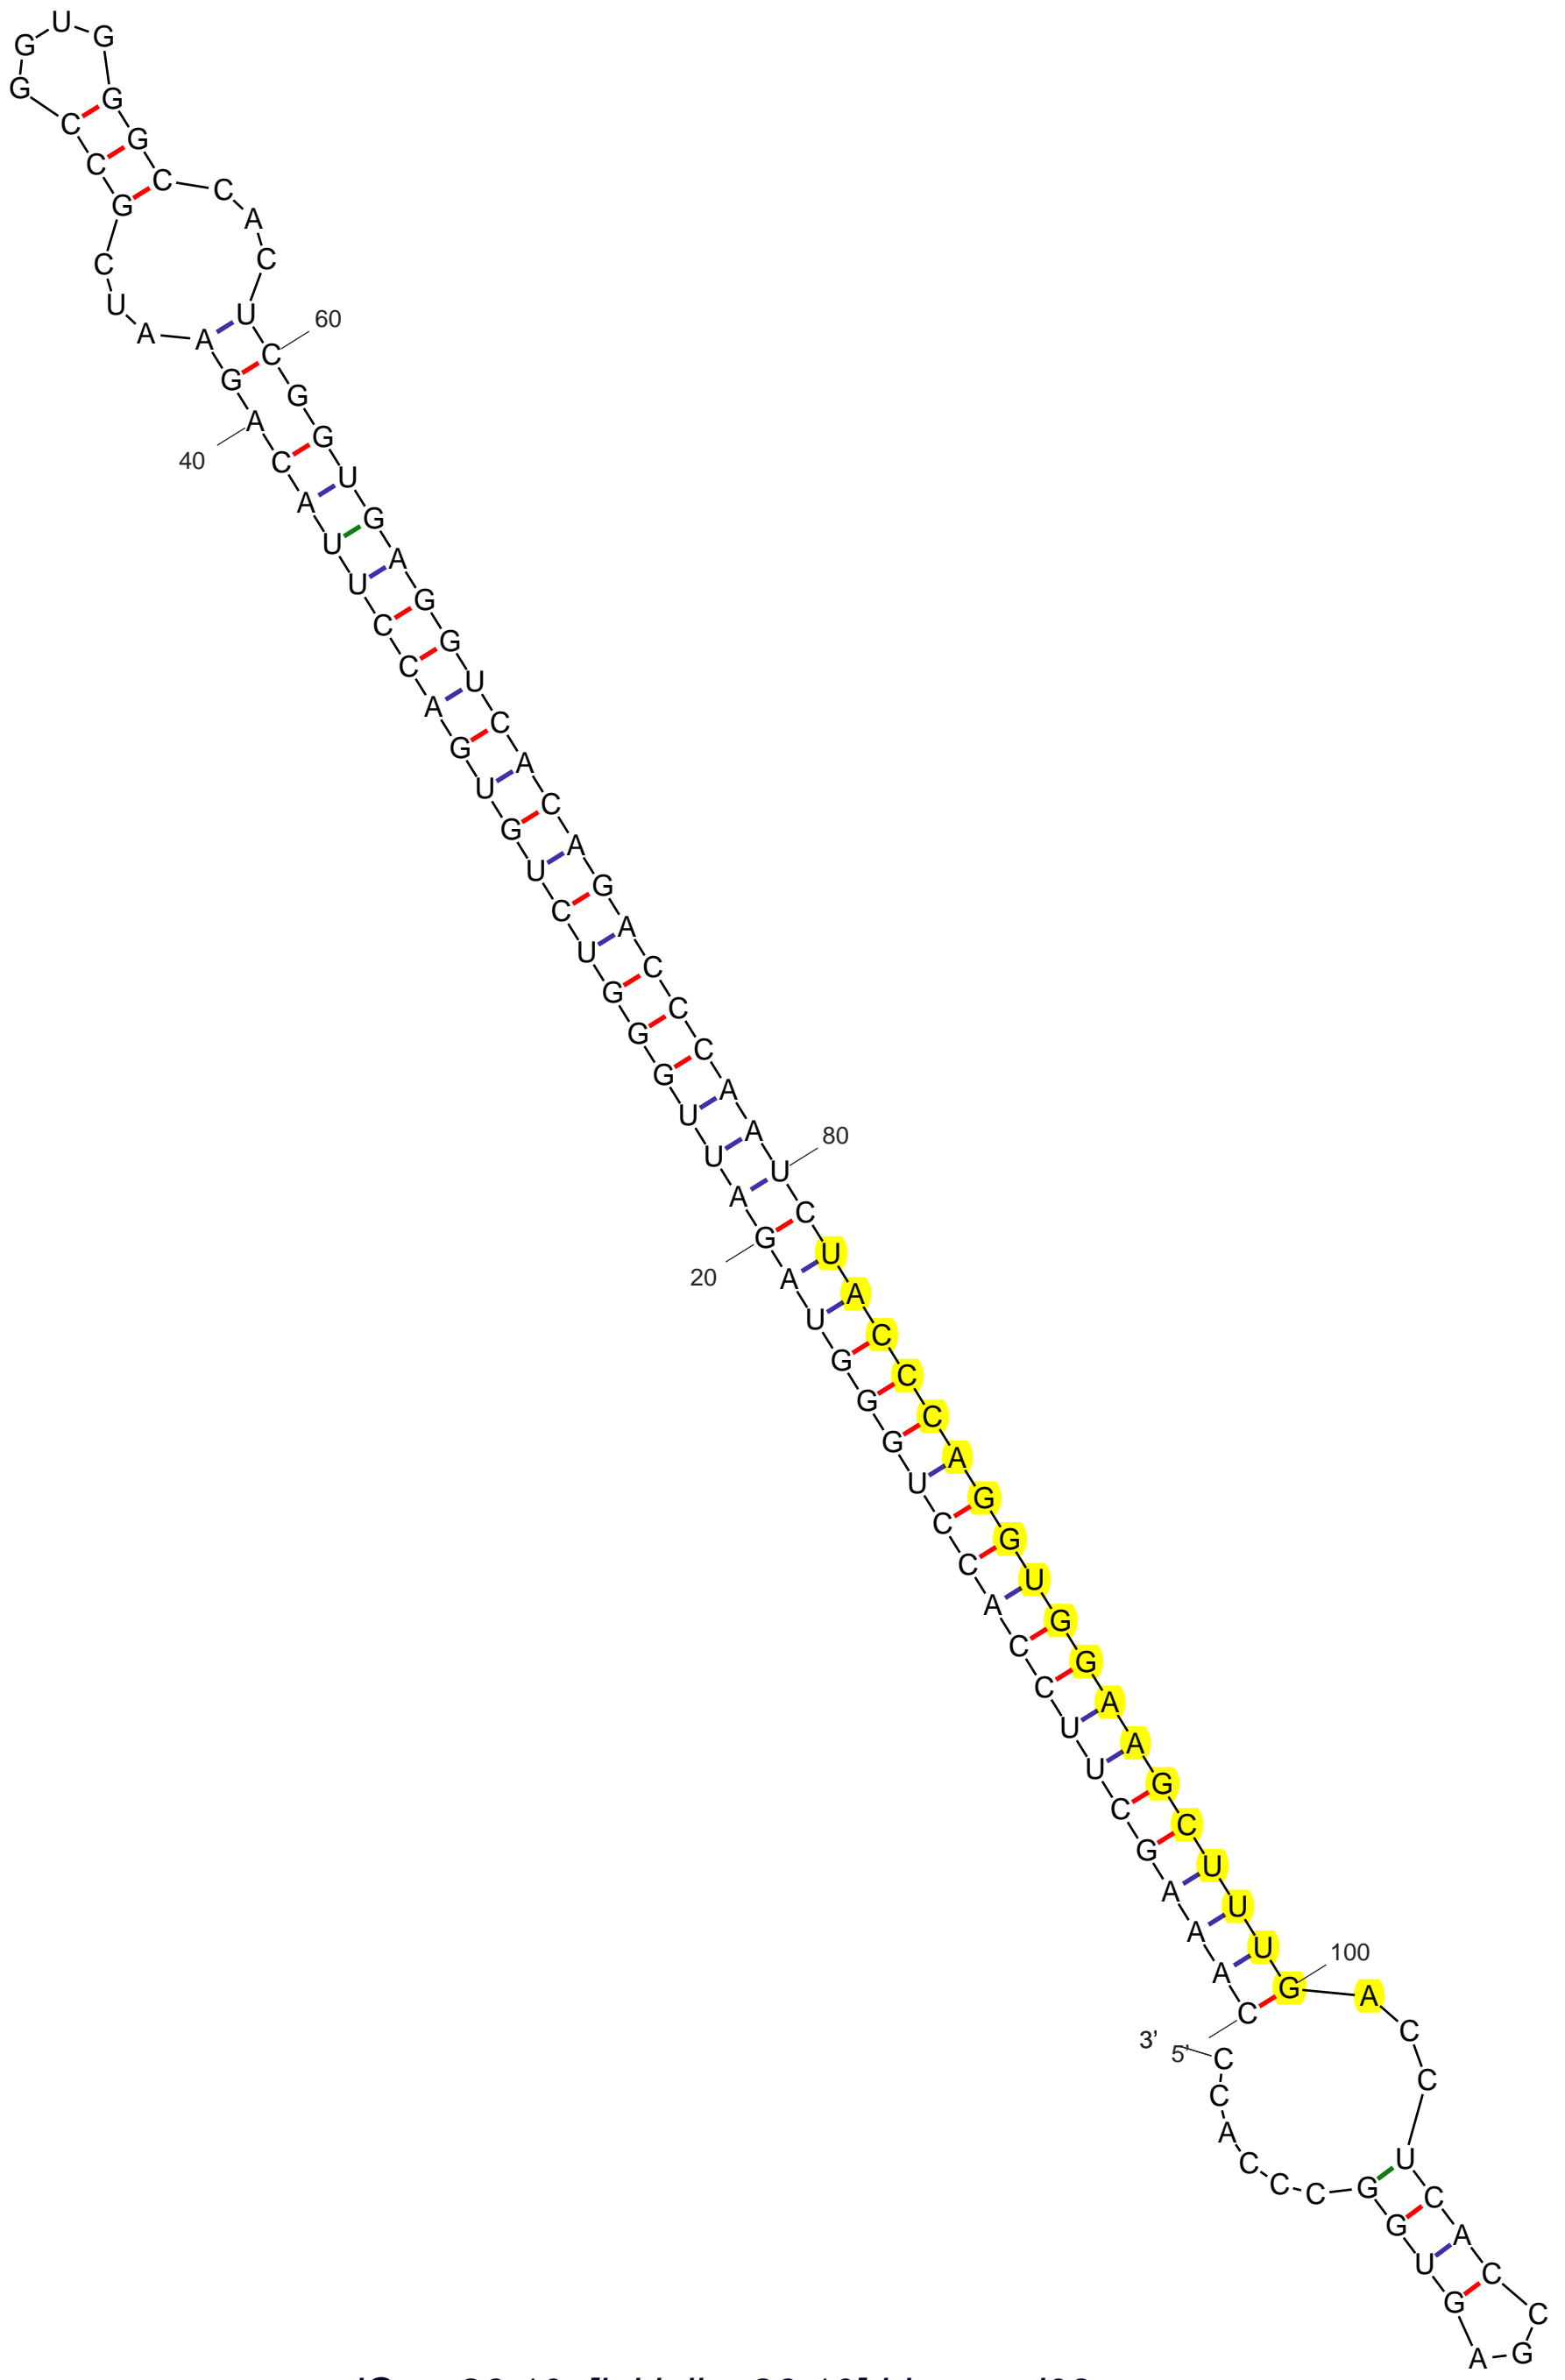

$dG = -86.10$  [initially -86.10] hbr-cand03



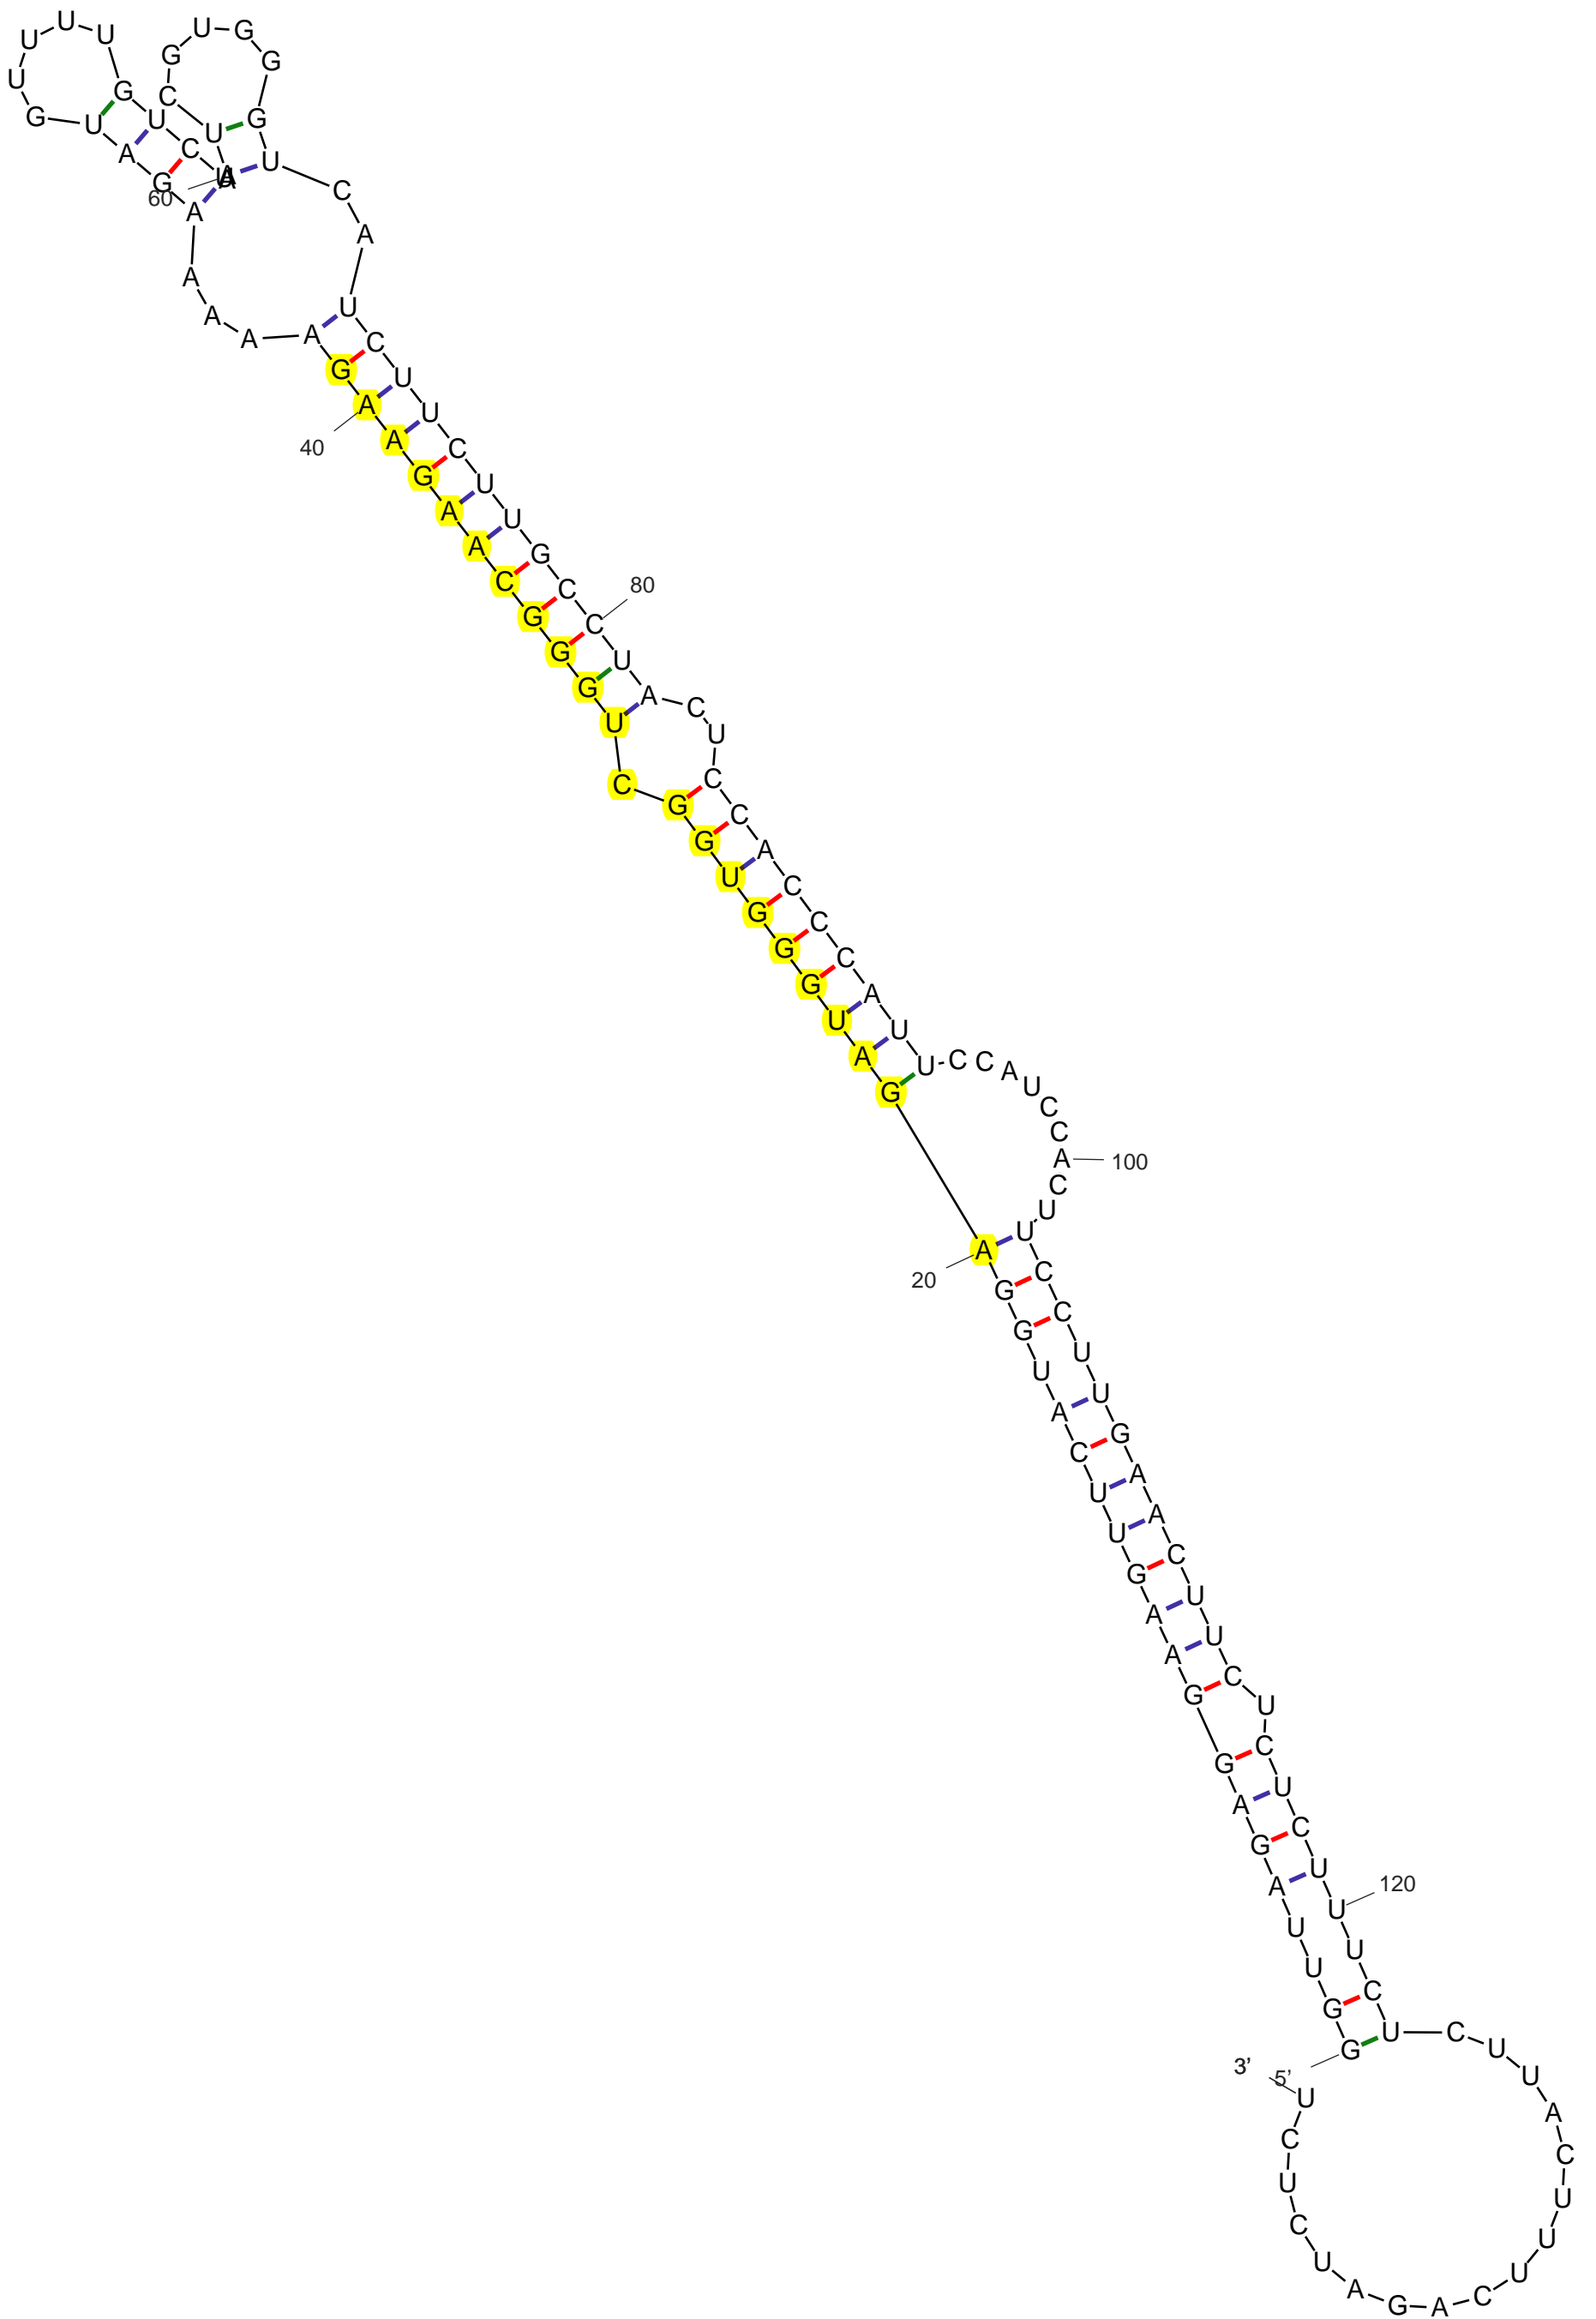

*dG = -50.30 [initially -52.30] hbr-cand05*

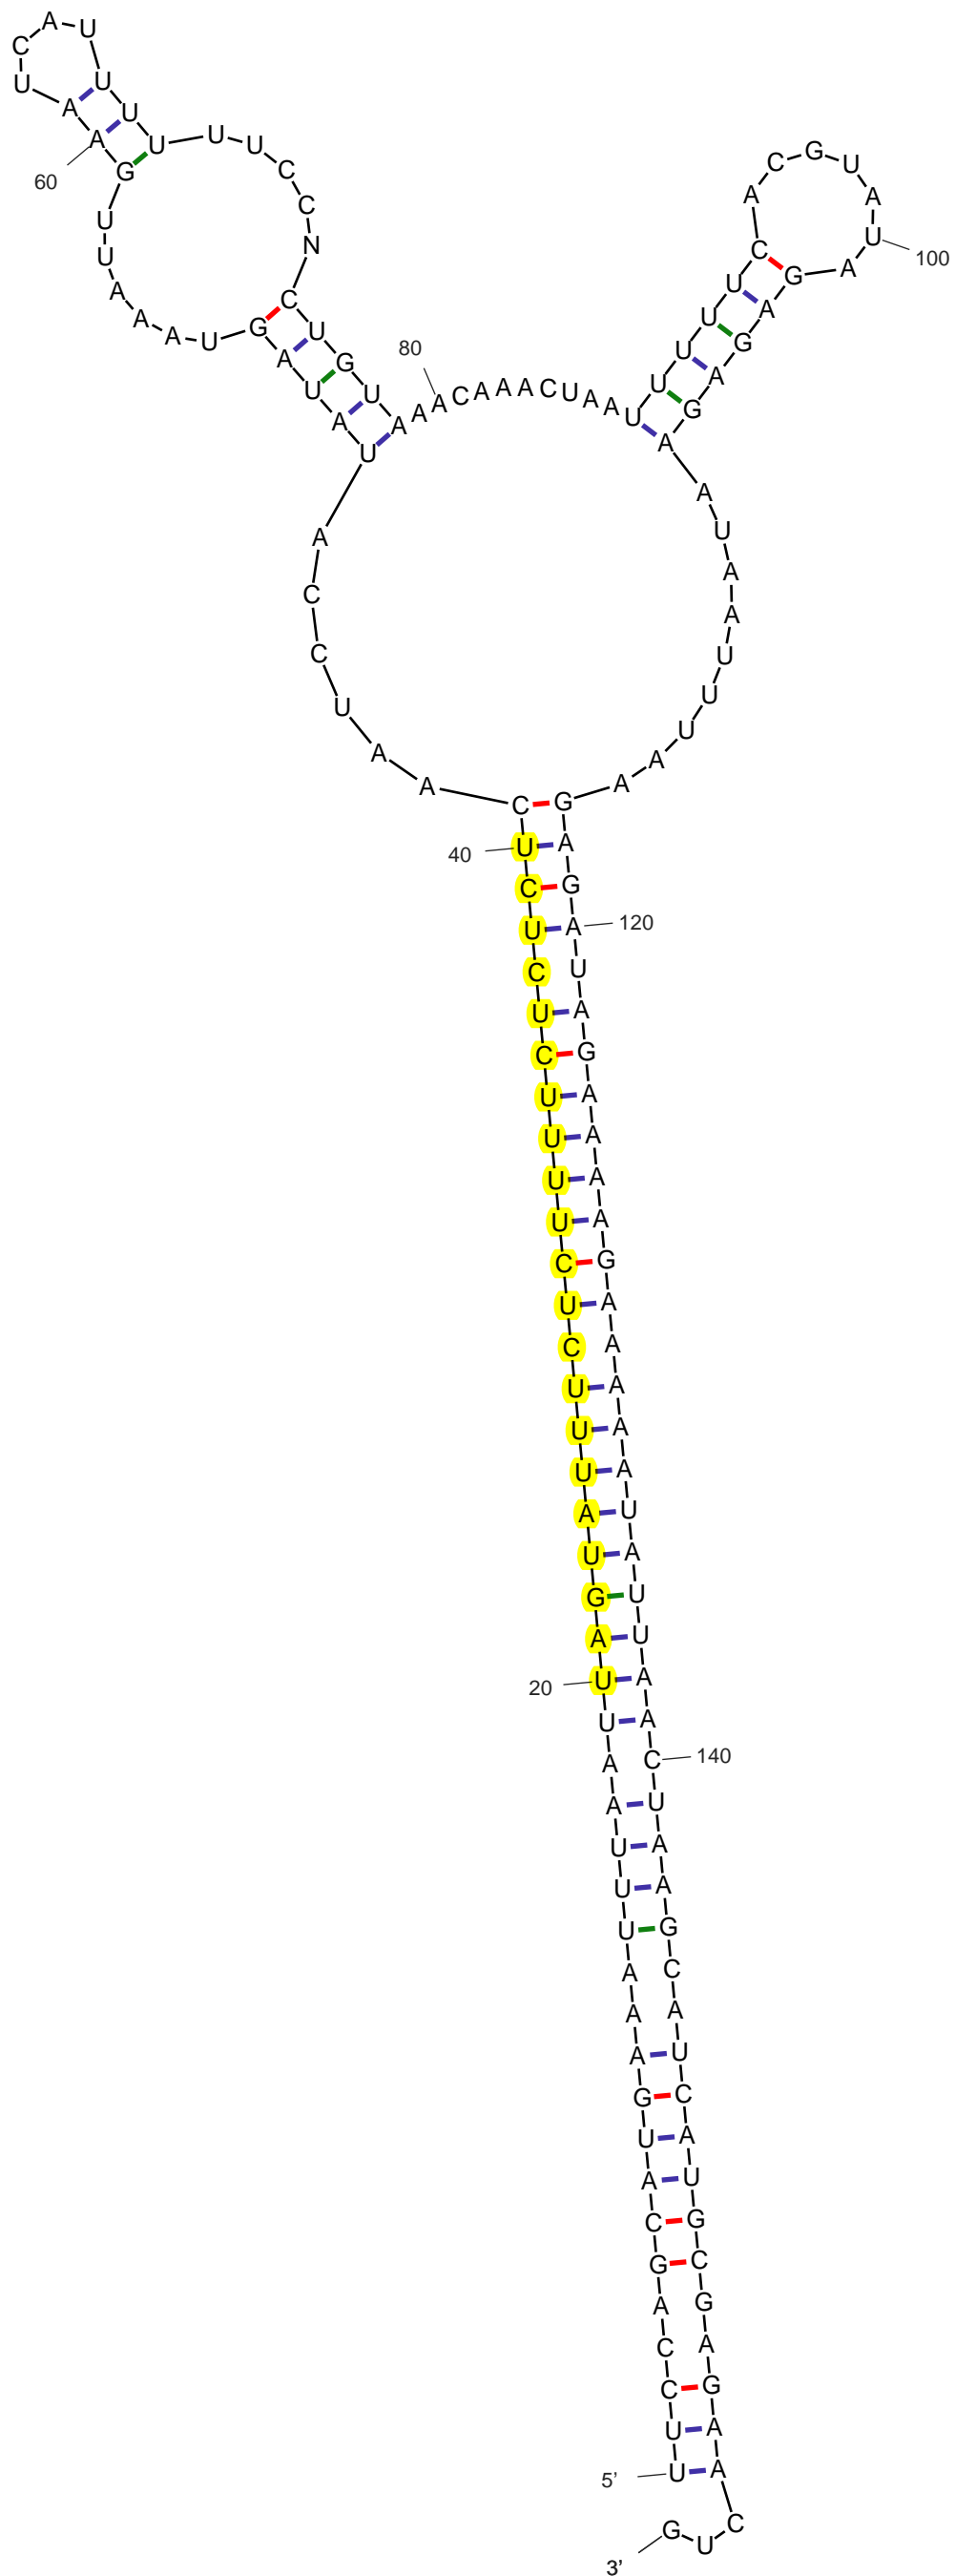

$dG = -31.93$  [initially -37.10] hbr-cand06

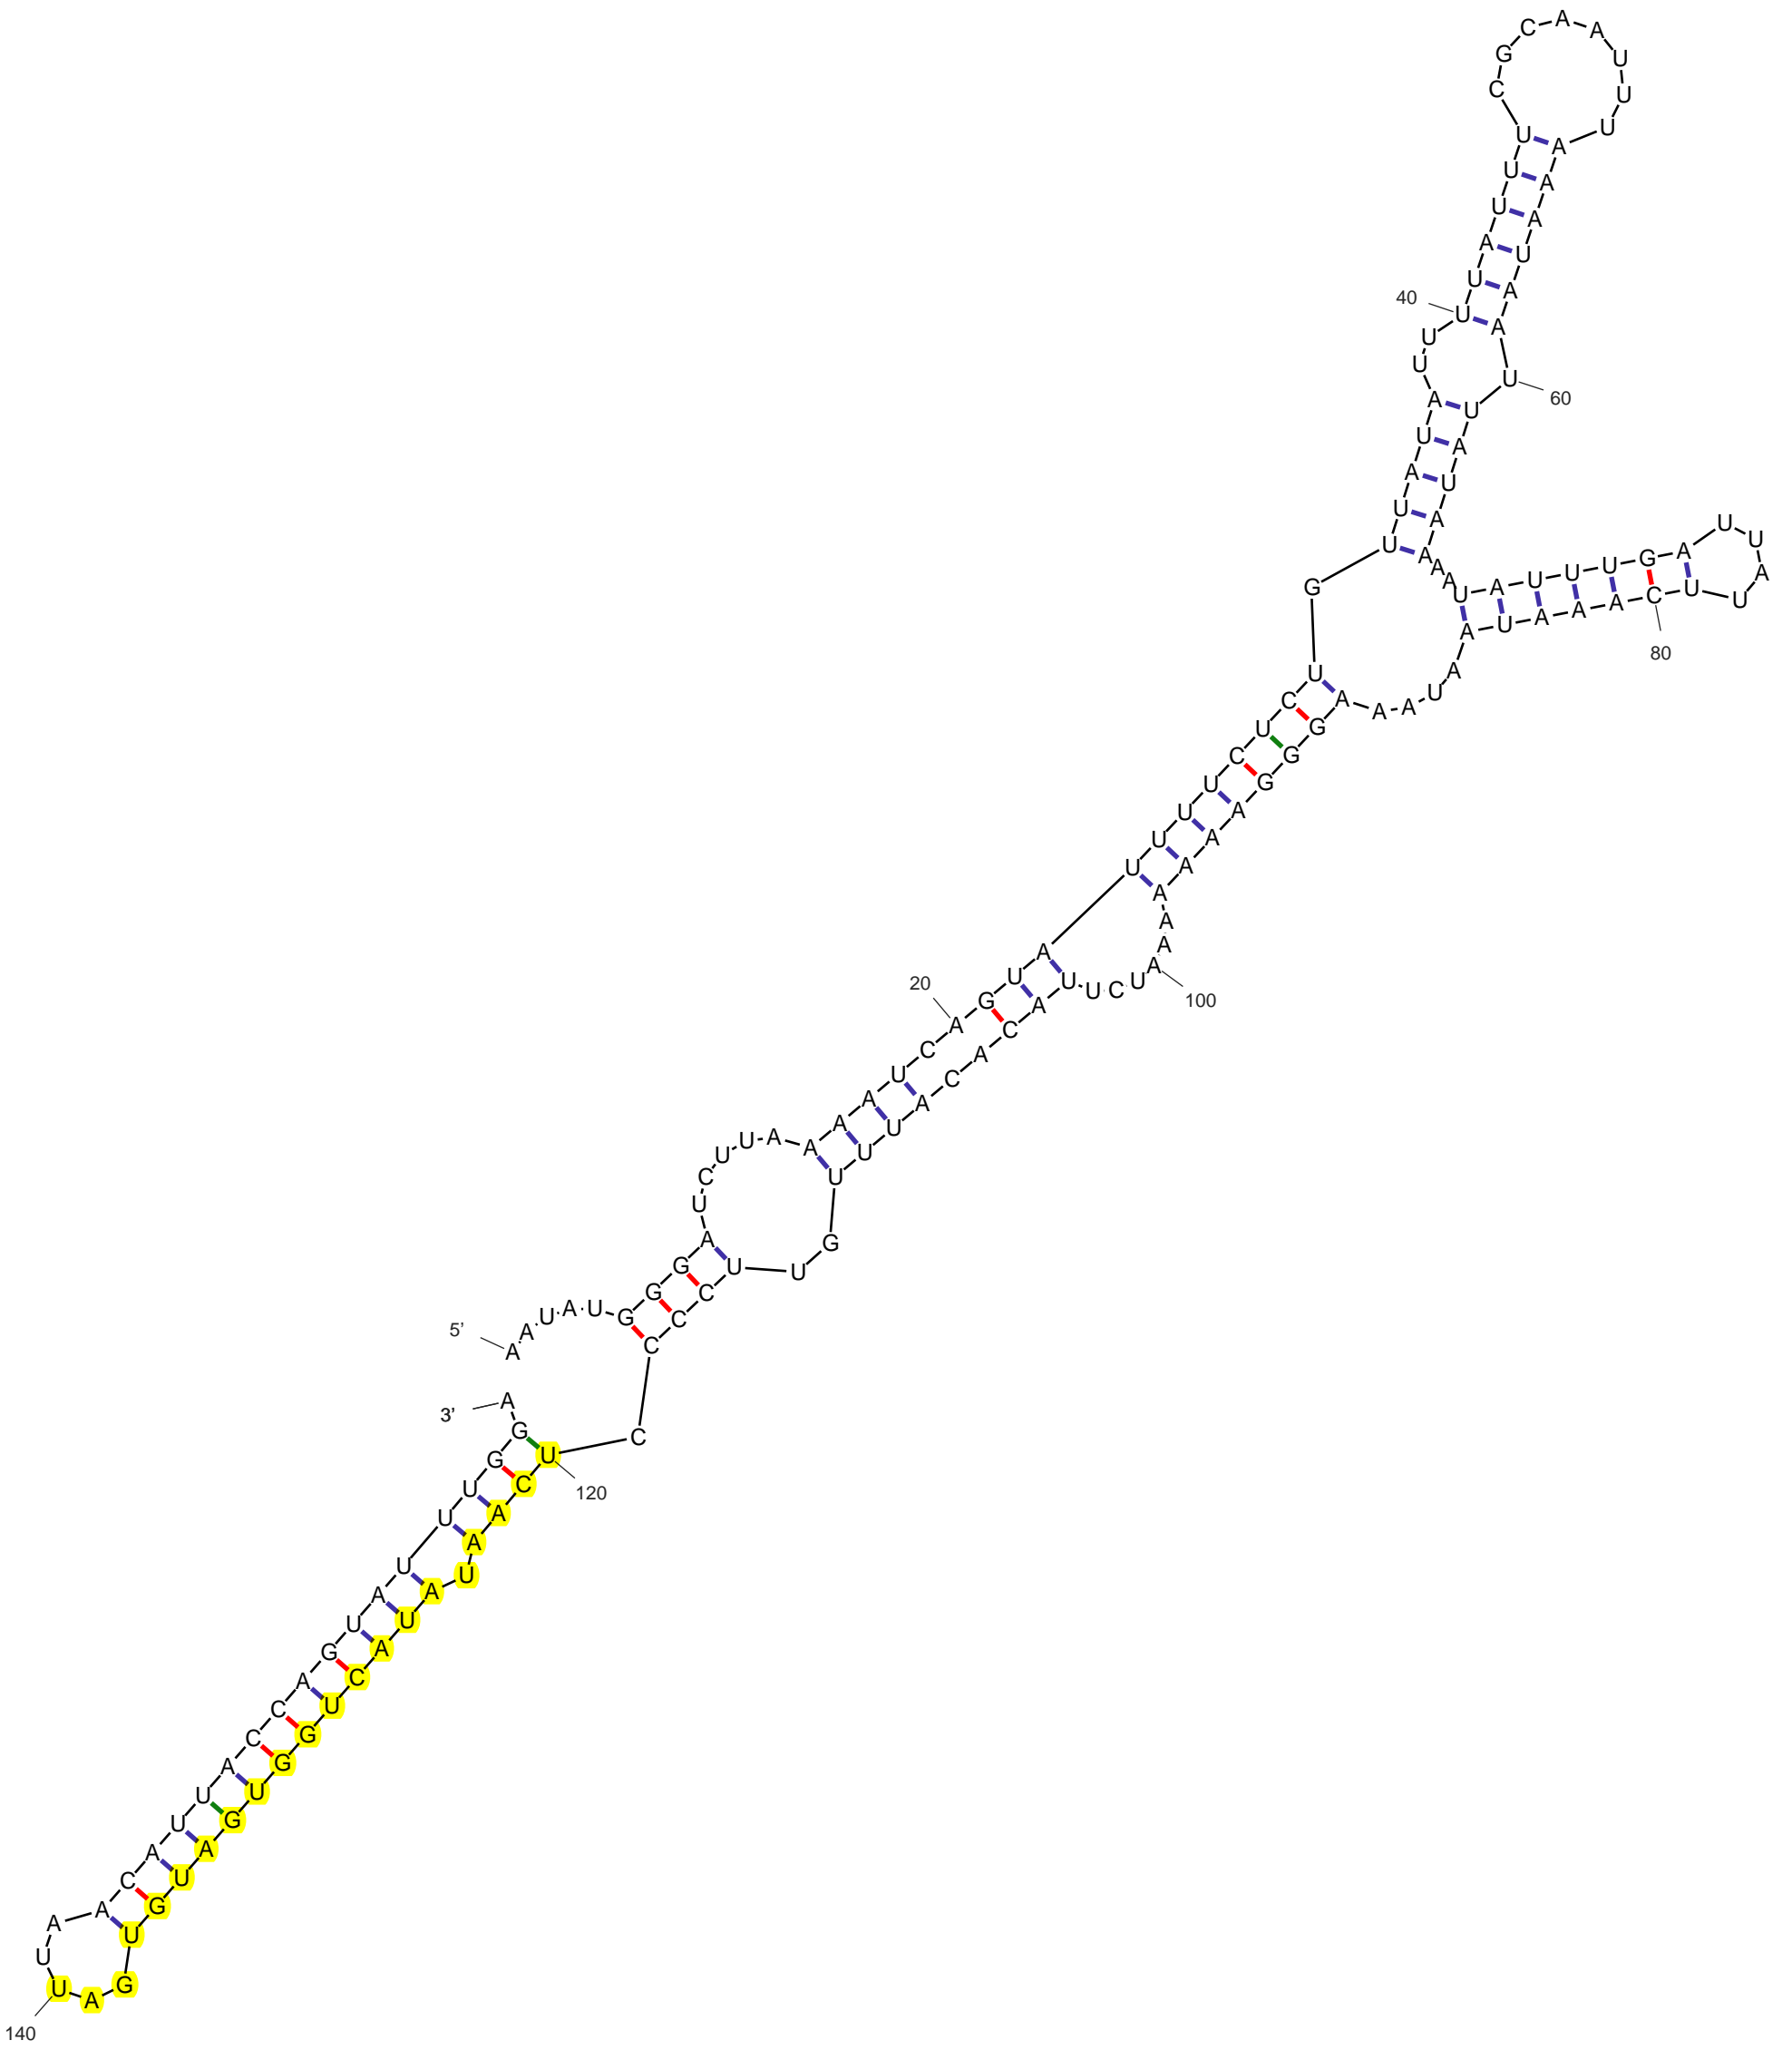

$dG = -37.73$  [initially -37.80] hbr-cand07

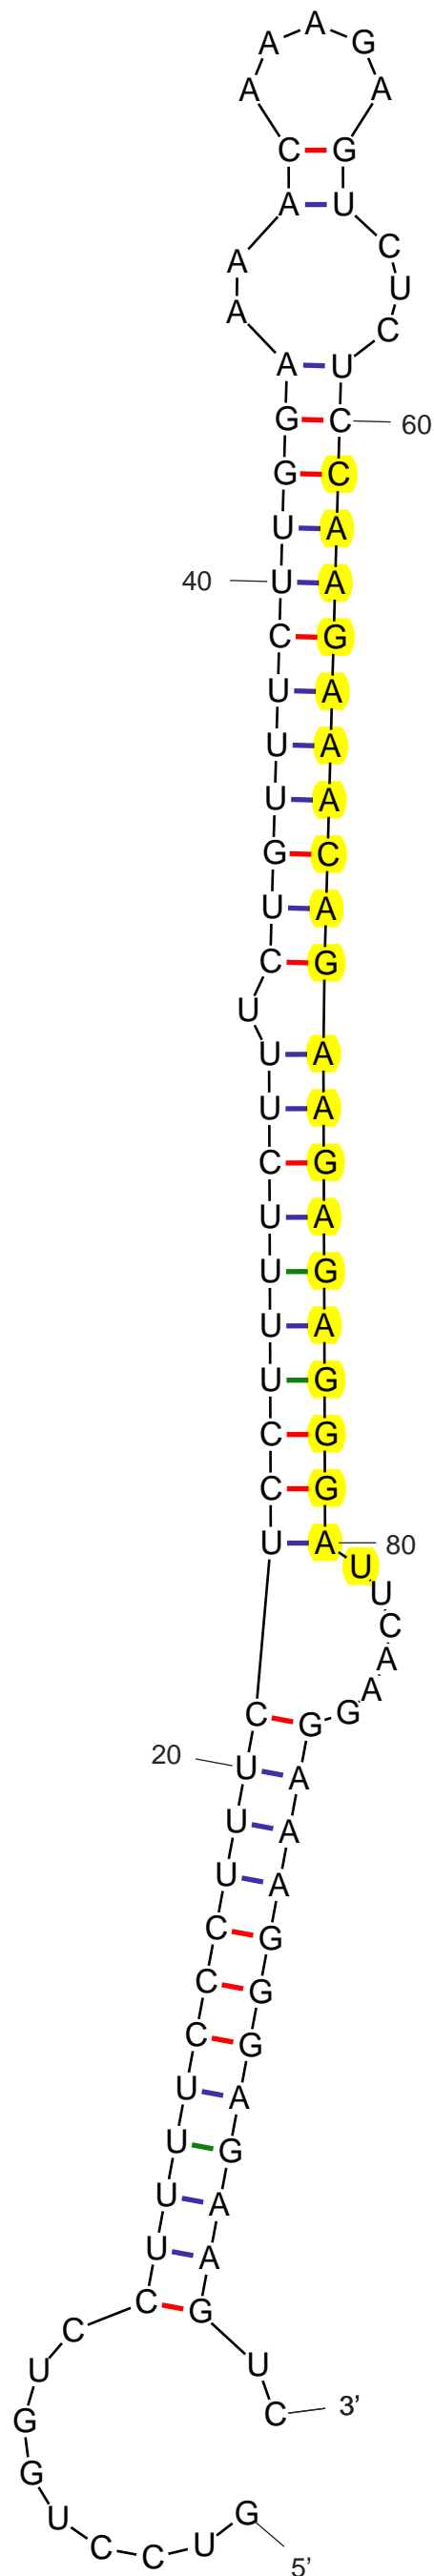



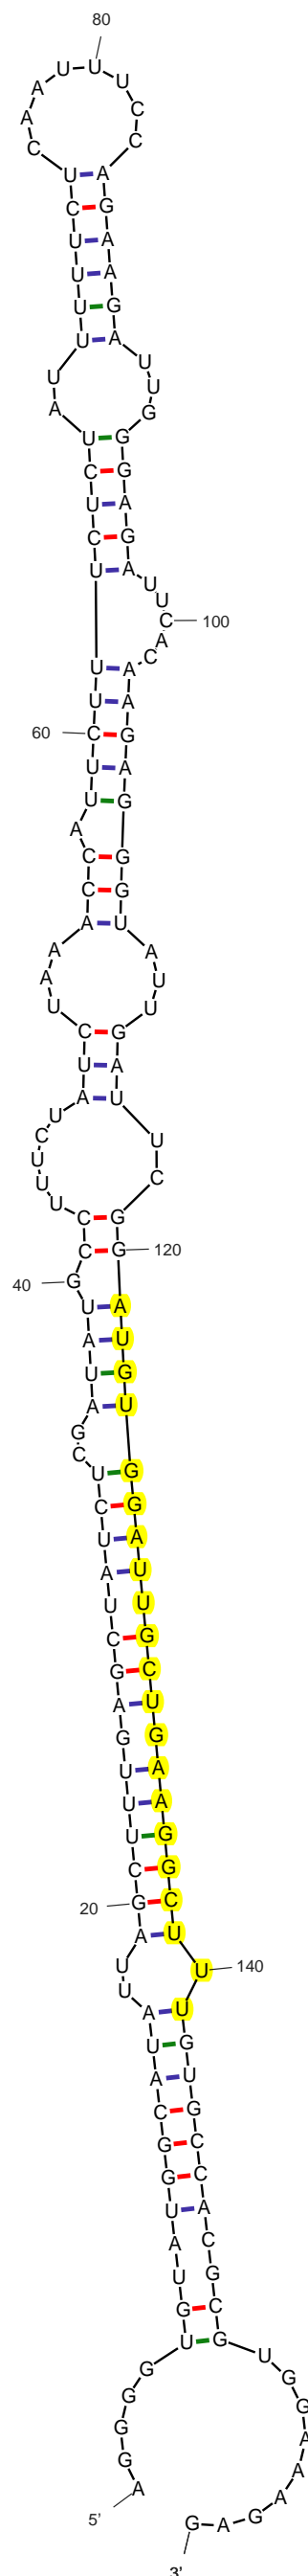

$dG = -46.00$  [initially -46.20] hbr-cand09

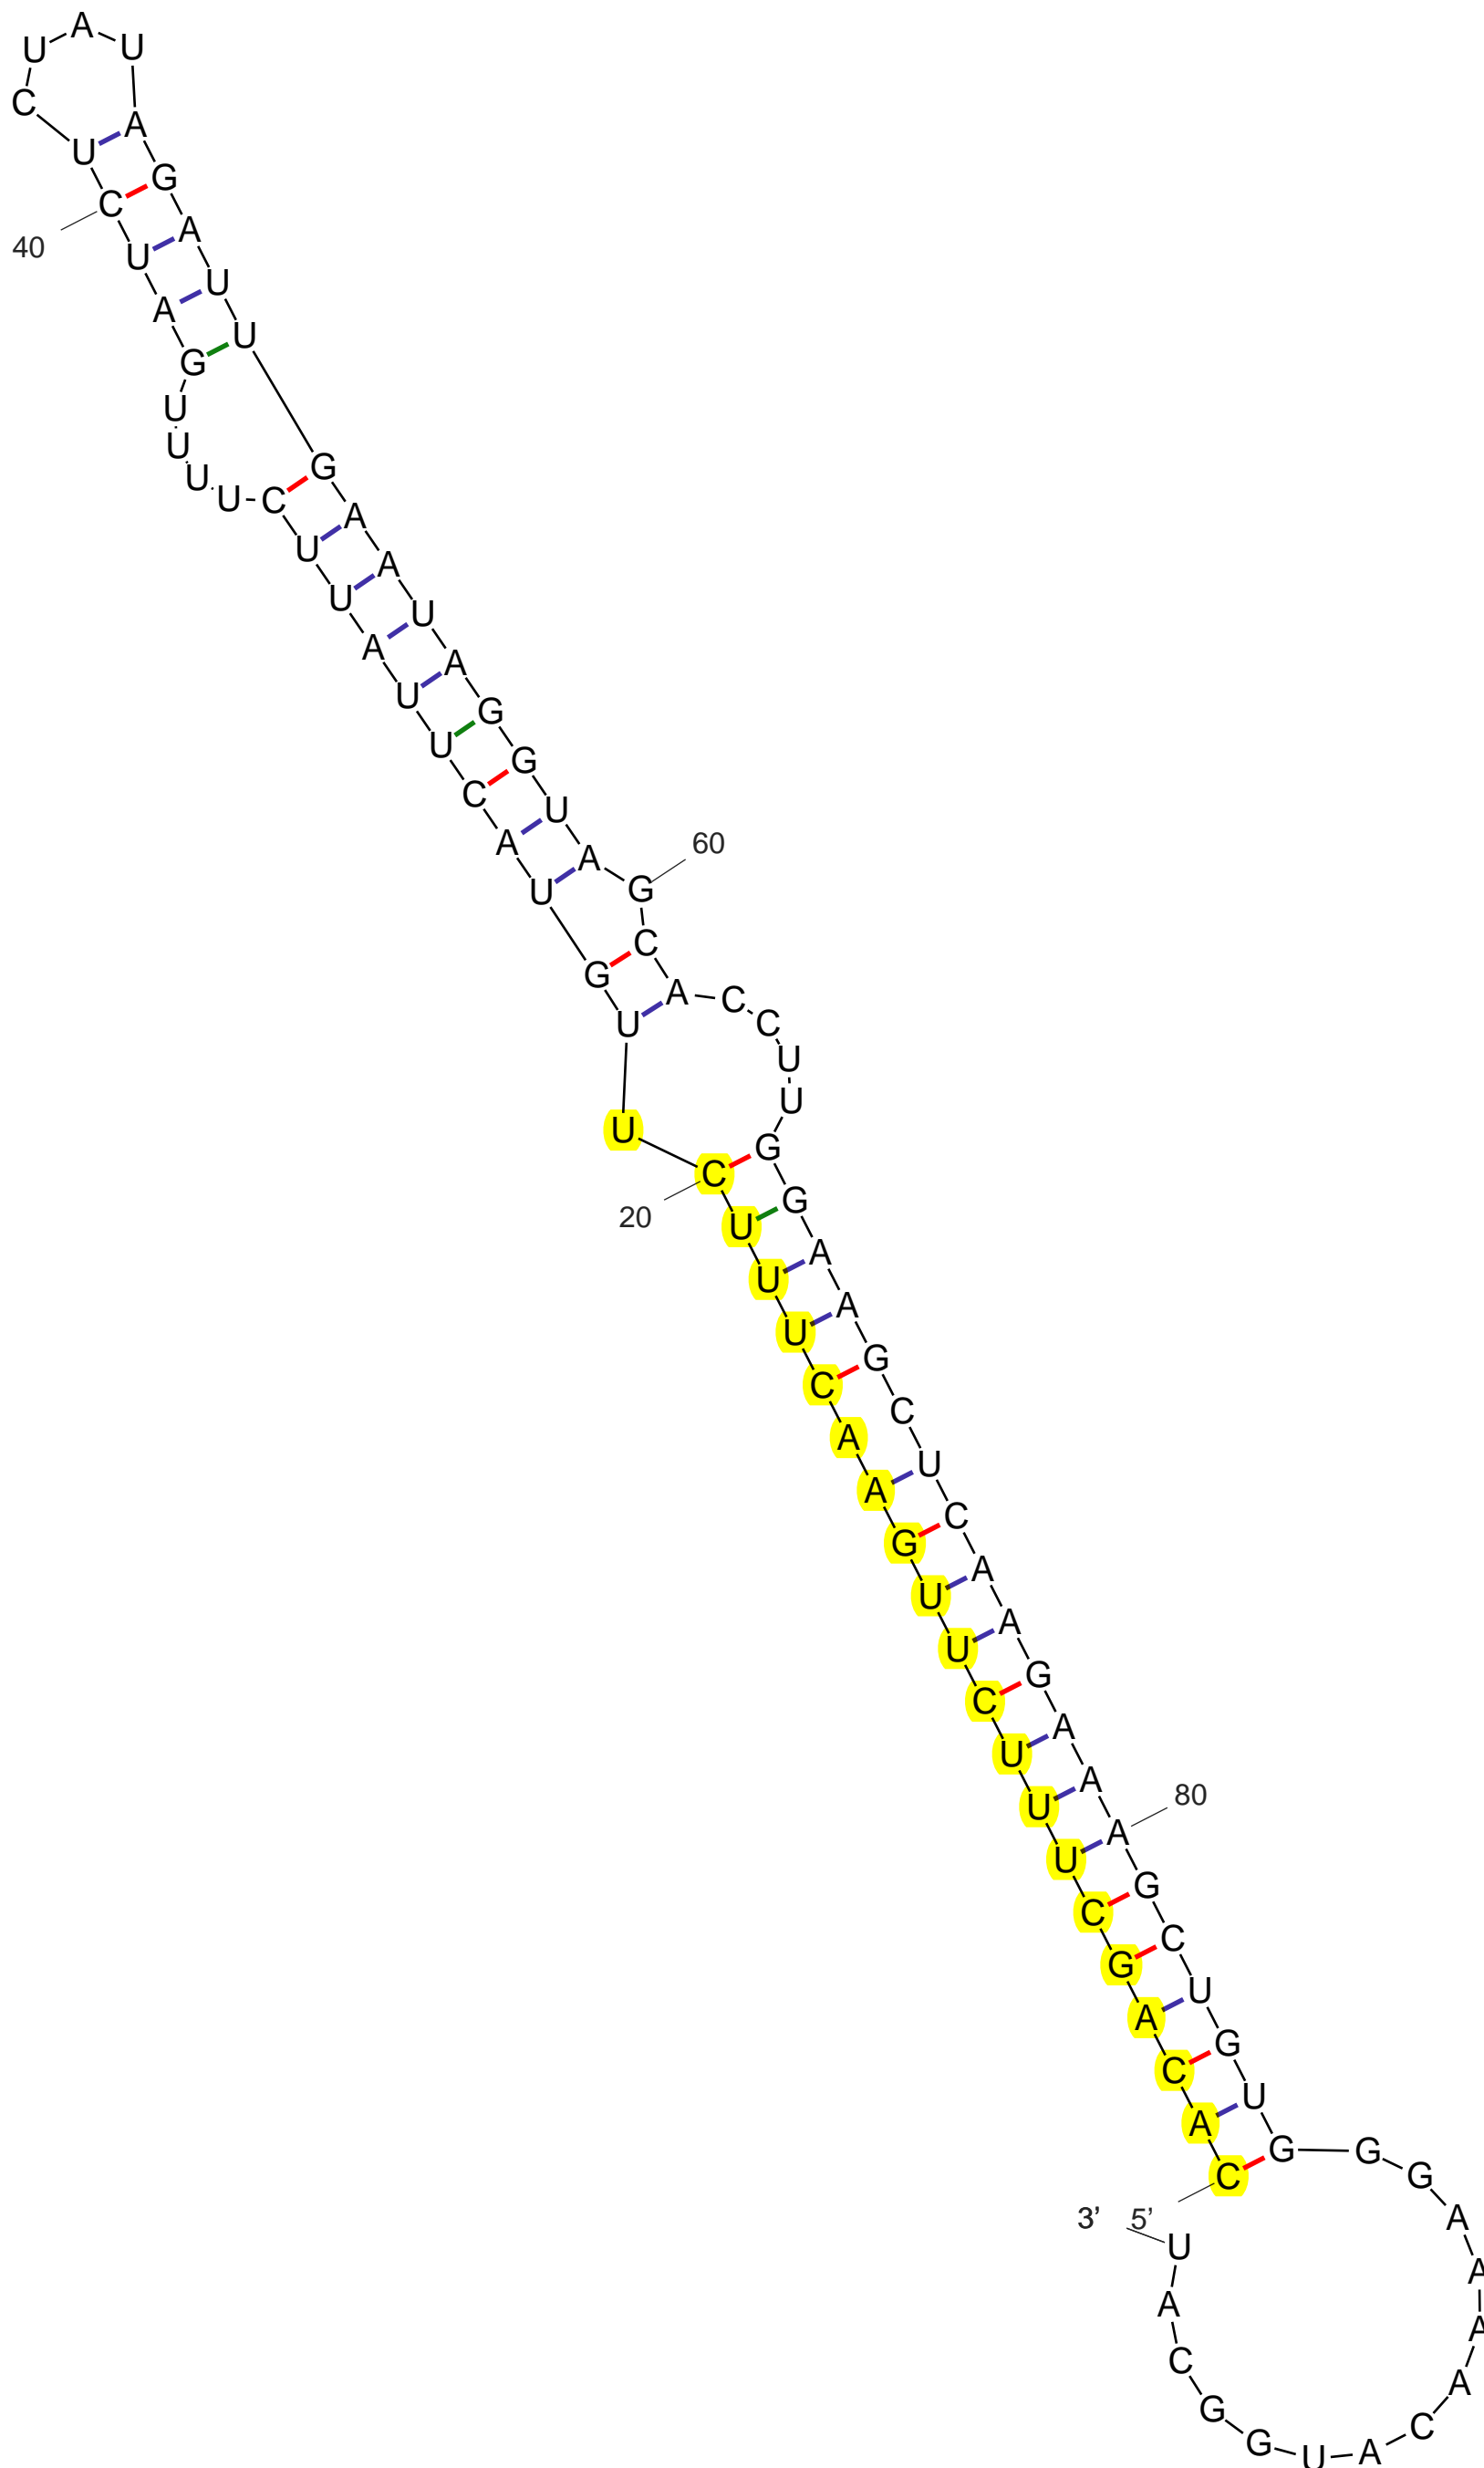

$dG = -37.30$  [initially -37.30] hbr-cand10

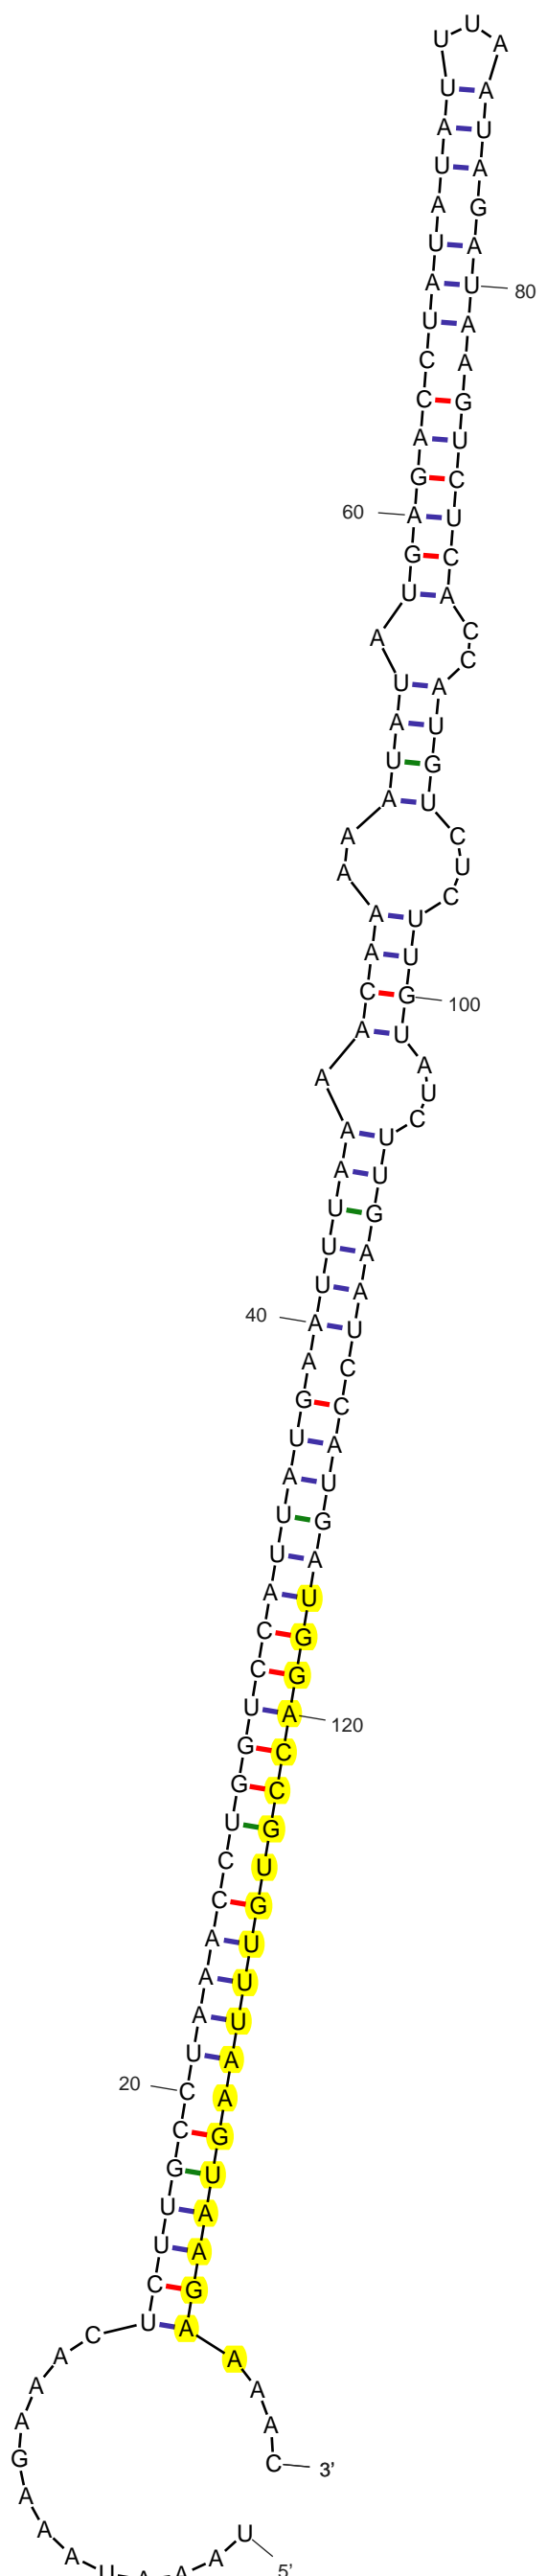

$dG = -42.50$  [initially  $-42.50$ ] hbr-cand11

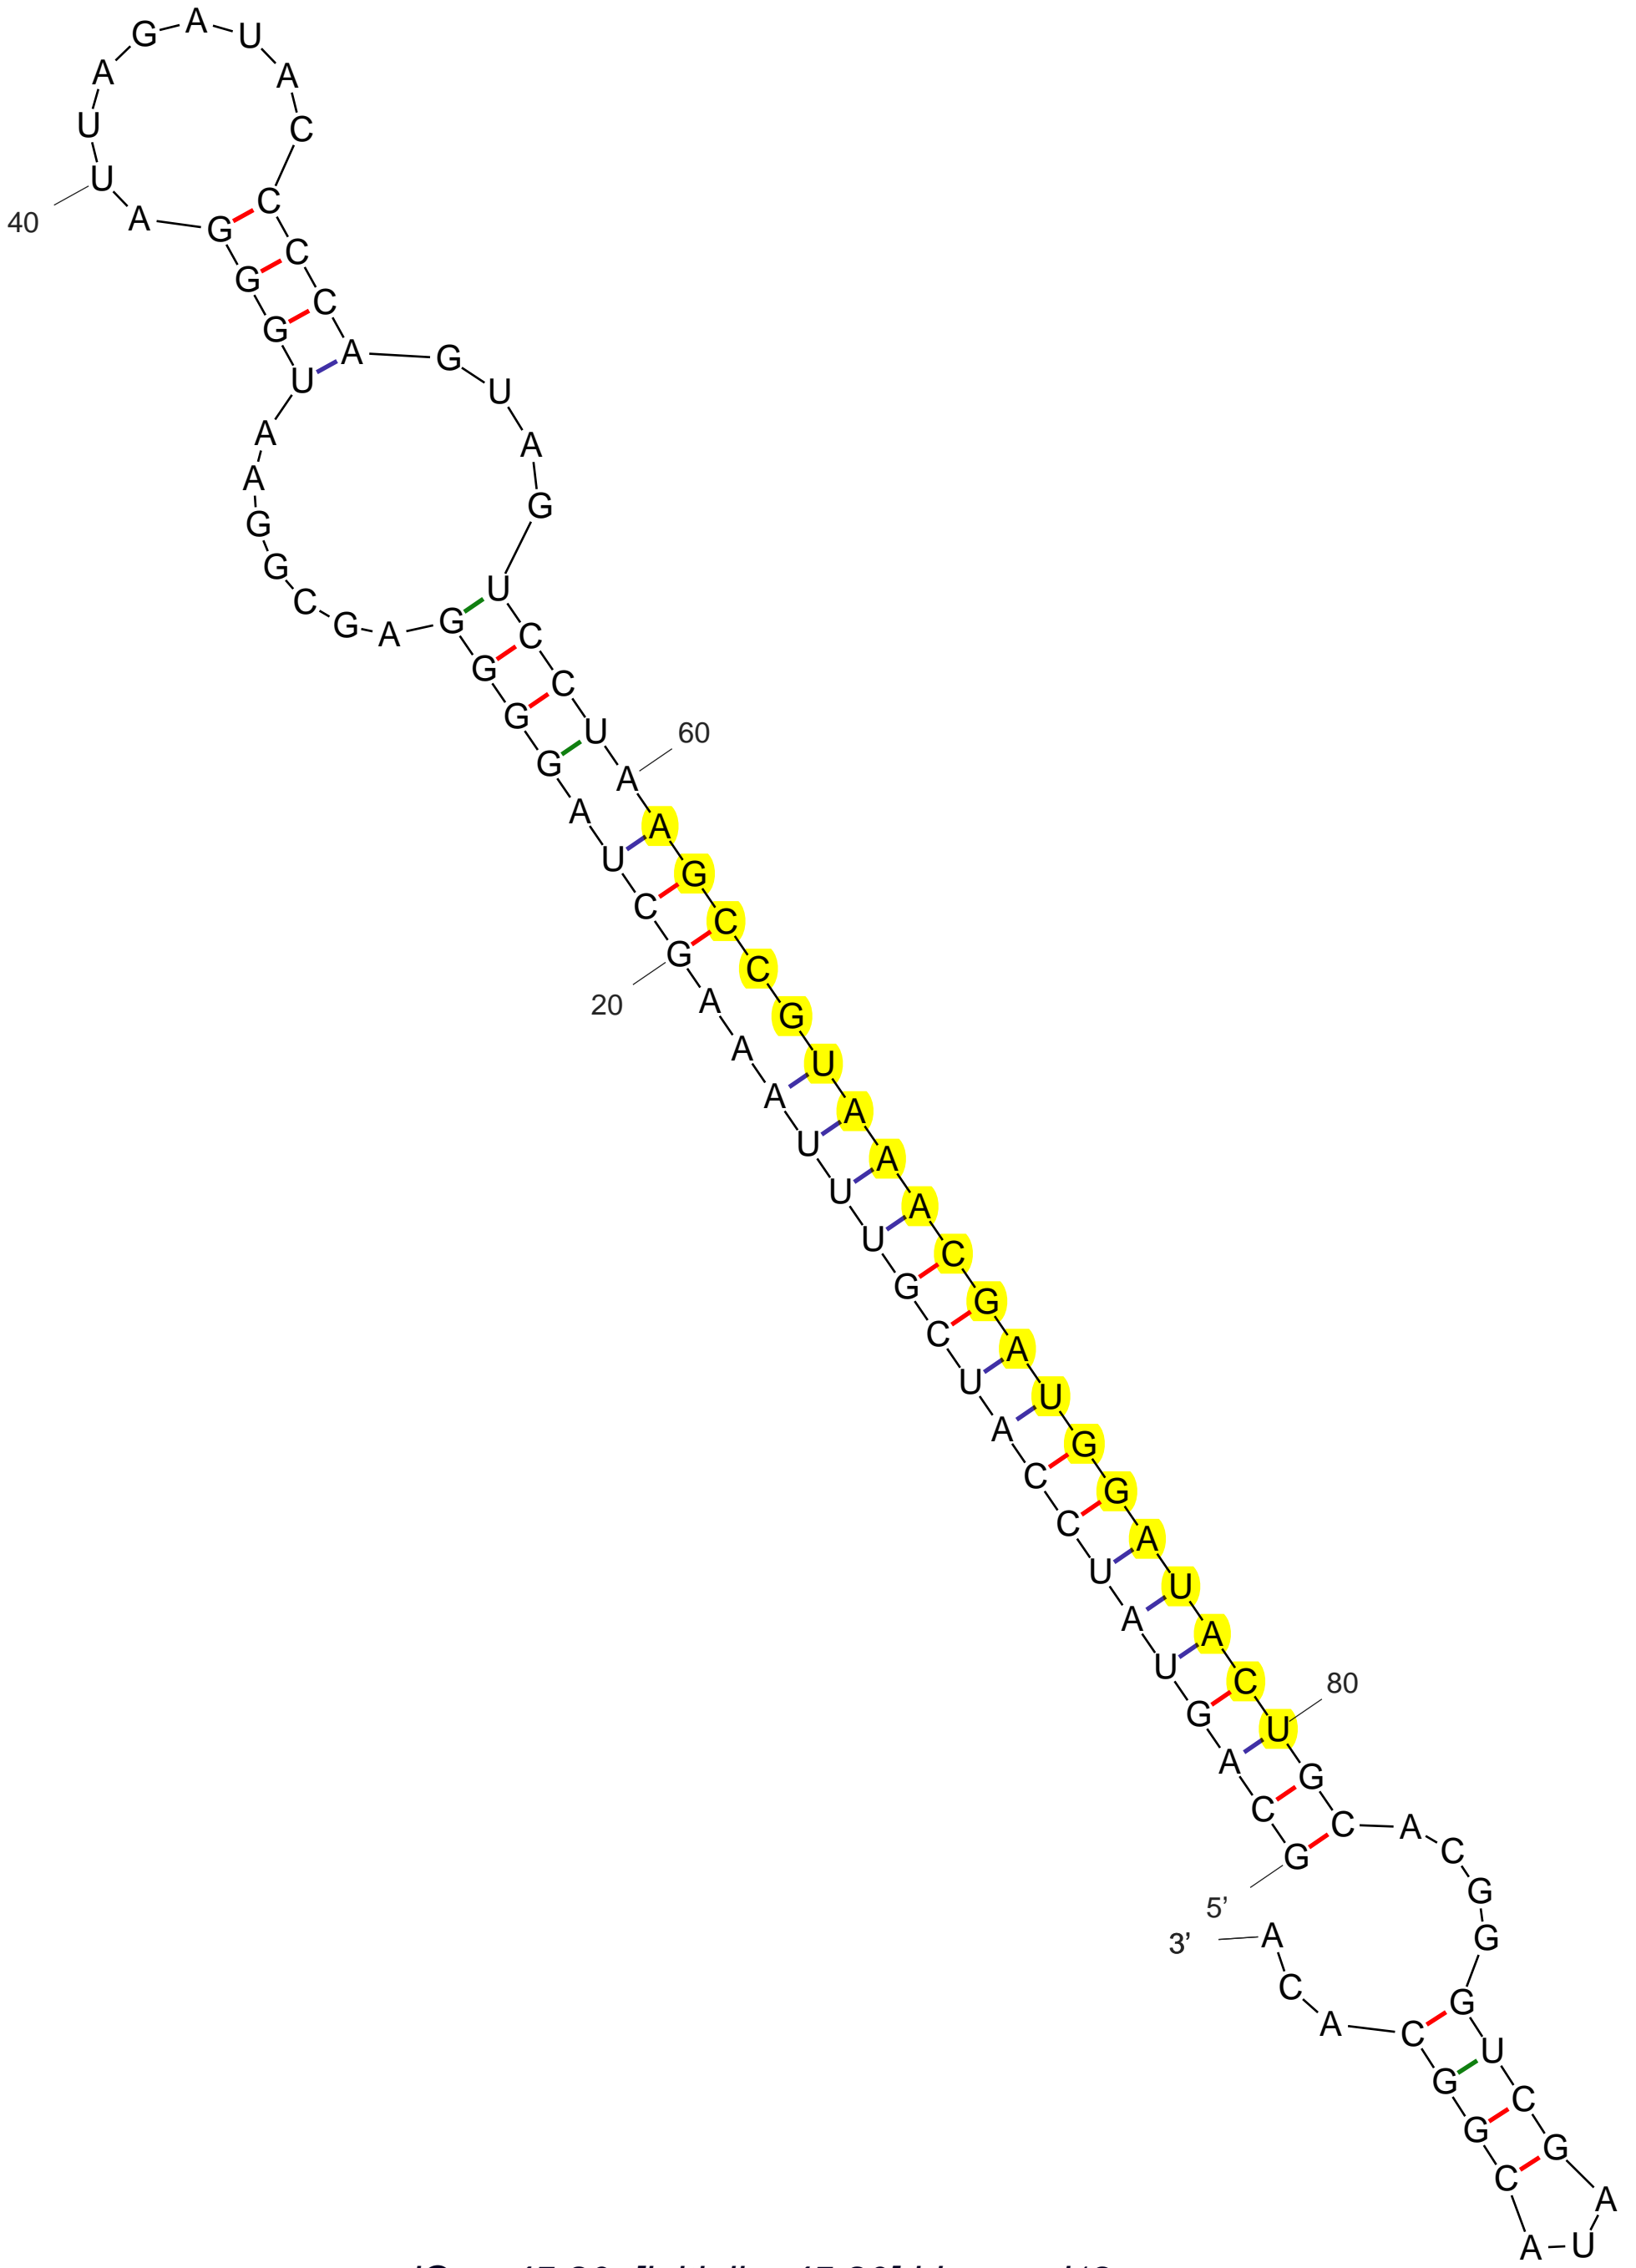

$dG = -45.80$  [initially  $-45.80$ ] hbr-cand12

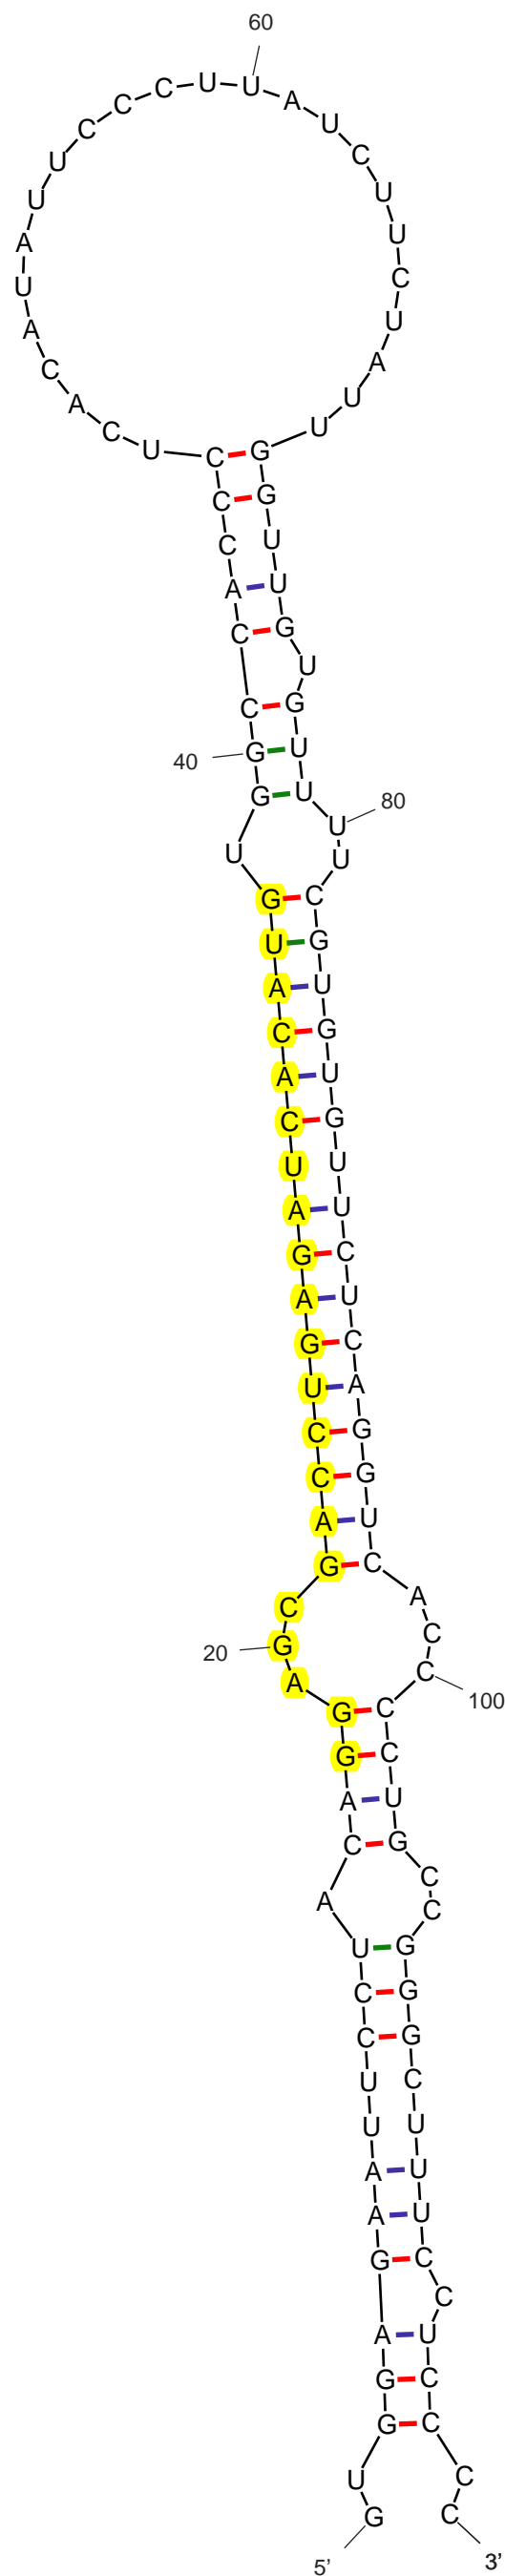

$dG = -42.30$  [initially  $-42.30$ ] hbr-cand13

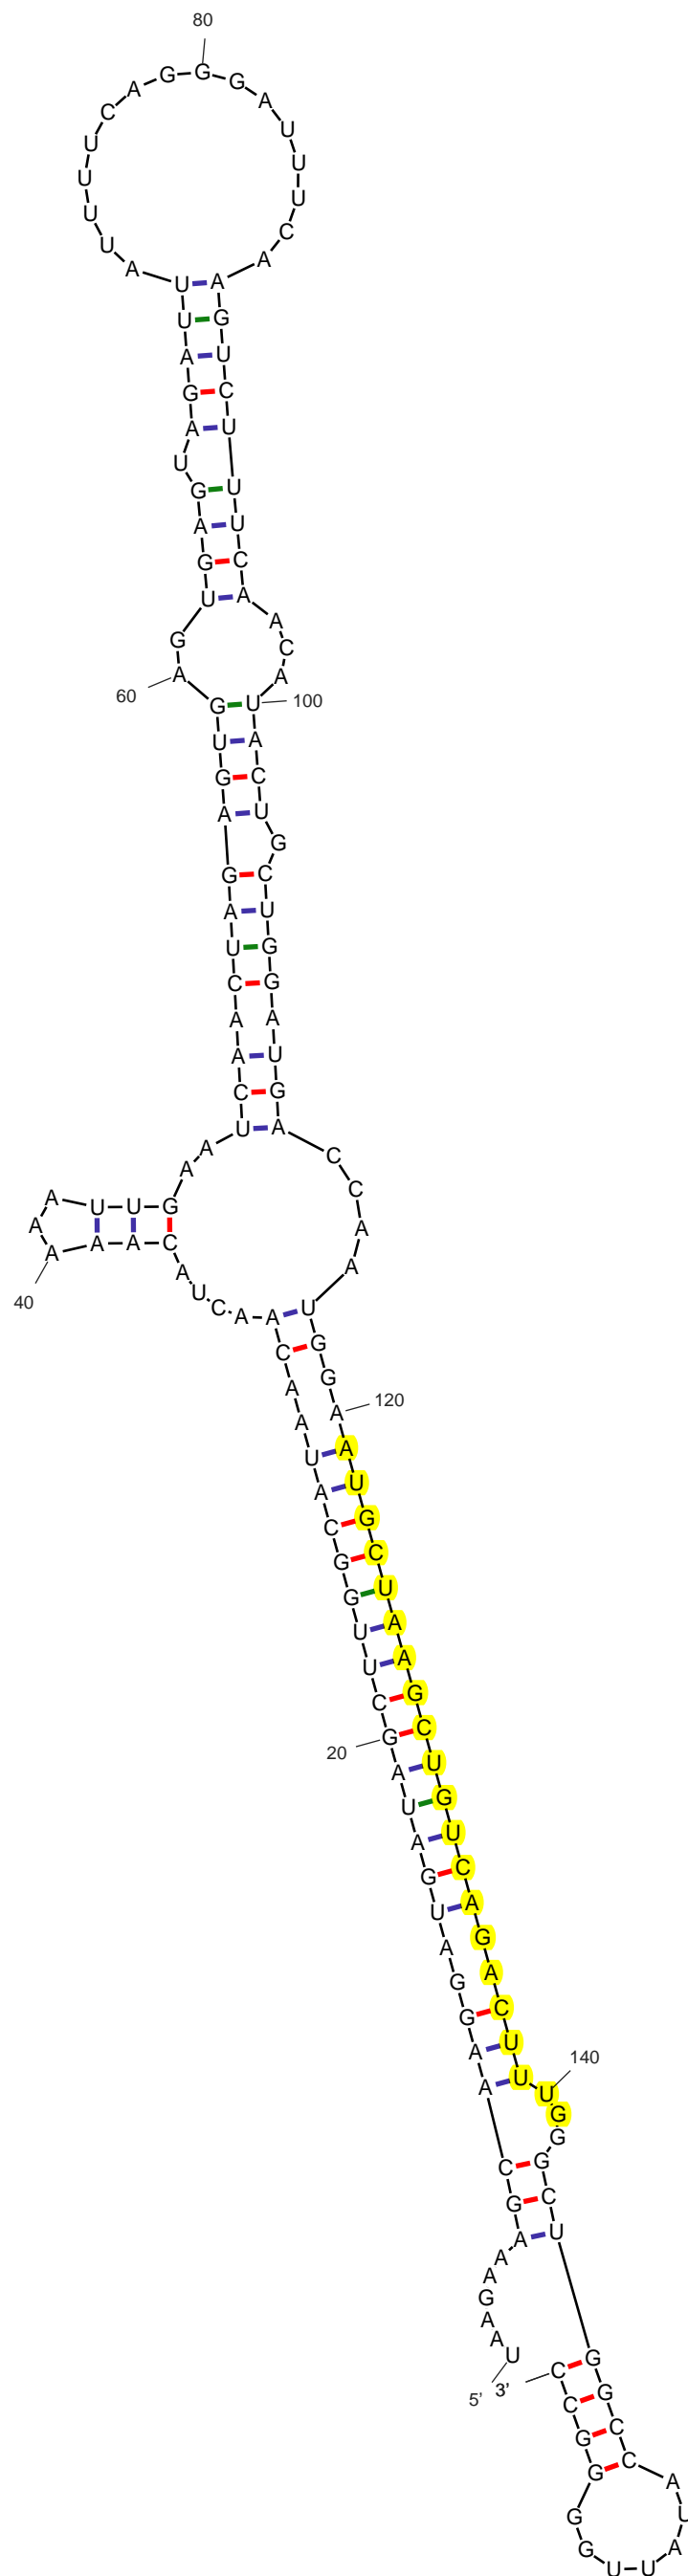

$dG = -43.44$  [initially -45.50] hbr-cand14

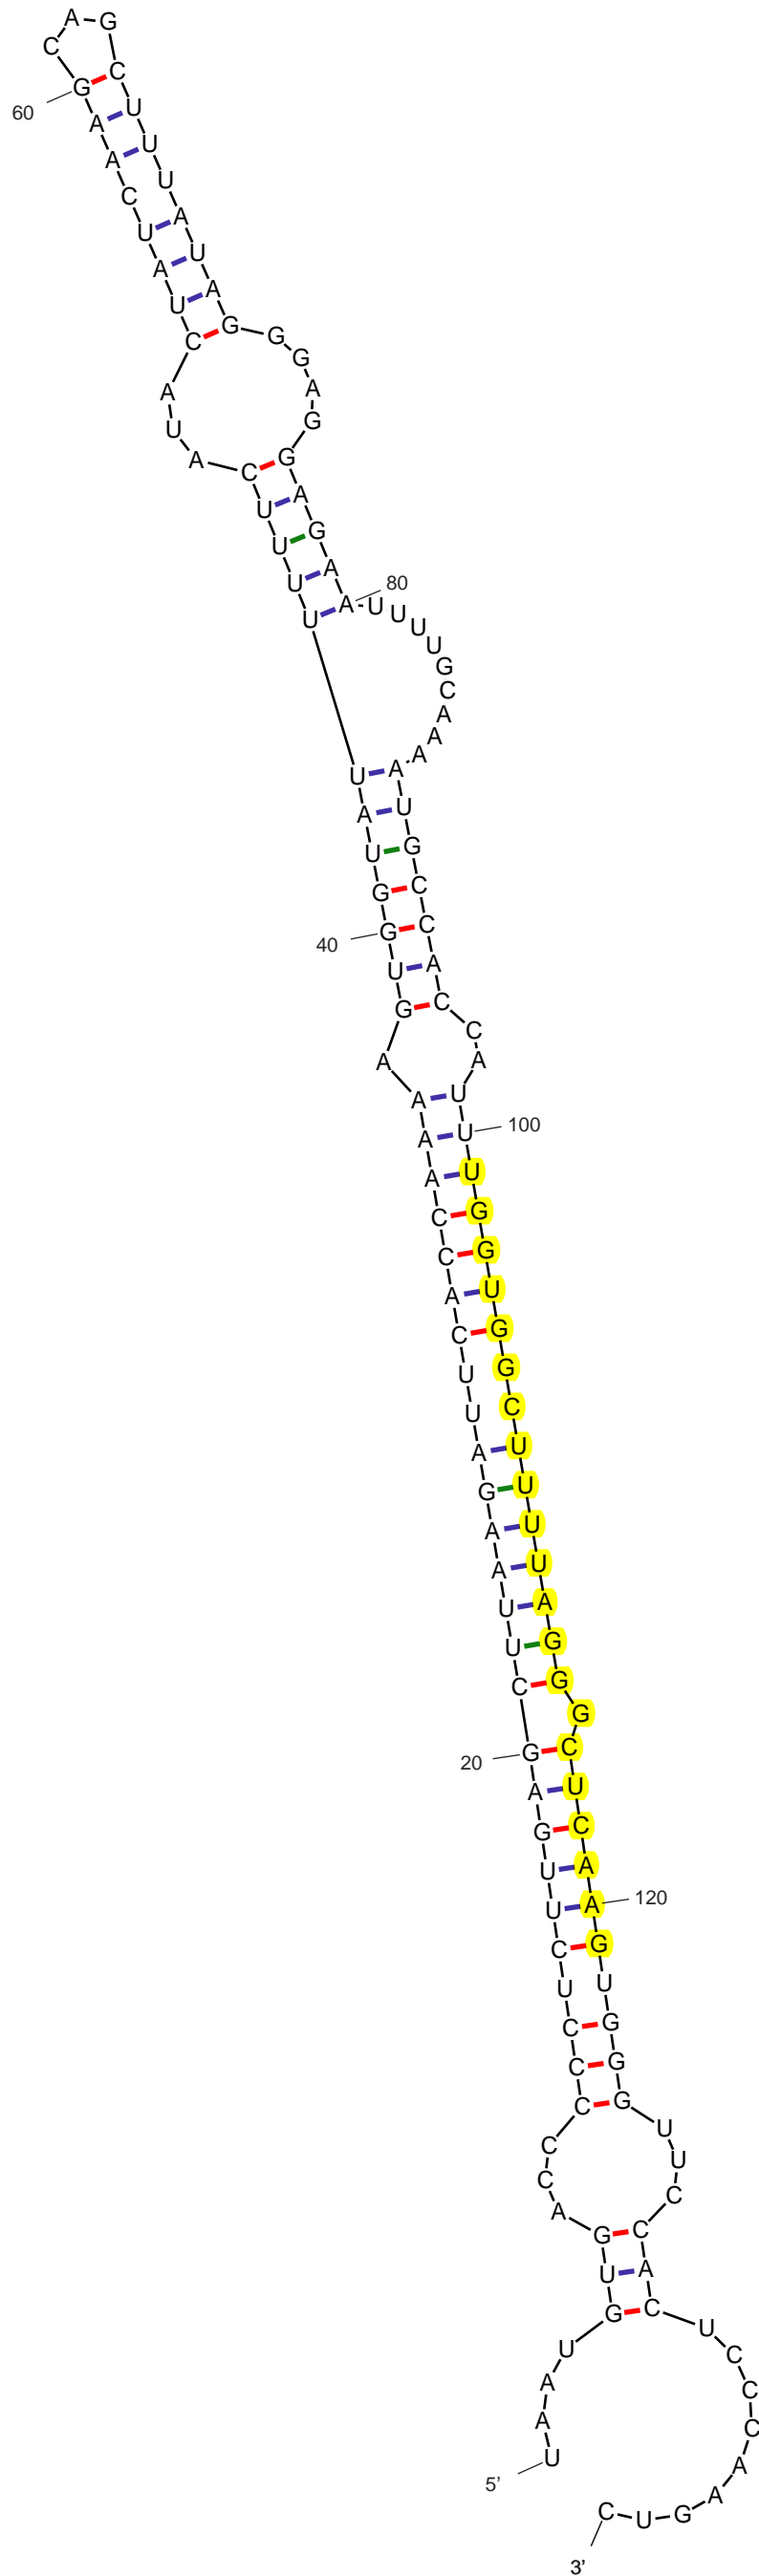

$dG = -46.10$  [initially -46.10] hbr-cand15

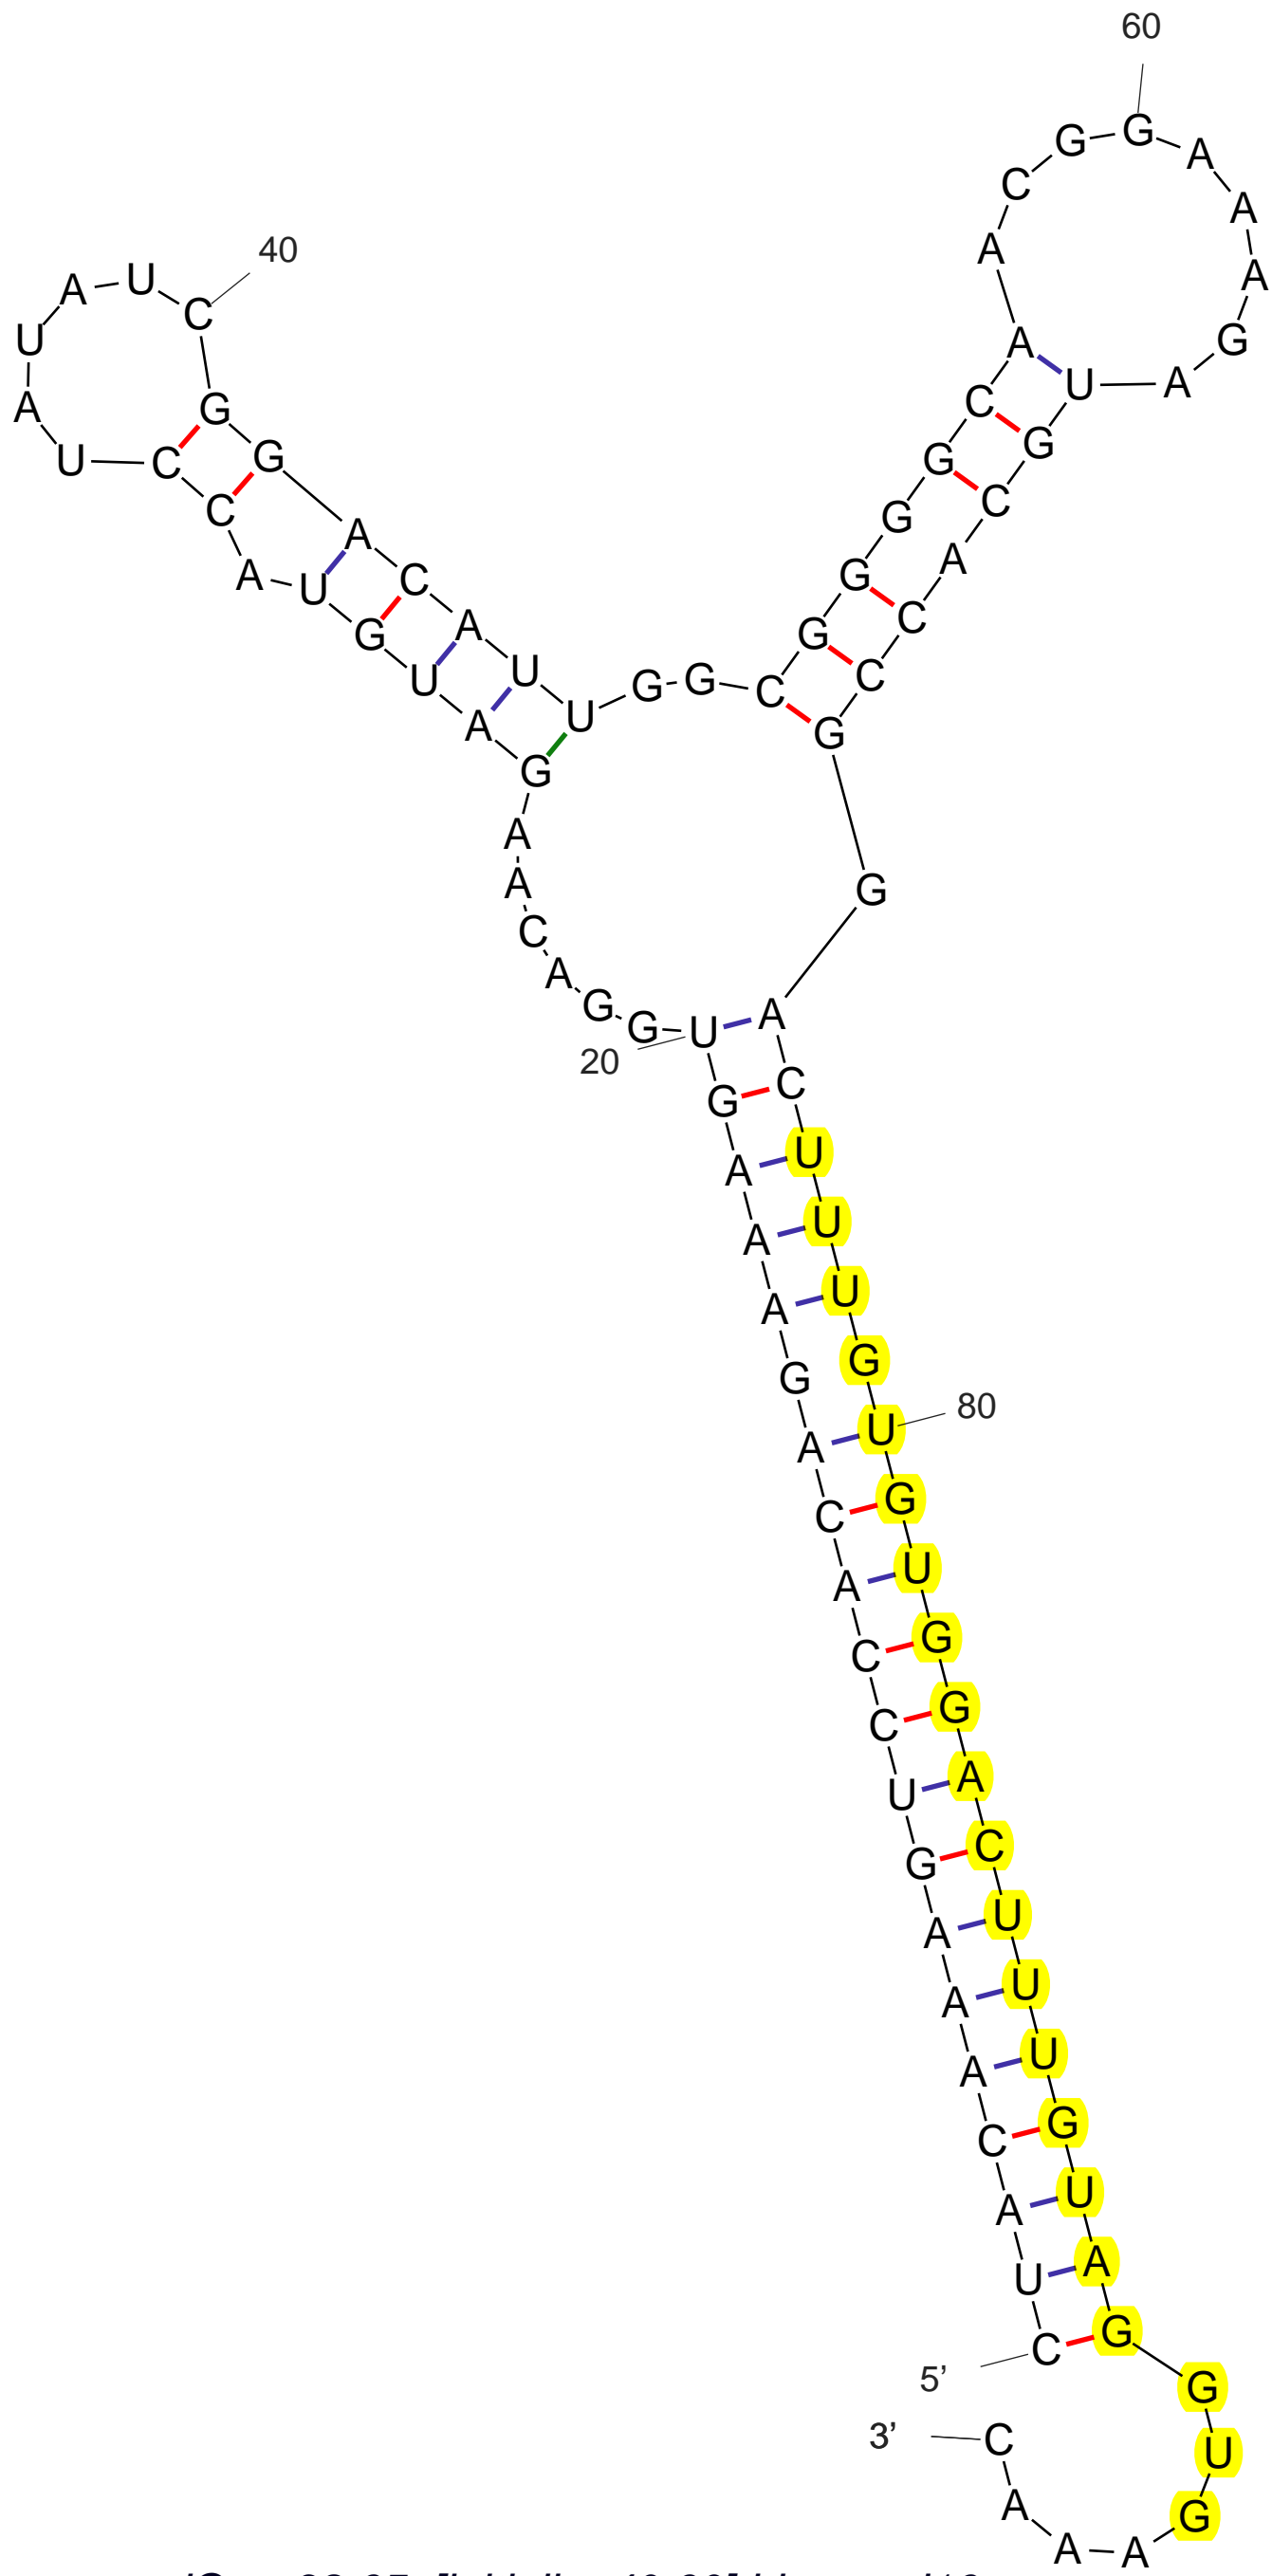

$dG = -38.65$  [initially -40.60] hbr-cand16



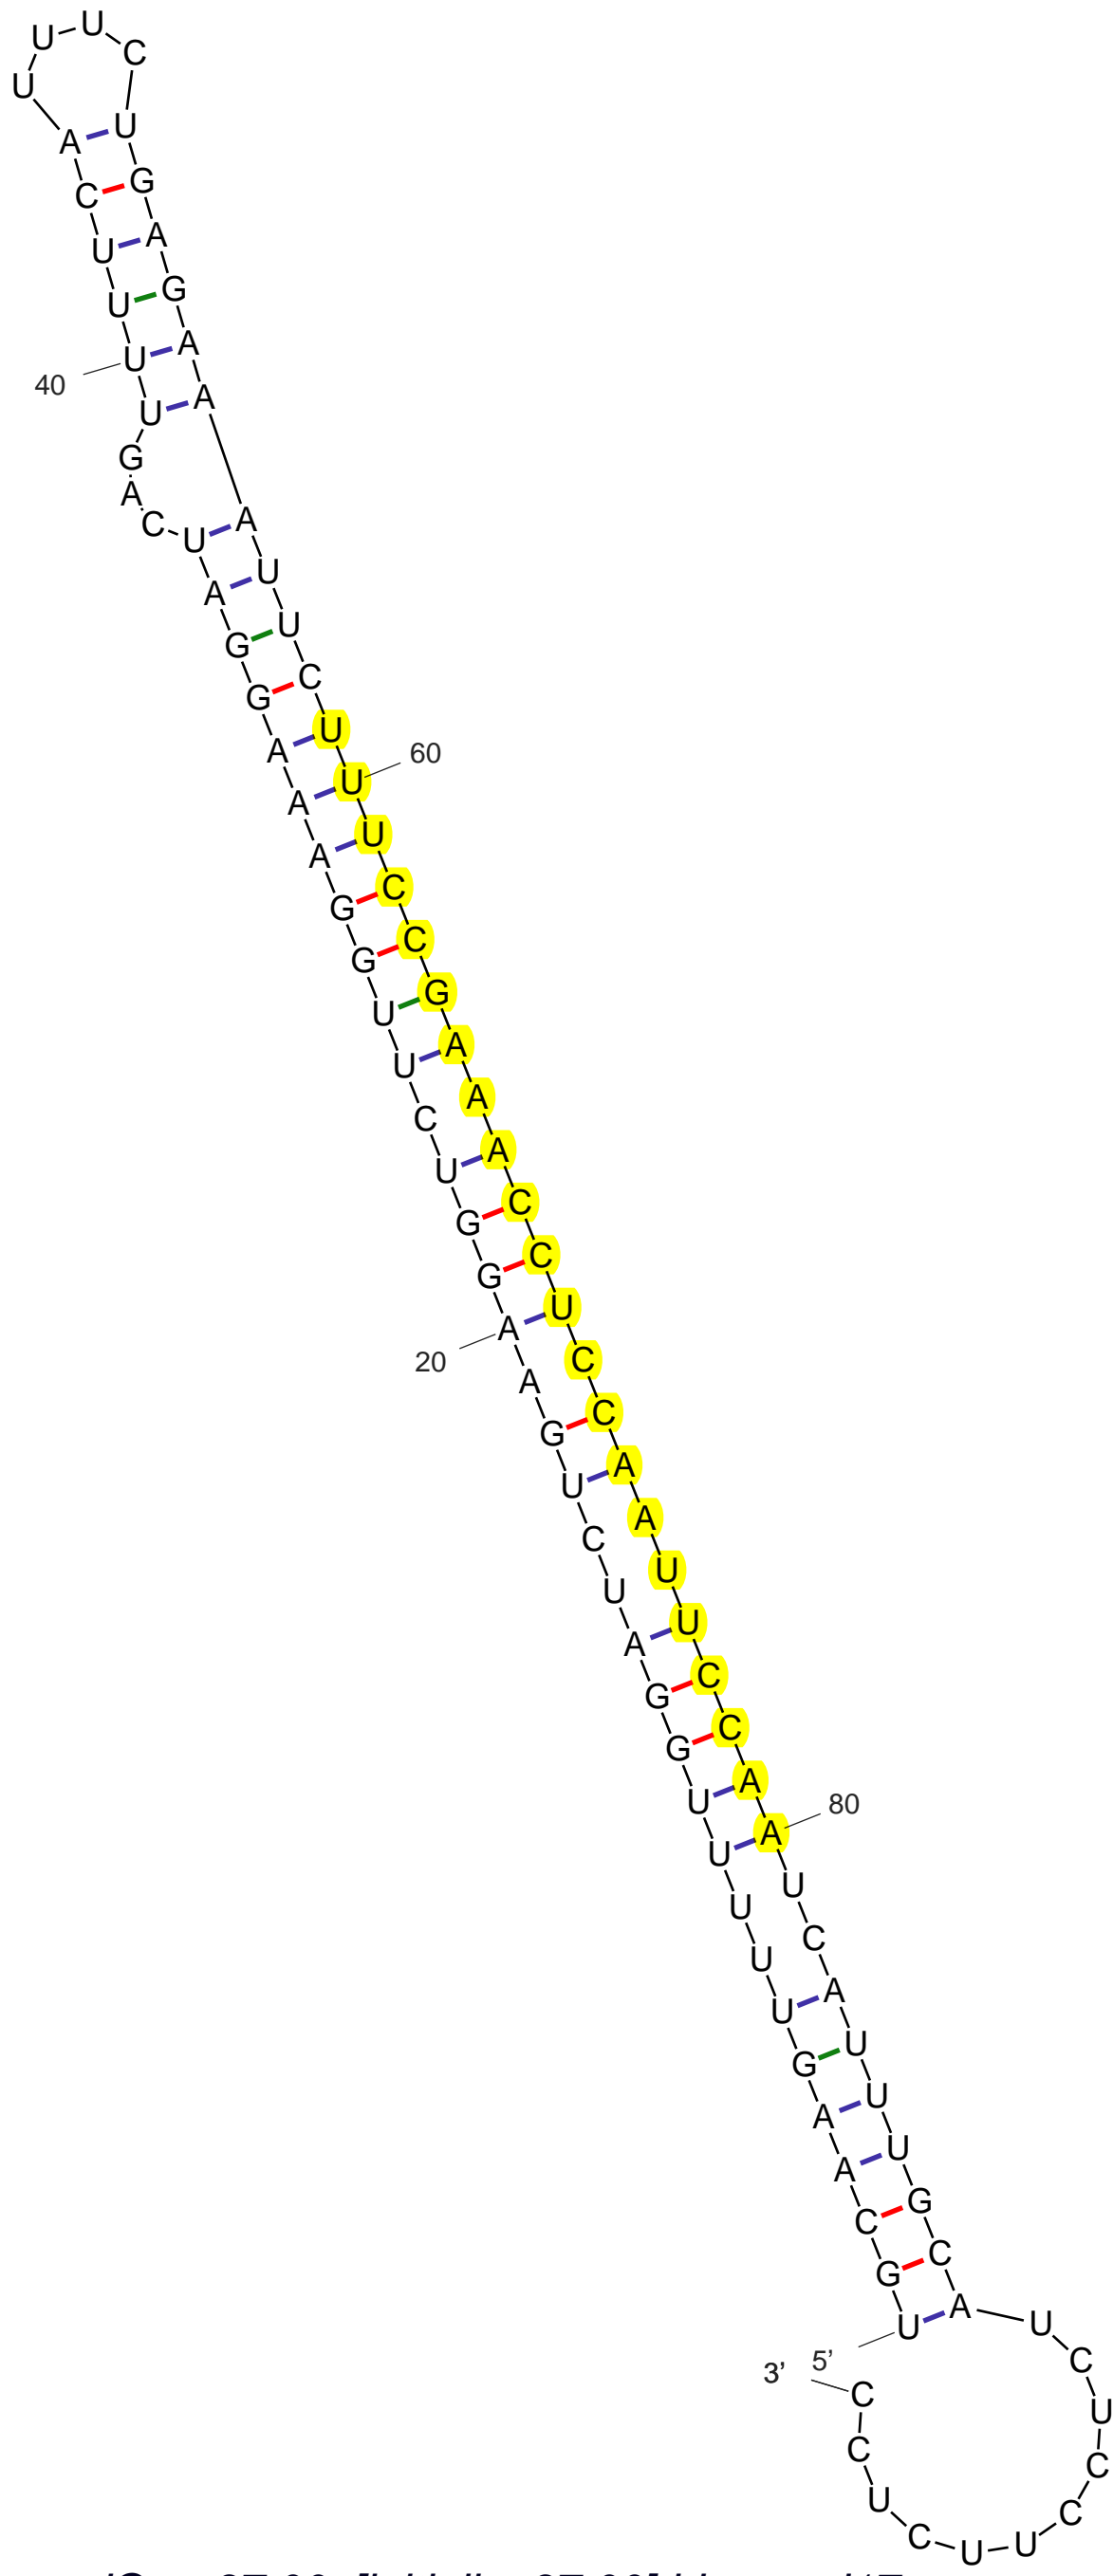

$dG = -37.00$  [initially -37.00] hbr-cand17

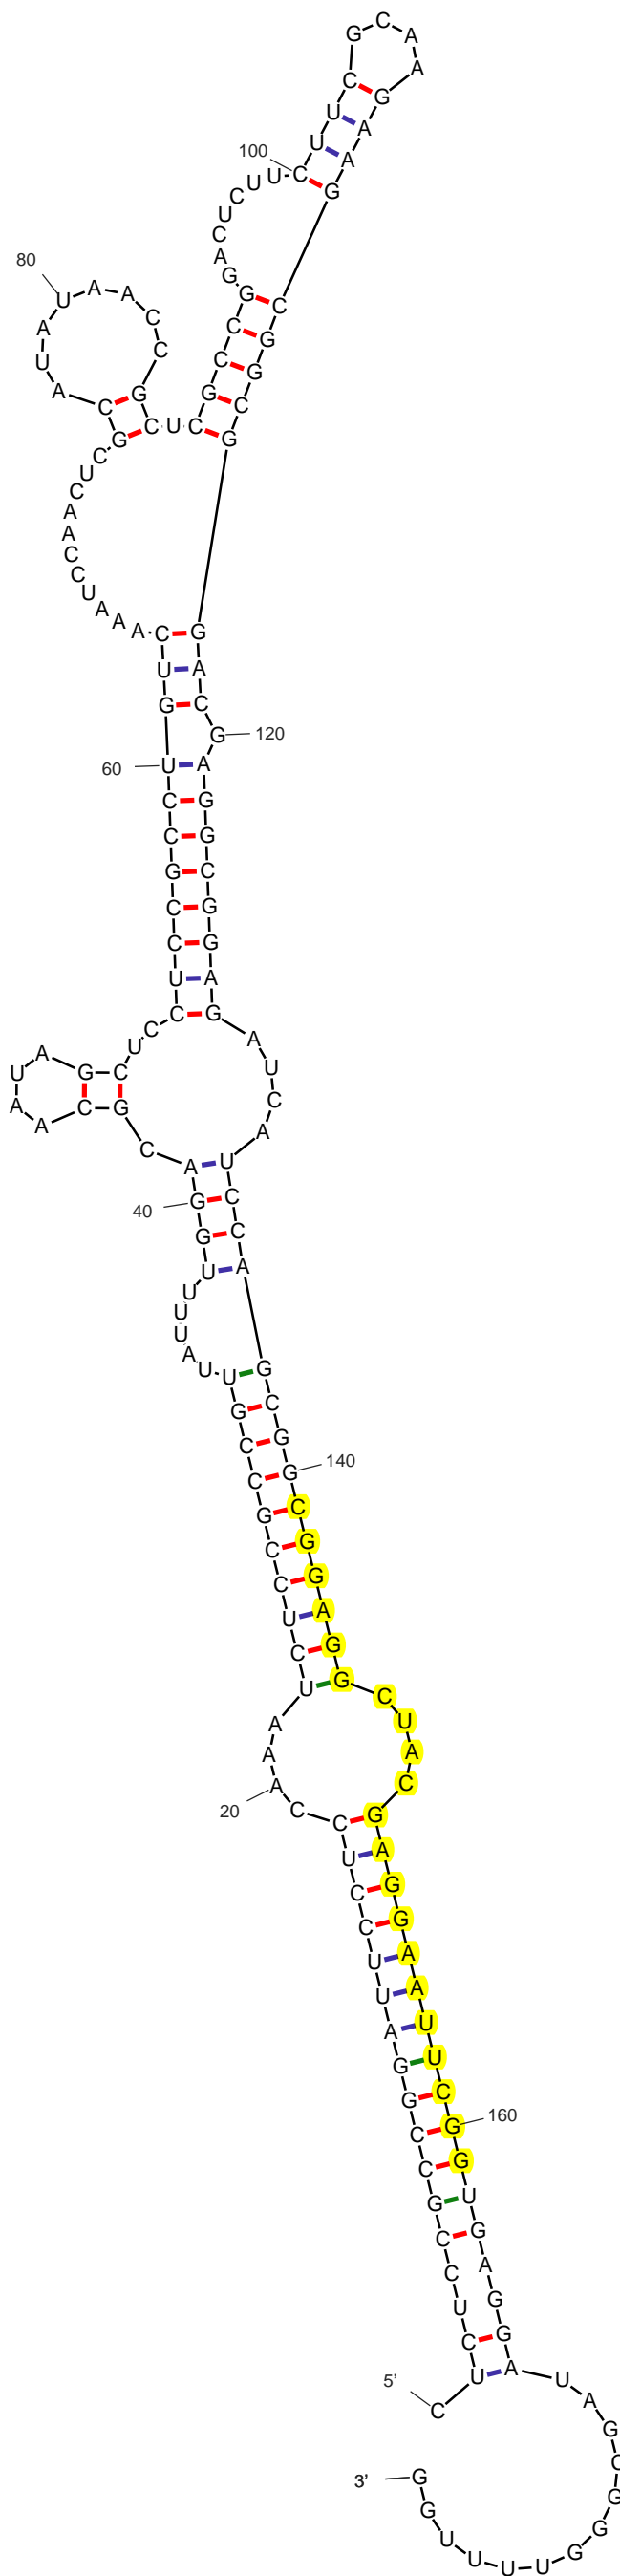

$dG = -76.77$  [initially  $-81.20$ ] *hbr-cand18*

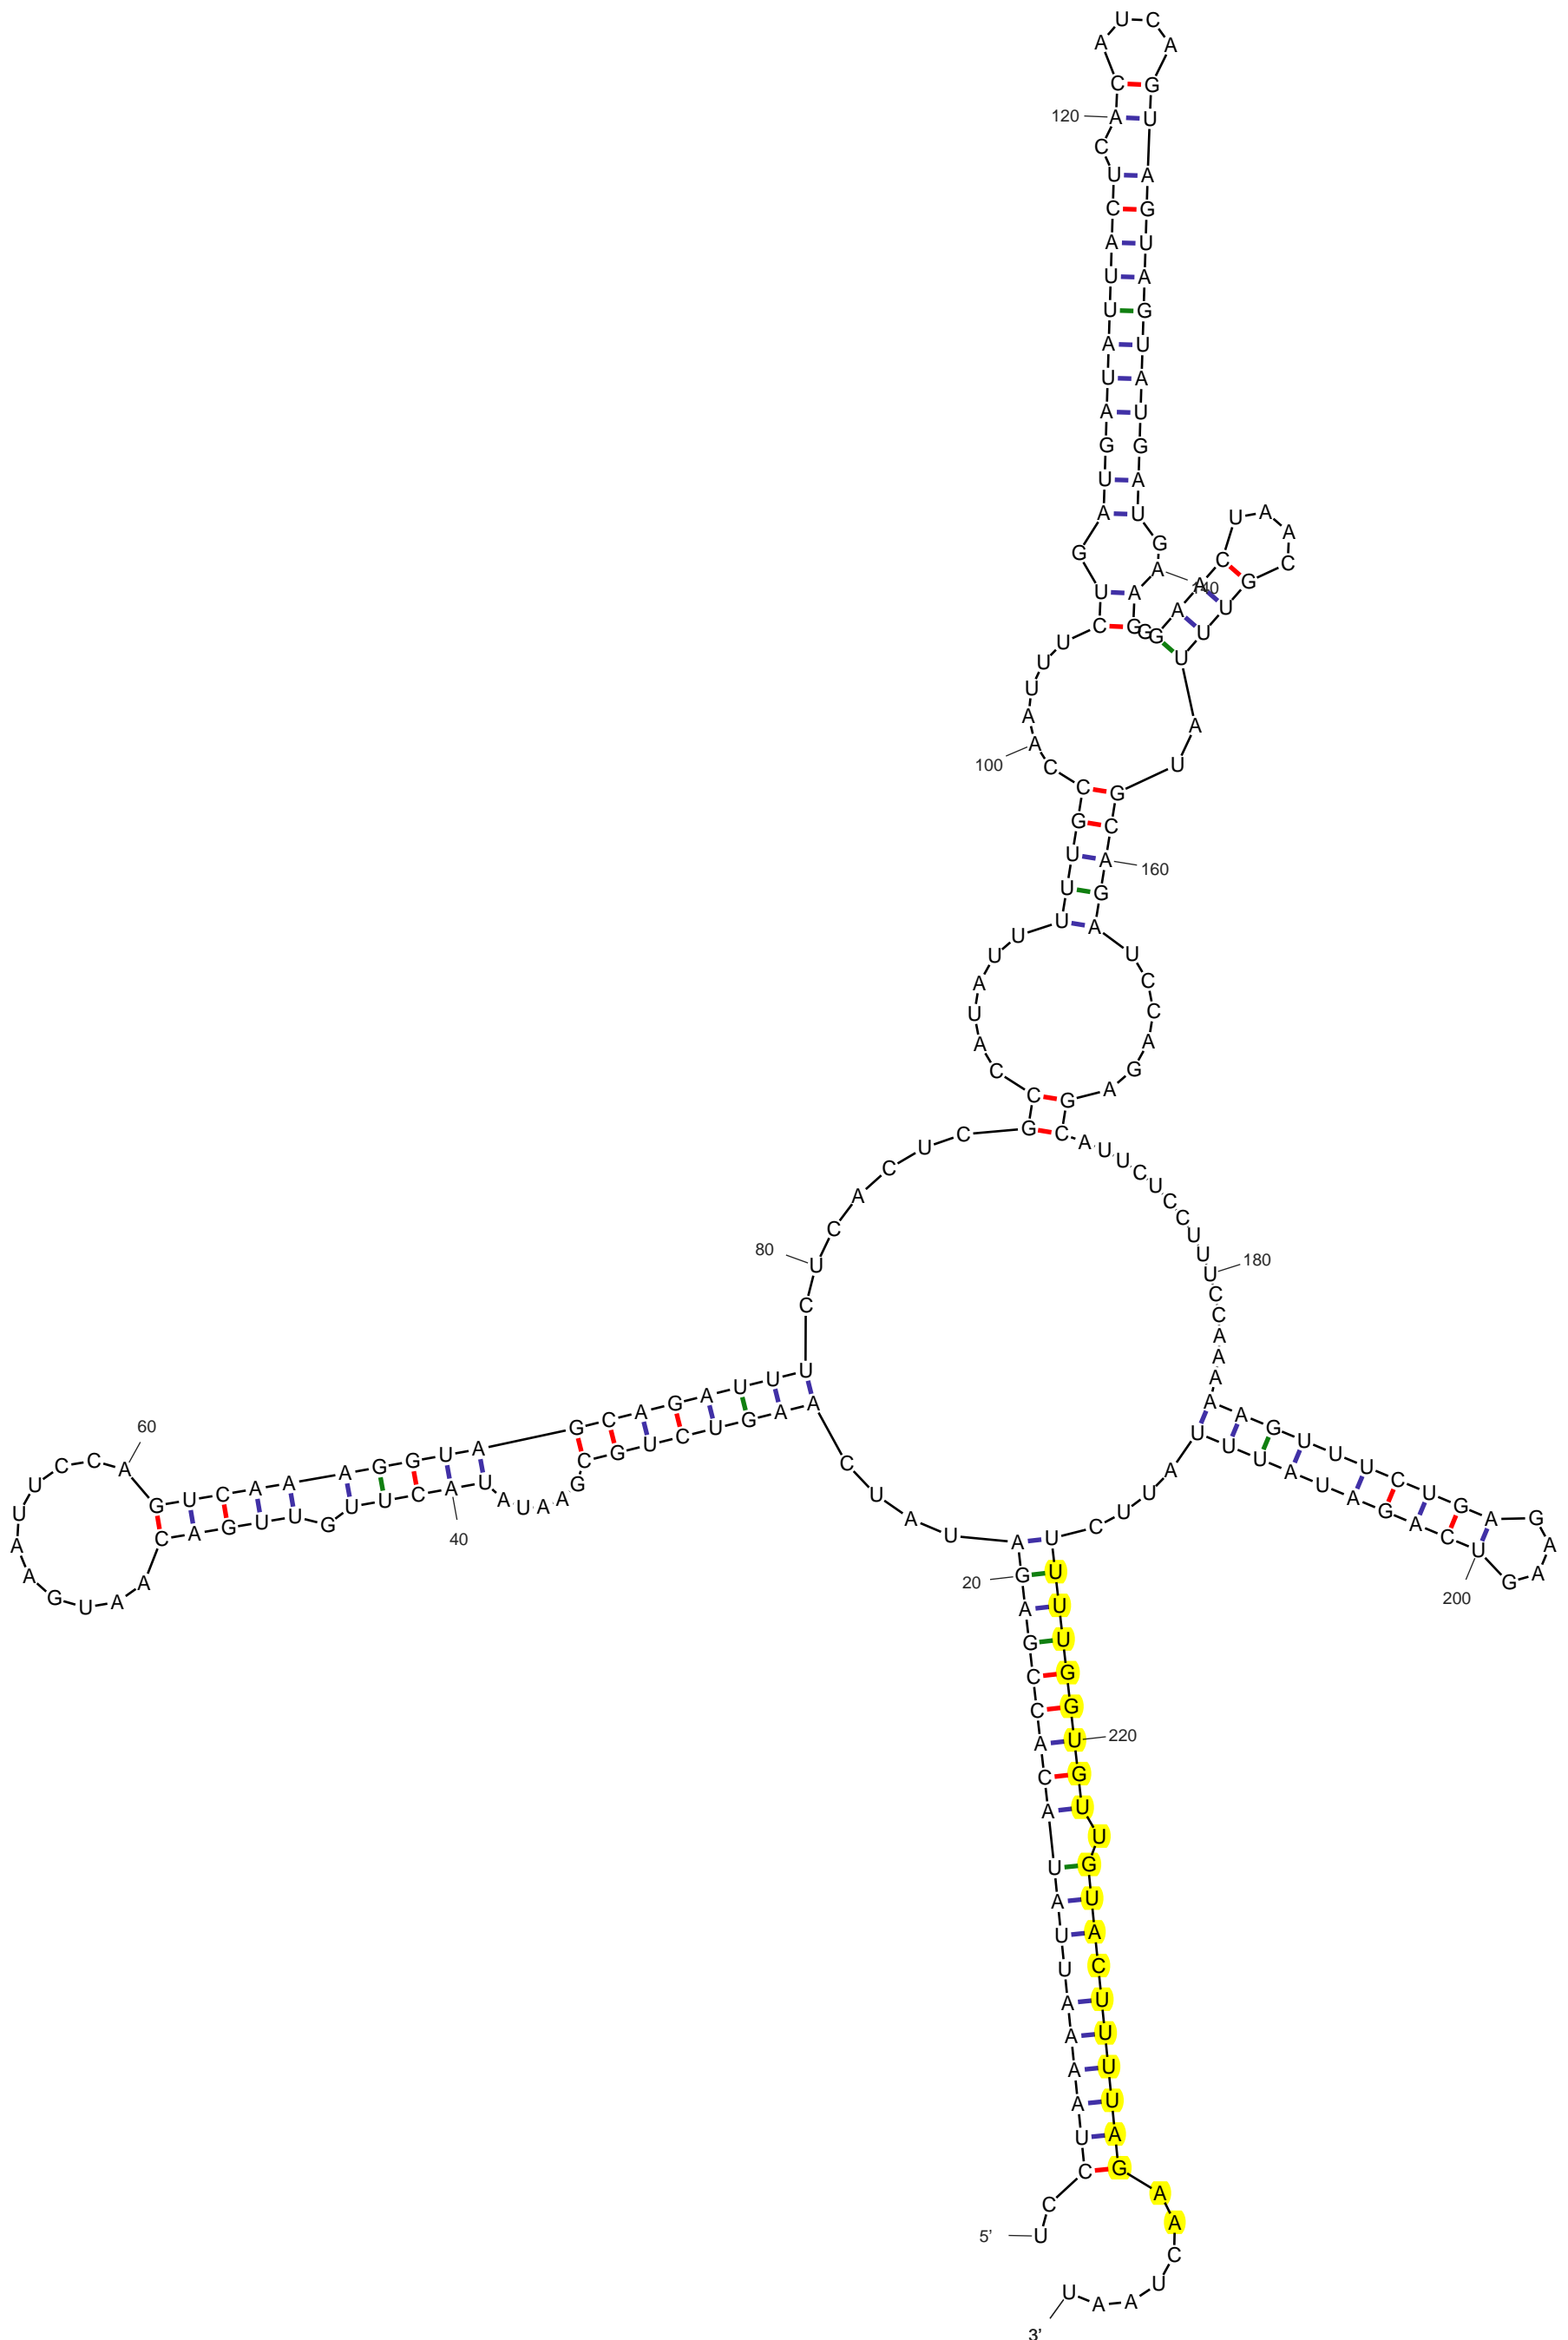

$dG = -48.48$  [initially -51.90] hbr-cand19

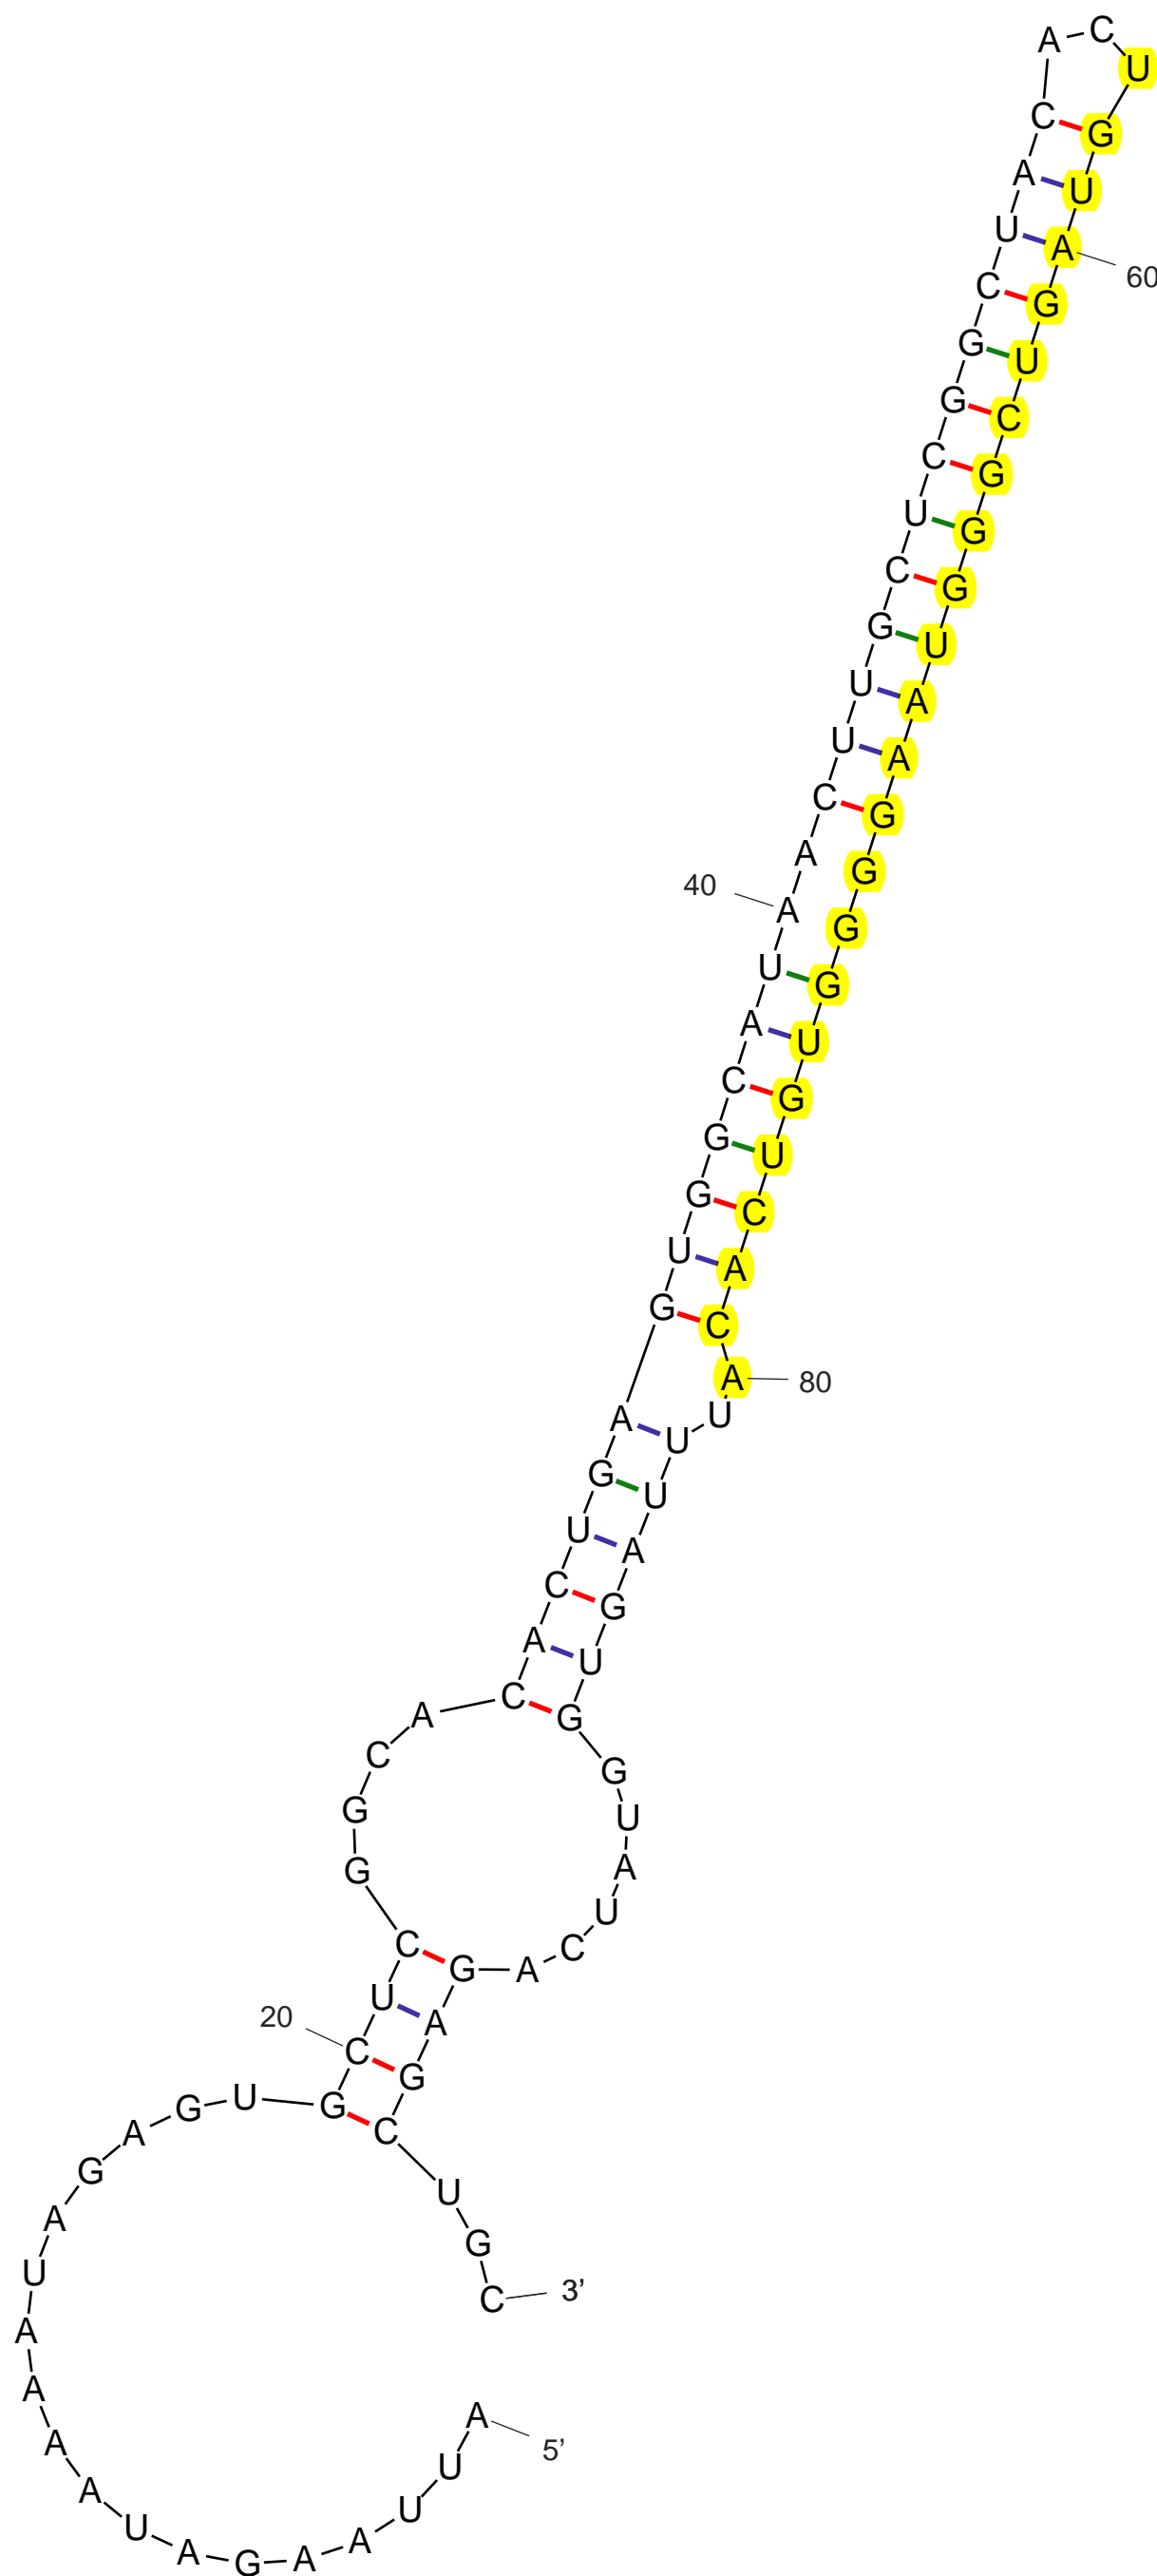

$dG = -42.30$  [initially -42.30] *hbr-cand20*
