# Supplementary material
Source: PubMed Central journal article supplement (PMC3405184)
Supplement: NIHMS365062-supplement-3.pdf [file NIHMS365062-supplement-3.pdf]

**Supplemental Table 1. Conserved miRNAs in rubber tree.**

| miRNA ID                | Mature miRNA             | Length | Read frequency (in TPM*) |        |        |         | Conservation in |         |        |
|-------------------------|--------------------------|--------|--------------------------|--------|--------|---------|-----------------|---------|--------|
|                         |                          |        | 217 m&                   | 217 y& | 260 m& | 260 y&  | Dicot           | Monocot | Other# |
| miR156/miR157           | UUGACAGAAGAUAGAGAGCAC    | 21     | 218                      | 214.4  | 342.9  | 388.8   | +               |         |        |
| miR158                  | UCCCAAUUGUAGACAAAGCA     | 20     | 17.4                     | 27.2   | 1      | 0.7     | +               |         |        |
| miR159                  | UUUGGAUUGAAGGGAGCUCUA    | 21     | 5322                     | 7201.1 | 6456.5 | 24147.5 | +               |         |        |
| miR160                  | UGCCUGGCUCCUGUAUGCCA     | 21     | 15.8                     | 5.1    | 10.3   | 17.7    | +               | +       | +      |
|                         | UGCCUGGCUCCUGAAUGCCA     | 21     | 45.7                     | 18.4   | 28.9   | 34      | +               | +       |        |
|                         | GCAUGAGGGGAGUCACGCAGG    | 21     | 0.3                      | 37     | 0.5    | 206.1   | +               |         |        |
| miR161                  | UUGAAAGUGACUACAUCGGGG    | 21     | 6.8                      | 41.2   | 0.5    | 0       | +               |         |        |
|                         | UGAAAGUGACUACAUCGGGGU    | 21     | 3.7                      | 10.5   | 0.4    | 0       | +               |         |        |
| miR162                  | UCGAUAAACCUCUGCAUCCAG    | 21     | 135.1                    | 134.5  | 211.5  | 562.4   | +               | +       |        |
| miR163                  | UUGAAGAGGACUUGGAACUUCGAU | 24     | 0.7                      | 3.2    | 0      | 0       | +               |         |        |
|                         | UUGAAGAGGACUUGGAACUUCGA  | 23     | 0                        | 0.9    | 0      | 0       | +               |         |        |
|                         | UUGAAGAGGACUUGGAACUUCG   | 22     | 0                        | 1.1    | 0      | 0       | +               |         |        |
| miR164                  | UGGAGAAGCAGGGCACGUGCA    | 21     | 45.9                     | 14.3   | 22     | 38.4    | +               | +       |        |
| miR165                  | UCGGACCAGGCUUCAUCCCC     | 21     | 2.5                      | 44     | 2      | 17.5    | +               |         |        |
| miR166                  | UCGGACCAGGCUUCAUCCCG     | 21     | 14.5                     | 283.9  | 8.5    | 1322.9  | +               |         |        |
|                         | UCGGACCAGGCUUCAUCCCC     | 21     | 175.1                    | 3622.1 | 233.2  | 1587.5  | +               | +       | +      |
| miR167                  | UGAAGCUGCCAGCAUGAUCUGA   | 22     | 4512                     | 2313.7 | 4428.2 | 1967.7  | +               | +       |        |
|                         | UGAAGCUGCCAGCAUGAUCUG    | 21     | 2021.1                   | 591.4  | 1916.6 | 579.6   | +               | +       |        |
| miR168                  | UCGCUUGGUGCAGGUCGGGAA    | 21     | 111.4                    | 41.8   | 156.7  | 69.9    | +               |         |        |
| miR169                  | UAGCCAAGGAUGACUUGCCCGU   | 22     | 1.2                      | 1.6    | 2.9    | 1.4     | +               |         |        |
|                         | UAGCCAAGGAUGACUUGCCCG    | 21     | 3.7                      | 8      | 7      | 3       | +               |         |        |
|                         | UAGAGCCAAGAAUGACUUGCCGG  | 23     | 12.2                     | 4.4    | 16.3   | 2.3     | +               |         |        |
|                         | UAGAGCCAAGAAUGACUUGCCGA  | 23     | 1.7                      | 0.2    | 2.9    | 0.7     | +               |         |        |
|                         | CAGCCAAGGAUGACUUGCCGG    | 21     | 0.1                      | 0.5    | 0      | 13.8    | +               | +       |        |
| AGAGCCAAGAAUGACUUGCCGGC | 23                       | 18.7   | 1                        | 8      | 0.9    | +       |                 |         |        |
| miR170                  | UGAUUGAGCCGUGUCAUAUUC    | 21     | 0                        | 0      | 0.3    | 2.4     | +               |         |        |
| miR171                  | UUGAGCCGUGCCAUAUUCACG    | 21     | 1.3                      | 1.4    | 0.5    | 18.6    | +               | +       |        |
|                         | UUGAGCCGCGUCAUAUUCUCU    | 21     | 18.2                     | 8      | 16.4   | 1.6     | +               |         |        |
|                         | UUGAGCCGCGUCAUAUUCUC     | 21     | 47.9                     | 17     | 49.8   | 5.8     | +               |         |        |
|                         | UGAUUGAGCCGUGCCAUAUUC    | 21     | 5.4                      | 0.8    | 4.4    | 39.6    | +               | +       |        |
| CGAGCCGAAUCAUAUUCACUC   | 21                       | 40.3   | 24.2                     | 9.7    | 1.9    | +       |                 |         |        |
| miR172                  | AGAAUCUUGAUGAUGCUGCAU    | 21     | 125.5                    | 10.8   | 110    | 58.7    | +               | +       |        |
| miR319                  | UUGGACUGAAGGGAGCUC       | 20     | 23.5                     | 155.9  | 62.3   | 2913.2  | +               | +       | +      |

|        |                         |    |        |        |         |        |   |   |   |
|--------|-------------------------|----|--------|--------|---------|--------|---|---|---|
| miR390 | AAGCUCAGGAGGGGAUAGCGCC  | 21 | 3.5    | 2.3    | 3.9     | 180.9  | + | + | + |
| miR393 | UCCAAAGGGGAUCGCAUUGAUU  | 22 | 0.4    | 3.9    | 0.8     | 2.2    | + | + |   |
|        | UCCAAAGGGGAUCGCAUUGAUC  | 22 | 1.2    | 1      | 4.6     | 1.3    | + | + |   |
|        | UCCAAAGGGGAUCGCAUUGAU   | 21 | 1.2    | 7.9    | 1.3     | 1.8    | + | + |   |
|        | UCCAAAGGGGAUCGCAUUGAUUU | 22 | 1.6    | 6.3    | 2.4     | 10.7   | + | + |   |
|        | UCCAAAGGGGAUCGCAUUGAUU  | 21 | 1.2    | 11.5   | 1.4     | 10.1   | + | + |   |
|        | UCCAAAGGGGAUCGCAUUGAUCU | 22 | 0.7    | 1.8    | 1       | 1.6    | + | + |   |
|        | UCCAAAGGGGAUCGCAUUGAUCC | 22 | 1.7    | 1.1    | 2       | 6.8    | + | + |   |
|        | UCCAAAGGGGAUCGCAUUGAUC  | 21 | 0.9    | 0.5    | 1.3     | 1.6    | + | + |   |
|        | UCCAAAGGGGAUCGCAUUGAU   | 20 | 0.1    | 1.9    | 0.3     | 0.9    | + | + |   |
| miR394 | UUGGCAUUCUGUCCACCUC     | 20 | 64.8   | 21.6   | 47.2    | 1059.5 | + | + |   |
| miR395 | CUGAAGUGUUUGGGGGAACUC   | 21 | 158.1  | 1128.3 | 43.9    | 29.6   | + |   |   |
| miR396 | UCCACAGCUUUCUUGAACUU    | 21 | 2298.6 | 1175   | 2430.2  | 7521   | + | + | + |
|        | UCCACAGCUUUCUUGAACUG    | 21 | 8041.1 | 3507.4 | 14830.1 | 9003.2 | + | + |   |
| miR397 | UCAUUGAGUGCAGCGUUGAUU   | 21 | 1.5    | 0      | 0.6     | 0      | + | + |   |
|        | UCAUUGAGUGCAGCGUUGAUG   | 21 | 9.5    | 2.6    | 2.1     | 0.9    | + | + |   |
|        | UCAUUGAGUGCAGCGUUGAU    | 20 | 4.5    | 0.3    | 1.1     | 0.4    | + | + |   |
| miR398 | UGUGUUCUCAGGUCGCCCCU    | 21 | 1.1    | 0.3    | 0.5     | 0      | + | + |   |
|        | UGUGUUCUCAGGUCGCCCCUG   | 21 | 1.1    | 0.5    | 0.4     | 0.4    | + | + |   |
|        | UGUGUUCUCAGGUCACCCCU    | 21 | 2.8    | 1      | 2.5     | 0.6    | + | + |   |
|        | UGUGUUCUCAGGUCACCCUG    | 21 | 0.8    | 0.7    | 0.1     | 0      | + |   |   |
| miR399 | UGCCAAAGGAGAUUUGCCCGG   | 21 | 0      | 1.8    | 0.1     | 0      | + |   |   |
|        | UGCCAAAGGAGAGUUGCCUUG   | 21 | 0      | 0      | 0       | 11.5   | + | + |   |
|        | UGCCAAAGGAGAGUUGCCUG    | 21 | 0      | 1.6    | 0       | 0      | + | + |   |
|        | UGCCAAAGGAGAAUUGCCCU    | 20 | 0.3    | 0.4    | 1       | 0.6    | + | + |   |
|        | CGCCAAAGGAGAGUUGCCCU    | 21 | 0.1    | 2.3    | 0.4     | 1.7    | + |   |   |
|        | CGCCAAAGGAGAGUUGCCUG    | 21 | 0.3    | 3.1    | 1.3     | 1.2    | + |   |   |
|        | ACGCCAAAGGAGAGUUGCCCU   | 21 | 0.3    | 3.4    | 0.4     | 3.5    | + |   |   |
| miR403 | UUAGAUUCACGCACAAACUCG   | 21 | 147.3  | 58.5   | 212.6   | 122.4  | + |   |   |
| miR408 | UGCACUGCCUCUCCUGGC      | 20 | 242.2  | 110.1  | 71.5    | 25.9   | + | + | + |
|        | AUGCACUGCCUCUCCUGGC     | 21 | 103.1  | 72     | 39      | 16     | + |   | + |
| miR447 | UAUGGAAGAAUUGUAGUAUU    | 21 | 0.4    | 0.9    | 0       | 0      | + |   |   |
| miR472 | UUUUUCCUACUCCGCCAUACC   | 22 | 0.2    | 2.3    | 0       | 0.1    | + |   |   |
|        | UUUUGCCUACUCCACCCAUCC   | 22 | 0.1    | 0      | 0.5     | 0.4    | + |   |   |
|        | UUUUCCCUACUCCACCCAUGCC  | 22 | 0.6    | 0      | 0.7     | 0.3    | + |   |   |

|         |                         |    |       |       |       |        |   |   |   |
|---------|-------------------------|----|-------|-------|-------|--------|---|---|---|
|         | UUUUCCCGAGACCUCCCAUCCC  | 22 | 0     | 0.2   | 0.6   | 0      | + |   |   |
|         | UUUUCCCACGACCUCCCAUACC  | 22 | 0.2   | 0     | 0.2   | 0.1    | + |   |   |
|         | UCUUCCCUACUCCACCCAUACC  | 22 | 0.2   | 0     | 0.3   | 0.1    | + |   | + |
| miR473  | ACUCUCCCUCAAGGGCUUCCA   | 21 | 29.3  | 11    | 6.3   | 1.4    | + |   |   |
| miR477  | ACUCUCCCUCAAGGGCUUCUC   | 21 | 10.7  | 4.1   | 2.3   | 3.2    | + |   |   |
| miR479  | CGUGAUAUUGGUACGGCUCauc  | 22 | 170.4 | 168.5 | 20.3  | 54.7   | + |   |   |
|         | CGUGAUAUUGGUACGGCUCau   | 21 | 33.3  | 32.7  | 8.6   | 18.2   | + |   |   |
| miR482  | UCUUGCCUACUCCACCCAUuCC  | 22 | 183.8 | 68.3  | 186.6 | 167.9  | + |   |   |
|         | UCUUGCCUACGCCACCCAUuCC  | 22 | 75.9  | 36    | 77.8  | 66.8   | + |   |   |
|         | UCUUCCCUACUCCACCCAUGCC  | 22 | 252.5 | 113.5 | 199.3 | 109.1  | + |   |   |
| miR530  | UGCAUUUGCACCUGCACCUUC   | 21 | 0.6   | 0     | 2     | 0      | + |   |   |
|         | UGCAUUUGCACCUGCACCUUA   | 21 | 5.3   | 1.5   | 9.2   | 1.8    | + |   |   |
| miR535  | UGACGAUGAGAGAGAGCACAC   | 21 | 5     | 1.4   | 11.5  | 0.6    | + |   |   |
|         | UGACGACGAGAGAGAGCACGC   | 21 | 14.8  | 10.7  | 19.4  | 4.5    | + | + | + |
|         | UGACAACGAGAGAGAGCACGU   | 21 | 44.9  | 7     | 78.8  | 13.3   | + | + | + |
| miR775  | UUCGAUGUCUAGCAGUGCCA    | 20 | 0.4   | 0.2   | 0     | 0      | + |   |   |
| miR824  | UAGACCAUUUGUGAGAAGGGA   | 21 | 0.9   | 0     | 0     | 0      | + |   |   |
| miR827  | UUAGAUGACCAUCAACAAACU   | 21 | 1.4   | 0.9   | 1     | 0.1    | + |   |   |
|         | UUAGAUGACCAUCAACAAACA   | 21 | 0.4   | 0.2   | 0.3   | 0.4    | + |   |   |
| miR843  | UUUAGGUCGAGCUUCAUUGGA   | 21 | 0.6   | 0.9   | 0.1   | 0      | + |   |   |
|         | UUAGGUCGAGCUUCAUUGGAA   | 21 | 0.5   | 1.5   | 0     | 0      | + |   |   |
| miR858  | UUCGUUGUCUGUUCGACCUUG   | 21 | 337   | 360.5 | 373.5 | 3934.4 | + |   |   |
| miR1507 | UCUCAUCCAUAACAUCGUCUGA  | 22 | 11.8  | 0     | 0.7   | 0      | + |   |   |
| miR1508 | UAGAAAGGGAAAUAGCAGUUG   | 21 | 10    | 0     | 0.7   | 0      | + |   |   |
| miR1509 | UUAUAUCAAGGAAAUCACGGUUG | 22 | 3.1   | 0     | 0.3   | 0      | + |   |   |
|         | UUAUAUCAAGGAAAUCACGGUCG | 22 | 9.4   | 0     | 1     | 0      | + |   |   |
| miR1510 | UGUUGUUUUACCUAUUCCACCU  | 22 | 2.2   | 0     | 0     | 0      | + |   |   |
|         | UGUUGUUUUACCUAUUCCACCC  | 22 | 0.8   | 0     | 0     | 0      | + |   |   |
|         | UGUUGUUUUACCUAUUCCACC   | 21 | 0.6   | 0     | 0     | 0      | + |   |   |
| miR1511 | AACCAGGCUCUGAUACCAUGG   | 21 | 88.5  | 0     | 3.1   | 0      | + |   |   |
| miR1512 | UAACUGGAAAUUCUAAAAGCAU  | 22 | 0.6   | 0     | 0     | 0      | + |   |   |
| miR1515 | UCAUUUUGCGUGCAAUGAUCUG  | 22 | 0.7   | 0     | 0     | 0      | + |   |   |
| miR2109 | UGCGAGUGUCUUCGCCUCUGAU  | 22 | 9.3   | 0     | 0.1   | 0      | + |   |   |
|         | UGCGAGUGUCUUCGCCUCUGAA  | 22 | 6.4   | 0     | 0.3   | 0      | + |   |   |
|         | UGCGAGUGUCUUCGCCUCUGA   | 21 | 5.1   | 0     | 0     | 0      | + |   |   |

|         |                         |    |       |       |       |      |   |  |  |
|---------|-------------------------|----|-------|-------|-------|------|---|--|--|
| miR2111 | UAAUCUGCAUCCUGAGGUUUU   | 21 | 0.2   | 0     | 0.3   | 0    | + |  |  |
|         | UAAUCUGCAUCCUGAGGUUUU   | 20 | 0.6   | 0     | 0.2   | 0    | + |  |  |
|         | UAAUCUGCAUCCUGAGGUGUA   | 21 | 2.3   | 0     | 0     | 0    | + |  |  |
| miR2118 | UUGCCGAUUCCACCCAUUCCUA  | 22 | 12.2  | 0     | 0.4   | 0    | + |  |  |
| miR2911 | GGCCGGGGGACGGACUGGGAA   | 21 | 57    | 103.1 | 47    | 7.8  | + |  |  |
|         | GGCCGGGGGACGGACUGGGGA   | 20 | 248.8 | 433.9 | 118.6 | 16.7 | + |  |  |
|         | CGGCCGGGGGACGGACUGGGGA  | 21 | 140.2 | 59.6  | 79.8  | 9.5  | + |  |  |
| miR2916 | UGGGGGCUCGAAGACGAUCAGAU | 23 | 5.3   | 5.7   | 2.7   | 0.4  | + |  |  |
| miR2950 | UUCCAUCUCUUGCACACUGGA   | 21 | 2.9   | 0.9   | 0.7   | 7.4  | + |  |  |
| miR4413 | UAAGAGAAUUGUAAGUCACUG   | 21 | 0.9   | 0     | 0.1   | 0    | + |  |  |
| miR4414 | AGCUCGUCGAGUCGUUGGUUC   | 20 | 0.3   | 0     | 0.1   | 1.2  | + |  |  |
| miR5139 | CGAAACCUGGCUCUGAUACCA   | 21 | 0.3   | 0.2   | 0.1   | 1.1  | + |  |  |

\* TPM: transcripts per million

& m: mature leaves; v: young leaves; 217 and 260 represent two rubber tree clones.

# "Other" includes all non seed plants for which miRNAs are known.
