# Supplementary material
Source: PubMed Central journal article supplement (PMC3405184)
Supplement: NIHMS365062-supplement-4.pdf [file NIHMS365062-supplement-4.pdf]

**Supplemental Table 2. Rubber tree miRNA\*s from conserved miRNA loci.**

| miRNA_ID        | Mature miRNA            | Length | Read frequency (in TPM*) |        |        |        | Conservation in |         |        |
|-----------------|-------------------------|--------|--------------------------|--------|--------|--------|-----------------|---------|--------|
|                 |                         |        | 217_m&                   | 217_y& | 260_m& | 260_y& | Dicot           | Monocot | Other# |
| miR156*         | UGCUCACCUCUCUUUCUGUCAGU | 23     | 18.4                     | 1.2    | 1.2    | 0      | +               |         |        |
| miR157*         | GCUCUCUAUGCUUCUGUCAUC   | 21     | 19.8                     | 6.1    | 13.7   | 0.6    | +               |         |        |
| miR159*         | GAGCUCCUUGAAGUCCAAUAG   | 21     | 9.1                      | 4.3    | 3.6    | 12.1   | +               |         |        |
| miR160*         | GCGUAUGAGGAGCCAUGCAUA   | 21     | 0.6                      | 0.3    | 0.4    | 0.6    | +               |         |        |
| miR162*         | UGGAGGCAGCGGUUCAUCGAUC  | 22     | 0.5                      | 0.4    | 0.2    | 0      | +               |         |        |
| miR164*         | CAUGUGCCCCGUCUUCSCCAUC  | 21     | 1.6                      | 0.4    | 1.9    | 0.6    | +               | +       |        |
|                 | CAUGUGCCCCUCUUCSCCAUC   | 21     | 1.9                      | 1.2    | 1      | 3.1    | +               | +       |        |
| miR165*         | GAAUGUUGUCUGGUUCGAUG    | 20     | 0.1                      | 0      | 0.4    | 0.7    | +               |         |        |
| miR166*         | GGAAUGUUGUCUGGCUCGAGG   | 21     | 268.2                    | 39.1   | 176    | 233.3  | +               | +       |        |
|                 | GAAUGUUGUCUGGCUCGAGGA   | 21     | 7.8                      | 5.5    | 12     | 56.8   | +               | +       |        |
| miR167*         | GGUCAUGCUCUGACAGCCUCACU | 23     | 0.3                      | 0.3    | 0.2    | 0.1    | +               |         |        |
|                 | AGGUCAUCUUGCAGCUUCAU    | 21     | 1.1                      | 0.9    | 0.8    | 0.6    | +               |         |        |
| miR168*         | CCCGCCUUGCAUCAACUGAAU   | 22     | 1.1                      | 0.4    | 1.4    | 4.3    | +               |         |        |
|                 | CCCGCCUUGCAUCAACUGAAU   | 21     | 5                        | 3.9    | 3      | 24.8   | +               |         |        |
| miR170*/miR171* | UAUUGGCCUGGUUCACUCAGA   | 21     | 7.5                      | 14.1   | 5      | 1721.5 | +               |         |        |
| miR172*         | GUAGCAUCAUCAAGAUUCACA   | 21     | 0.2                      | 0      | 0      | 2      | +               |         |        |
|                 | GUAGCACCAUCAAGAUUCACA   | 21     | 0.3                      | 0.9    | 0.2    | 1.8    | +               |         |        |
|                 | GUAGCACCAUCAAGAUUCAC    | 20     | 0.9                      | 0.5    | 0.7    | 3.3    | +               |         |        |
| miR390*         | CGCUAUCCAUCCUGAGUUUCA   | 21     | 0.9                      | 0      | 0.7    | 10.6   | +               |         |        |
|                 | CGCUAUCCAUCCUGAGUUUA    | 21     | 0.4                      | 0      | 0.2    | 1.4    | +               |         |        |
|                 | CGCUAUCCAUCCUGAGUUUA    | 20     | 0.1                      | 0.5    | 0.2    | 0.6    | +               |         |        |
| miR393*         | AUCAUGCUAUCCCUUUGGAU    | 21     | 1.2                      | 0.5    | 0.8    | 1.9    | +               |         |        |
| miR395*         | GUUCCCCUGAGCACUUCAU     | 20     | 0                        | 0      | 0.4    | 0.8    | +               |         |        |
| miR396*         | UUCAAUAAAGCUGUGGGAAG    | 20     | 239.1                    | 258.2  | 214.9  | 181.4  | +               |         |        |
|                 | GUUCAAUAAAGCUGUGGGAAG   | 21     | 315.8                    | 430.4  | 239.4  | 1745.6 | +               |         |        |
|                 | GCUCAAGAAAGCUGUGGGAAG   | 21     | 40.9                     | 33.7   | 31.1   | 1486.1 | +               |         |        |
|                 | CUCAAGAAAGCUGUGGGAAG    | 20     | 267.8                    | 322.6  | 144.7  | 892.1  | +               |         |        |
| miR398*         | GGGUUGAUUUGAGAACACACG   | 21     | 0                        | 1.8    | 0      | 0      | +               |         |        |
| miR447*         | UGAGGUCUUUGGGGAGAGUGG   | 21     | 0.9                      | 0.2    | 0.9    | 0.6    | +               |         |        |
| miR482*         | GGAAUGGGCUGAUUGGGAAGU   | 21     | 13.9                     | 1      | 0.6    | 0.3    | +               |         |        |
|                 | GGAAUGGGCUGAUUGGGAAGC   | 21     | 60.3                     | 0.4    | 2.3    | 0.3    | +               |         |        |
| miR1510*        | UGGGAGGUAUUGGUAAGACAA   | 21     | 0.3                      | 0.3    | 0.4    | 0      | +               |         |        |

|          |                        |    |     |     |     |     |   |  |  |
|----------|------------------------|----|-----|-----|-----|-----|---|--|--|
| miR3623* | UGGUGUUUGGAUGAGCUUGUGA | 22 | 1.5 | 1.9 | 3   | 1.6 | + |  |  |
| miR3630* | UUUGGGAAUCUCUCUGAUGCUG | 22 | 0.1 | 0.3 | 0   | 0.3 | + |  |  |
| miR3633* | GUUCCCAUGCCACCCAUUUCUA | 22 | 0.4 | 0   | 0.2 | 4   | + |  |  |

\* TPM: transcripts per million

& m: mature leaves: v: young leaves: 217 and 260 represent two rubber tree clones.

# "Other" includes all non seed plants for which miRNAs are known.
