# Supplementary material
Source: PubMed Central journal article supplement (PMC3405184)
Supplement: NIHMS365062-supplement-5.pdf [file NIHMS365062-supplement-5.pdf]

**Supplemental Table 3. Predicted targets of conserved miRNAs found in rubber tree.**

| miRNA ID      | Target Acc.# | Database&    | Expectation* | Target Description                                                            |
|---------------|--------------|--------------|--------------|-------------------------------------------------------------------------------|
| miR156/miR157 | DV455740     | Cassava      | 0            | similar to UniRef100_A7QPU0 Cluster: Chromosome chr10 scaffold_138            |
|               | DV132465     | Leafy spurge | 1            | weakly similar to UniRef100_A7QP50 Cluster: Chromosome chr1 scaffold_136      |
|               | DV135850     | Leafy spurge | 1            | homologue to UniRef100_A7PKG5 Cluster: Chromosome chr15 scaffold_19           |
|               | DV136132     | Leafy spurge | 1            | homologue to UniRef100_A7PKG5 Cluster: Chromosome chr15 scaffold_19           |
|               | DV141568     | Leafy spurge | 1            | similar to UniRef100_Q94JW8 Cluster: Squamosa promoter-binding-like protein 6 |
|               | TC7036       | Leafy spurge | 1            | similar to UniRef100_A7P2C9 Cluster: Chromosome chr1 scaffold_5               |
|               | EC604194.1   | rubber tree  | 2            | Y28H04 YLX600 Hevea brasiliensis cDNA clone Y28H04 5'                         |
|               | EC604640.1   | rubber tree  | 2            | Y07D05 YLX600 Hevea brasiliensis cDNA clone Y07D05 5'                         |
|               | EC605123.1   | rubber tree  | 2            | Y81F10 YLX600 Hevea brasiliensis cDNA clone Y81F10 5'                         |
|               | EC605147.1   | rubber tree  | 2            | Y67E08 YLX600 Hevea brasiliensis cDNA clone Y67E08 5'                         |
|               | TC5455       | Leafy spurge | 2            | similar to UniRef100_A7QP31 Cluster: Chromosome chr1 scaffold_136             |
|               | DV456109     | Cassava      | 2            | similar to UniRef100_A7QP31 Cluster: Chromosome chr1 scaffold_136             |
|               | FF380924     | Cassava      | 2            | similar to UniRef100_A7PKG5 Cluster: Chromosome chr15 scaffold_19             |
|               | TC3767       | Cassava      | 2            | similar to UniRef100_A7P2C9 Cluster: Chromosome chr1 scaffold_5               |
|               | DV137216     | Leafy spurge | 2.5          | similar to UniRef100_Q8H1Z0 Cluster: Protein WAX2                             |
|               | DB927340     | Cassava      | 2.5          | similar to UniRef100_Q6NNK6 Cluster: At3g04040                                |
|               | EC608563.1   | rubber tree  | 3            | Y28F09 YLX600 Hevea brasiliensis cDNA clone Y28F09 5'                         |
|               | DV123826     | Leafy spurge | 3            | homologue to UniRef100_Q480W3 Cluster: Zinc carboxypeptidase family protein   |
|               | DV148051     | Leafy spurge | 3            | similar to UniRef100_A7PFH6 Cluster: Chromosome chr11 scaffold_14             |
|               | CK650833     | Cassava      | 3            |                                                                               |
|               | DB928939     | Cassava      | 3            | similar to UniRef100_A7PZI1 Cluster: Chromosome chr15 scaffold_40             |
|               | TC7560       | Cassava      | 3            | similar to UniRef100_A7PZI1 Cluster: Chromosome chr15 scaffold_40             |
|               | miR158       | TC4910       | Cassava      | 2                                                                             |
| DV144951      |              | Leafy spurge | 2.5          | similar to UniRef100_A7P2A5 Cluster: Chromosome chr19 scaffold_4              |
| TC1886        |              | Leafy spurge | 2.5          | similar to UniRef100_A7P2A5 Cluster: Chromosome chr19 scaffold_4              |
| DV129743      |              | Leafy spurge | 3            | similar to UniRef100_A7P3I5 Cluster: Chromosome chr1 scaffold_5               |
| DV138677      |              | Leafy spurge | 3            | similar to UniRef100_Q4T9P9 Cluster: Chromosome undetermined SCAF7512         |
| DV138677      |              | Leafy spurge | 3            | similar to UniRef100_Q4T9P9 Cluster: Chromosome undetermined SCAF7512         |
| DB924580      |              | Cassava      | 3            |                                                                               |
| TC7756        |              | Cassava      | 3            | similar to UniRef100_A7PG82 Cluster: Chromosome chr6 scaffold_15              |
| miR159        | DV152139     | Leafy spurge | 1            |                                                                               |
|               | DV147064     | Leafy spurge | 1.5          | similar to UniRef100_A8MQF9 Cluster: Uncharacterized protein At1g14270.2      |
|               | DV145459     | Leafy spurge | 2            | UniRef100_Q0JPA4 Cluster: Cyclin-A1-2                                         |

|        |            |              |     |                                                                                                                         |
|--------|------------|--------------|-----|-------------------------------------------------------------------------------------------------------------------------|
|        | TC3435     | Cassava      | 2   | weakly similar to UniRef100_A7QWQ7 Cluster: Chromosome chr16 scaffold_207                                               |
|        | DV140960   | Leafy spurge | 2.5 | similar to UniRef100_A7PXR9 Cluster: Chromosome chr15 scaffold_37                                                       |
|        | CK644396   | Cassava      | 2.5 | homologue to UniRef100_Q06H33 Cluster: Transcription factor Myb1                                                        |
|        | DV127919   | Leafy spurge | 3   |                                                                                                                         |
|        | DB920109   | Cassava      | 3   | similar to UniRef100_A7NTQ9 Cluster: Chromosome chr18 scaffold_1                                                        |
|        | DB923332   | Cassava      | 3   | homologue to UniRef100_A7UR41 Cluster: AGAP002158-PA                                                                    |
|        | DV448259   | Cassava      | 3   | similar to UniRef100_A7PPJ3 Cluster: Chromosome chr8 scaffold_23                                                        |
| miR160 | EC602463.1 | rubber tree  | 0   | Y63G07 YLX600 Hevea brasiliensis cDNA clone Y63G07 5'                                                                   |
|        | EC608866.1 | rubber tree  | 0   | Y17B07 YLX600 Hevea brasiliensis cDNA clone Y17B07 5'                                                                   |
|        | TC441      | Leafy spurge | 0   | similar to UniRef100_A7Nzk3 Cluster: Chromosome chr6 scaffold_3                                                         |
|        | TC4973     | Leafy spurge | 0   | similar to UniRef100_A7Nzk3 Cluster: Chromosome chr6 scaffold_3                                                         |
|        | CK642921   | Cassava      | 0   | similar to UniRef100_A7Nzk3 Cluster: Chromosome chr6 scaffold_3                                                         |
|        | TC9745     | Leafy spurge | 0.5 | similar to UniRef100_A7PT37 Cluster: Chromosome chr8 scaffold_29                                                        |
|        | DV446894   | Cassava      | 0.5 | similar to UniRef100_A7PT37 Cluster: Chromosome chr8 scaffold_29                                                        |
|        | EC602463.1 | rubber tree  | 1   | Y63G07 YLX600 Hevea brasiliensis cDNA clone Y63G07 5'                                                                   |
|        | EC608866.1 | rubber tree  | 1   | Y17B07 YLX600 Hevea brasiliensis cDNA clone Y17B07 5'                                                                   |
|        | TC441      | Leafy spurge | 1   | similar to UniRef100_A7Nzk3 Cluster: Chromosome chr6 scaffold_3                                                         |
|        | TC4973     | Leafy spurge | 1   | similar to UniRef100_A7Nzk3 Cluster: Chromosome chr6 scaffold_3                                                         |
|        | TC9745     | Leafy spurge | 1   | similar to UniRef100_A7PT37 Cluster: Chromosome chr8 scaffold_29                                                        |
|        | CK642921   | Cassava      | 1   | similar to UniRef100_A7Nzk3 Cluster: Chromosome chr6 scaffold_3                                                         |
|        | DV446894   | Cassava      | 1   | similar to UniRef100_A7PT37 Cluster: Chromosome chr8 scaffold_29                                                        |
|        | DV141695   | Leafy spurge | 1.5 | similar to UniRef100_Q2UBR6 Cluster: Predicted protein                                                                  |
|        | DB935104   | Cassava      | 1.5 | homologue to UniRef100_A7QLD5 Cluster: Chromosome chr11 scaffold_118                                                    |
|        | DV141695   | Leafy spurge | 2.5 | similar to UniRef100_Q2UBR6 Cluster: Predicted protein                                                                  |
|        | DB935104   | Cassava      | 2.5 | homologue to UniRef100_A7QLD5 Cluster: Chromosome chr11 scaffold_118                                                    |
|        | TC9971     | Cassava      | 3   | homologue to UniRef100_Q9LNK4 Cluster: F12K21.24                                                                        |
|        | TC1009     | Cassava      | 3   | homologue to UniRef100_P23472 Cluster: Hevamine-A precursor [Includes: Chitinase (EC 3.2.1.14); Lysozyme (EC 3.2.1.17)] |
|        | TC12051    | Cassava      | 3   | homologue to UniRef100_P23472 Cluster: Hevamine-A precursor [Includes: Chitinase (EC 3.2.1.14); Lysozyme (EC 3.2.1.17)] |
|        | TC4513     | Cassava      | 3   | similar to UniRef100_P23472 Cluster: Hevamine-A precursor [Includes: Chitinase (EC 3.2.1.14); Lysozyme (EC 3.2.1.17)]   |
| miR161 | DV142499   | Leafy spurge | 1   | weakly similar to UniRef100_A9TFE2 Cluster: Predicted protein                                                           |
|        | DV142499   | Leafy spurge | 1.5 | weakly similar to UniRef100_A9TFE2 Cluster: Predicted protein                                                           |
|        | DV132009   | Leafy spurge | 2.5 | similar to UniRef100_A7R7X5 Cluster: Chromosome undetermined scaffold_2089                                              |
|        | DV139749   | Leafy spurge | 2.5 | weakly similar to UniRef100_Q6L6Q0 Cluster: Hypotetical protein                                                         |

|        |          |              |     |                                                                                 |
|--------|----------|--------------|-----|---------------------------------------------------------------------------------|
|        | DV150077 | Leafy spurge | 2.5 | weakly similar to UniRef100_A7PJG0 Cluster: Chromosome chr12 scaffold_18        |
|        | DV157354 | Leafy spurge | 2.5 | similar to UniRef100_A7PBI2 Cluster: Chromosome chr16 scaffold_10               |
|        | TC84     | Leafy spurge | 2.5 | similar to UniRef100_A7PEN9 Cluster: Chromosome chr11 scaffold_13               |
|        | DV447454 | Cassava      | 2.5 | weakly similar to UniRef100_A7QVPI Cluster: Chromosome chr14 scaffold_190       |
|        | DV132289 | Leafy spurge | 3   | similar to UniRef100_A7P5C1 Cluster: Chromosome chr4 scaffold_6                 |
|        | DV157232 | Leafy spurge | 3   | similar to UniRef100_A7QMW3 Cluster: Chromosome chr14 scaffold_128              |
|        | DV157321 | Leafy spurge | 3   | similar to UniRef100_A7R0N0 Cluster: Chromosome chr10 scaffold_312              |
|        | DV157462 | Leafy spurge | 3   | weakly similar to UniRef100_A7QVN1 Cluster: Chromosome chr14 scaffold_190       |
|        | DV135165 | Leafy spurge | 3   | similar to UniRef100_Q4IZG9 Cluster: Sodium:alanine symporter                   |
|        | DV150077 | Leafy spurge | 3   | weakly similar to UniRef100_A7PJG0 Cluster: Chromosome chr12 scaffold_18        |
|        | DV155148 | Leafy spurge | 3   | similar to UniRef100_A7Q036 Cluster: Chromosome chr8 scaffold_41                |
|        | TC10608  | Leafy spurge | 3   | similar to UniRef100_A7PCB0 Cluster: Chromosome chr2 scaffold_11                |
|        | TC84     | Leafy spurge | 3   | similar to UniRef100_A7PEN9 Cluster: Chromosome chr11 scaffold_13               |
| miR162 | TC343    | Cassava      | 2.5 | similar to UniRef100_Q9FQE4 Cluster: Glutathione S-transferase GST 14           |
|        | TC1862   | Leafy spurge | 3   | weakly similar to UniRef100_A4PY46 Cluster: Ankyrin                             |
|        | TC3211   | Leafy spurge | 3   | similar to UniRef100_Q94BY1 Cluster: AT3g52150/F4F15_260                        |
|        | DB950015 | Cassava      | 3   |                                                                                 |
| miR163 | TC2317   | Leafy spurge | 2.5 | weakly similar to UniRef100_A7Q9P4 Cluster: Chromosome chr5 scaffold_67         |
|        | TC6987   | Leafy spurge | 2.5 | similar to UniRef100_A8IXM2 Cluster: Wound-responsive protein-related           |
|        | TC9523   | Leafy spurge | 2.5 | similar to UniRef100_Q9M4Q7 Cluster: Seed storage protein                       |
|        | TC2317   | Leafy spurge | 2.5 | weakly similar to UniRef100_A7Q9P4 Cluster: Chromosome chr5 scaffold_67         |
|        | TC9523   | Leafy spurge | 2.5 | similar to UniRef100_Q9M4Q7 Cluster: Seed storage protein                       |
|        | TC2317   | Leafy spurge | 2.5 | weakly similar to UniRef100_A7Q9P4 Cluster: Chromosome chr5 scaffold_67         |
|        | TC9523   | Leafy spurge | 2.5 | similar to UniRef100_Q9M4Q7 Cluster: Seed storage protein                       |
|        | TC18     | Cassava      | 2.5 | UniRef100_Q1AK43 Cluster: Plastid ATP/ADP transport protein 1                   |
|        | TC18     | Cassava      | 2.5 | UniRef100_Q1AK43 Cluster: Plastid ATP/ADP transport protein 1                   |
|        | TC18     | Cassava      | 2.5 | UniRef100_Q1AK43 Cluster: Plastid ATP/ADP transport protein 1                   |
|        | DV121931 | Leafy spurge | 3   | similar to UniRef100_A7PVD2 Cluster: Chromosome chr4 scaffold_32                |
|        | TC1387   | Leafy spurge | 3   | homologue to UniRef100_A7P8D5 Cluster: Chromosome chr3 scaffold_8               |
|        | TC1387   | Leafy spurge | 3   | homologue to UniRef100_A7P8D5 Cluster: Chromosome chr3 scaffold_8               |
|        | TC1387   | Leafy spurge | 3   | homologue to UniRef100_A7P8D5 Cluster: Chromosome chr3 scaffold_8               |
|        | CK901360 | Cassava      | 3   | UniRef100_UPI000069D909 Cluster: Zinc finger CCHC domain-containing protein 11. |
|        | TC1224   | Cassava      | 3   | homologue to UniRef100_O82147 Cluster: Spermidine synthase                      |
|        | TC2264   | Cassava      | 3   | homologue to UniRef100_A7PL29 Cluster: Chromosome chr7 scaffold_20              |
|        | TC8822   | Cassava      | 3   | homologue to UniRef100_Q8GTQ4 Cluster: Spermidine synthase                      |

|        |            |              |     |                                                                                   |
|--------|------------|--------------|-----|-----------------------------------------------------------------------------------|
|        | TC1224     | Cassava      | 3   | homologue to UniRef100_O82147 Cluster: Spermidine synthase                        |
|        | TC2264     | Cassava      | 3   | homologue to UniRef100_A7PL29 Cluster: Chromosome chr7 scaffold_20                |
|        | TC8822     | Cassava      | 3   | homologue to UniRef100_Q8GTQ4 Cluster: Spermidine synthase                        |
|        | TC1224     | Cassava      | 3   | homologue to UniRef100_O82147 Cluster: Spermidine synthase                        |
|        | TC2264     | Cassava      | 3   | homologue to UniRef100_A7PL29 Cluster: Chromosome chr7 scaffold_20                |
|        | TC8822     | Cassava      | 3   | homologue to UniRef100_Q8GTQ4 Cluster: Spermidine synthase                        |
| miR164 | DV152188   | Leafy spurge | 1   | homologue to UniRef100_Q136H5 Cluster: Allergen V5/Tpx-1 related precursor        |
|        | TC4171     | Leafy spurge | 2   | similar to UniRef100_A7PMY9 Cluster: Chromosome chr14 scaffold_21                 |
|        | FF536822   | Cassava      | 2.5 | similar to UniRef100_A7PMY9 Cluster: Chromosome chr14 scaffold_21                 |
|        | DV135880   | Leafy spurge | 3   | similar to UniRef100_A7QXF1 Cluster: Chromosome undetermined scaffold_222         |
|        | TC10081    | Leafy spurge | 3   | homologue to UniRef100_Q42962 Cluster: Phosphoglycerate kinase cytosolic          |
|        | TC616      | Leafy spurge | 3   | similar to UniRef100_A7QXF1 Cluster: Chromosome undetermined scaffold_222         |
|        | DB921781   | Cassava      | 3   | similar to UniRef100_A7QJE1 Cluster: Chromosome chr8 scaffold_106                 |
|        | TC11925    | Cassava      | 3   | homologue to UniRef100_Q9SN95 Cluster: DTDG-glucose 4-6-dehydratases-like protein |
|        | TC4194     | Cassava      | 3   | similar to UniRef100_A7QEQ5 Cluster: Chromosome chr16 scaffold_86                 |
| miR165 | TC4921     | Leafy spurge | 1.5 | similar to UniRef100_Q5D1M4 Cluster: Class III HD-Zip protein 3                   |
|        | EC605655.1 | rubber tree  | 2.5 | Y01G03 YLX600 Hevea brasiliensis cDNA clone Y01G03 5'                             |
|        | EC608335.1 | rubber tree  | 2.5 | Y29A08 YLX600 Hevea brasiliensis cDNA clone Y29A08 5'                             |
|        | DT883599   | Cassava      | 3   |                                                                                   |
| miR166 | TC4921     | Leafy spurge | 2   | similar to UniRef100_Q5D1M4 Cluster: Class III HD-Zip protein 3                   |
|        | TC4921     | Leafy spurge | 2   | similar to UniRef100_Q5D1M4 Cluster: Class III HD-Zip protein 3                   |
|        | EC605655.1 | rubber tree  | 3   | Y01G03 YLX600 Hevea brasiliensis cDNA clone Y01G03 5'                             |
|        | EC608335.1 | rubber tree  | 3   | Y29A08 YLX600 Hevea brasiliensis cDNA clone Y29A08 5'                             |
|        | EC605655.1 | rubber tree  | 3   | Y01G03 YLX600 Hevea brasiliensis cDNA clone Y01G03 5'                             |
|        | EC608335.1 | rubber tree  | 3   | Y29A08 YLX600 Hevea brasiliensis cDNA clone Y29A08 5'                             |
| miR167 | TC1387     | Leafy spurge | 2.5 | homologue to UniRef100_A7P8D5 Cluster: Chromosome chr3 scaffold_8                 |
|        | TC8303     | Leafy spurge | 2.5 | similar to UniRef100_A7PU44 Cluster: Chromosome chr7 scaffold_31                  |
|        | TC1387     | Leafy spurge | 2.5 | homologue to UniRef100_A7P8D5 Cluster: Chromosome chr3 scaffold_8                 |
|        | TC8303     | Leafy spurge | 2.5 | similar to UniRef100_A7PU44 Cluster: Chromosome chr7 scaffold_31                  |
|        | TC11817    | Cassava      | 2.5 | similar to UniRef100_O57150 Cluster: H88                                          |
|        | TC6957     | Cassava      | 2.5 | homologue to UniRef100_Q3L0K1 Cluster: Cysteine proteinase                        |
|        | TC11817    | Cassava      | 2.5 | similar to UniRef100_O57150 Cluster: H88                                          |
|        | TC6957     | Cassava      | 2.5 | homologue to UniRef100_Q3L0K1 Cluster: Cysteine proteinase                        |
|        | EC605986.1 | rubber tree  | 3   | Y53G08 YLX600 Hevea brasiliensis cDNA clone Y53G08 5'                             |
|        | EC605986.1 | rubber tree  | 3   | Y53G08 YLX600 Hevea brasiliensis cDNA clone Y53G08 5'                             |

|        |          |              |     |                                                                                           |
|--------|----------|--------------|-----|-------------------------------------------------------------------------------------------|
|        | DB920565 | Cassava      | 3   | weakly similar to UniRef100_A7PUR5 Cluster: Chromosome chr4 scaffold_32                   |
|        | TC2016   | Cassava      | 3   | similar to UniRef100_Q3L0K1 Cluster: Cysteine proteinase                                  |
|        | TC9480   | Cassava      | 3   | weakly similar to UniRef100_A7PUR5 Cluster: Chromosome chr4 scaffold_32                   |
|        | DB920565 | Cassava      | 3   | weakly similar to UniRef100_A7PUR5 Cluster: Chromosome chr4 scaffold_32                   |
|        | TC2016   | Cassava      | 3   | similar to UniRef100_Q3L0K1 Cluster: Cysteine proteinase                                  |
|        | TC9480   | Cassava      | 3   | weakly similar to UniRef100_A7PUR5 Cluster: Chromosome chr4 scaffold_32                   |
| miR168 | DV444850 | Cassava      | 2.5 | homologue to UniRef100_Q38IX0 Cluster: Glyceraldehyde-3-phosphate dehydrogenase B subunit |
|        | DV150068 | Leafy spurge | 3   | homologue to UniRef100_A2Q2S3 Cluster: Glycosyl transferase family 48                     |
|        | TC2280   | Cassava      | 3   | weakly similar to UniRef100_A811E4 Cluster: Hydroxyproline-rich cell wall protein         |
|        | TC6131   | Cassava      | 3   | similar to UniRef100_UPI0000383E14 Cluster: COG1538: Outer membrane protein               |
|        | TC9632   | Cassava      | 3   | weakly similar to UniRef100_O10341 Cluster: Uncharacterized 29.3 kDa protein              |
| miR169 | TC5337   | Cassava      | 1.5 |                                                                                           |
|        | TC5337   | Cassava      | 2   |                                                                                           |
|        | TC5771   | Cassava      | 2   | weakly similar to UniRef100_A4ZVU9 Cluster: CCAAT-binding transcription factor            |
|        | TC8897   | Cassava      | 2   | similar to UniRef100_Q9LNP6 Cluster: Nuclear transcription factor Y subunit A-8           |
|        | TC8897   | Cassava      | 2   | similar to UniRef100_Q9LNP6 Cluster: Nuclear transcription factor Y subunit A-8           |
|        | TC5337   | Cassava      | 2   |                                                                                           |
|        | DV147404 | Leafy spurge | 2.5 | homologue to UniRef100_Q2HWC2 Cluster: Ribosomal protein S28e                             |
|        | TC8268   | Leafy spurge | 2.5 | weakly similar to UniRef100_Q89R42 Cluster: Blr2930 protein                               |
|        | DV147404 | Leafy spurge | 2.5 | homologue to UniRef100_Q2HWC2 Cluster: Ribosomal protein S28e                             |
|        | CK652298 | Cassava      | 2.5 | similar to UniRef100_A3U445 Cluster: Transcription-repair coupling factor                 |
|        | TC4224   | Cassava      | 2.5 | weakly similar to UniRef100_Q42471 Cluster: CCAAT-binding factor B subunit homolog        |
|        | TC8897   | Cassava      | 2.5 | similar to UniRef100_Q9LNP6 Cluster: Nuclear transcription factor Y subunit A-8           |
|        | TC5771   | Cassava      | 2.5 | weakly similar to UniRef100_A4ZVU9 Cluster: CCAAT-binding transcription factor            |
|        | CK652298 | Cassava      | 2.5 | similar to UniRef100_A3U445 Cluster: Transcription-repair coupling factor                 |
|        | DV448363 | Cassava      | 2.5 | similar to UniRef100_A7P6L4 Cluster: Chromosome chr9 scaffold_7                           |
|        | TC4224   | Cassava      | 2.5 | weakly similar to UniRef100_Q42471 Cluster: CCAAT-binding factor B subunit homolog        |
|        | TC5337   | Cassava      | 2.5 |                                                                                           |
|        | TC6016   | Cassava      | 2.5 | similar to UniRef100_A7P6L4 Cluster: Chromosome chr9 scaffold_7                           |
|        | TC5771   | Cassava      | 2.5 | weakly similar to UniRef100_A4ZVU9 Cluster: CCAAT-binding transcription factor            |

|        |          |              |     |                                                                                     |
|--------|----------|--------------|-----|-------------------------------------------------------------------------------------|
|        | TC8268   | Leafy spurge | 3   | weakly similar to UniRef100_Q89R42 Cluster: Blr2930 protein                         |
|        | TC10712  | Leafy spurge | 3   | similar to UniRef100_A7Q5N8 Cluster: Chromosome undetermined scaffold_53            |
|        | TC8268   | Leafy spurge | 3   | weakly similar to UniRef100_Q89R42 Cluster: Blr2930 protein                         |
|        | TC10712  | Leafy spurge | 3   | similar to UniRef100_A7Q5N8 Cluster: Chromosome undetermined scaffold_53            |
|        | TC8268   | Leafy spurge | 3   | weakly similar to UniRef100_Q89R42 Cluster: Blr2930 protein                         |
|        | TC8897   | Cassava      | 3   | similar to UniRef100_Q9LNP6 Cluster: Nuclear transcription factor Y subunit A-8     |
|        | DV448363 | Cassava      | 3   | similar to UniRef100_A7P6L4 Cluster: Chromosome chr9 scaffold_7                     |
|        | TC6016   | Cassava      | 3   | similar to UniRef100_A7P6L4 Cluster: Chromosome chr9 scaffold_7                     |
|        | DV448363 | Cassava      | 3   | similar to UniRef100_A7P6L4 Cluster: Chromosome chr9 scaffold_7                     |
|        | TC6016   | Cassava      | 3   | similar to UniRef100_A7P6L4 Cluster: Chromosome chr9 scaffold_7                     |
|        | TC8897   | Cassava      | 3   | similar to UniRef100_Q9LNP6 Cluster: Nuclear transcription factor Y subunit A-8     |
|        | DV448363 | Cassava      | 3   | similar to UniRef100_A7P6L4 Cluster: Chromosome chr9 scaffold_7                     |
|        | TC6016   | Cassava      | 3   | similar to UniRef100_A7P6L4 Cluster: Chromosome chr9 scaffold_7                     |
|        | TC8897   | Cassava      | 3   | similar to UniRef100_Q9LNP6 Cluster: Nuclear transcription factor Y subunit A-8     |
| miR170 | DV125063 | Leafy spurge | 1   | similar to UniRef100_A7PYF4 Cluster: Chromosome chr15 scaffold_37                   |
|        | TC4794   | Leafy spurge | 2.5 |                                                                                     |
|        | DB945506 | Cassava      | 2.5 |                                                                                     |
| miR171 | DV125063 | Leafy spurge | 0.5 | similar to UniRef100_A7PYF4 Cluster: Chromosome chr15 scaffold_37                   |
|        | DV125063 | Leafy spurge | 1.5 | similar to UniRef100_A7PYF4 Cluster: Chromosome chr15 scaffold_37                   |
|        | DV125063 | Leafy spurge | 1.5 | similar to UniRef100_A7PYF4 Cluster: Chromosome chr15 scaffold_37                   |
|        | TC4794   | Leafy spurge | 1.5 |                                                                                     |
|        | DV125063 | Leafy spurge | 1.5 | similar to UniRef100_A7PYF4 Cluster: Chromosome chr15 scaffold_37                   |
|        | TC4794   | Leafy spurge | 1.5 |                                                                                     |
|        | TC4794   | Leafy spurge | 2   |                                                                                     |
|        | DV126070 | Leafy spurge | 2.5 |                                                                                     |
|        | TC4794   | Leafy spurge | 2.5 |                                                                                     |
|        | DV144969 | Leafy spurge | 3   | weakly similar to UniRef100_Q0D826 Cluster: Os07g0189400 protein                    |
|        | TC215    | Leafy spurge | 3   | homologue to UniRef100_A7P2J4 Cluster: Chromosome chr1 scaffold_5                   |
|        | TC9787   | Leafy spurge | 3   |                                                                                     |
|        | TC215    | Leafy spurge | 3   | homologue to UniRef100_A7P2J4 Cluster: Chromosome chr1 scaffold_5                   |
|        | TC2407   | Leafy spurge | 3   | similar to UniRef100_Q2Z1Y8 Cluster: 1-acyl-sn-glycerol-3-phosphate acyltransferase |
|        | TC8939   | Leafy spurge | 3   | similar to UniRef100_P93157 Cluster: Annexin                                        |
|        | TC1443   | Leafy spurge | 3   | similar to UniRef100_A7NUN6 Cluster: Chromosome chr18 scaffold_1                    |

|        |            |              |     |                                                                                                                                                                                                                                   |
|--------|------------|--------------|-----|-----------------------------------------------------------------------------------------------------------------------------------------------------------------------------------------------------------------------------------|
|        | TC7298     | Cassava      | 3   | similar to UniRef100_Q8W4K1 Cluster: tRNA wybutosine-synthesizing protein 2/3/4 (EC 2.1.1.-) [Includes: tRNA wybutosine-synthesizing protein 3 homolog (EC 2.1.1.-); tRNA wybutosine synthesizing protein 2 homolog (EC 2.1.1.-)] |
|        | TC9878     | Cassava      | 3   | similar to UniRef100_A7PUI5 Cluster: Chromosome chr7 scaffold_31                                                                                                                                                                  |
|        | TC7298     | Cassava      | 3   | similar to UniRef100_Q8W4K1 Cluster: tRNA wybutosine-synthesizing protein 2/3/4 (EC 2.1.1.-) [Includes: tRNA wybutosine-synthesizing protein 3 homolog (EC 2.1.1.-); tRNA wybutosine synthesizing protein 2 homolog (EC 2.1.1.-)] |
|        | TC9878     | Cassava      | 3   | similar to UniRef100_A7PUI5 Cluster: Chromosome chr7 scaffold_31                                                                                                                                                                  |
| miR172 | EC606382.1 | rubber tree  | 0.5 | Y43C06 YLX600 Hevea brasiliensis cDNA clone Y43C06 5'                                                                                                                                                                             |
|        | EC609886.1 | rubber tree  | 0.5 | Y21B11 YLX600 Hevea brasiliensis cDNA clone Y21B11 5'                                                                                                                                                                             |
|        | DV124861   | Leafy spurge | 0.5 | similar to UniRef100_Q84U24 Cluster: LIPLESS1                                                                                                                                                                                     |
|        | TC6058     | Leafy spurge | 0.5 | similar to UniRef100_Q9XHD3 Cluster: PHAP2B protein                                                                                                                                                                               |
|        | EC603373.1 | rubber tree  | 2.5 | Y18H03 YLX600 Hevea brasiliensis cDNA clone Y18H03 5'                                                                                                                                                                             |
|        | EC604580.1 | rubber tree  | 2.5 | Y12C06 YLX600 Hevea brasiliensis cDNA clone Y12C06 5'                                                                                                                                                                             |
|        | DB940936   | Cassava      | 2.5 | weakly similar to UniRef100_A7QKP6 Cluster: Chromosome chr2 scaffold_113                                                                                                                                                          |
|        | DV136368   | Leafy spurge | 3   | homologue to UniRef100_Q52ZF0 Cluster: Receptor tyrosine kinase-like protein                                                                                                                                                      |
|        | DV149786   | Leafy spurge | 3   | weakly similar to UniRef100_A7POS0 Cluster: Chromosome chr19 scaffold_4                                                                                                                                                           |
|        | DV155015   | Leafy spurge | 3   | similar to UniRef100_A7P3V3 Cluster: Chromosome chr1 scaffold_5                                                                                                                                                                   |
|        | TC7005     | Leafy spurge | 3   | similar to UniRef100_A7P3V3 Cluster: Chromosome chr1 scaffold_5                                                                                                                                                                   |
|        | TC7711     | Leafy spurge | 3   | similar to UniRef100_A7P3V3 Cluster: Chromosome chr1 scaffold_5                                                                                                                                                                   |
| miR390 | DV447689   | Cassava      | 1.5 | similar to UniRef100_Q9T6M0 Cluster: NADH-ubiquinone oxidoreductase chain 1                                                                                                                                                       |
|        | TC3854     | Cassava      | 2   | UniRef100_Q9JM89 Cluster: Synaptotagmin II                                                                                                                                                                                        |
|        | DV119644   | Leafy spurge | 2.5 |                                                                                                                                                                                                                                   |
|        | TC2955     | Cassava      | 2.5 | similar to UniRef100_A7PZM4 Cluster: Chromosome chr15 scaffold_40                                                                                                                                                                 |
|        | TC1741     | Leafy spurge | 3   | similar to UniRef100_A7NVJ2 Cluster: Chromosome chr18 scaffold_1                                                                                                                                                                  |
|        | TC4022     | Cassava      | 3   | similar to UniRef100_A7P779 Cluster: Chromosome chr9 scaffold_7                                                                                                                                                                   |
|        | DV451121   | Cassava      | 3   | similar to UniRef100_Q07469 Cluster: Bark storage protein A precursor                                                                                                                                                             |
| miR393 | TC7700     | Cassava      | 1   | similar to UniRef100_Q0Z845 Cluster: Auxin-responsive factor TIR1-like protein                                                                                                                                                    |
|        | TC7700     | Cassava      | 1   | similar to UniRef100_Q0Z845 Cluster: Auxin-responsive factor TIR1-like protein                                                                                                                                                    |
|        | TC7700     | Cassava      | 1   | similar to UniRef100_Q0Z845 Cluster: Auxin-responsive factor TIR1-like protein                                                                                                                                                    |
|        | TC6865     | Cassava      | 1   | similar to UniRef100_Q570C0 Cluster: Protein TRANSPORT INHIBITOR RESPONSE 1                                                                                                                                                       |
|        | TC6865     | Cassava      | 1   | similar to UniRef100_Q570C0 Cluster: Protein TRANSPORT INHIBITOR RESPONSE 1                                                                                                                                                       |
|        | TC6865     | Cassava      | 1   | similar to UniRef100_Q570C0 Cluster: Protein TRANSPORT INHIBITOR RESPONSE 1                                                                                                                                                       |

|          |              |     |                                                                                |
|----------|--------------|-----|--------------------------------------------------------------------------------|
| TC7700   | Cassava      | 1   | similar to UniRef100_Q0Z845 Cluster: Auxin-responsive factor TIR1-like protein |
| TC7700   | Cassava      | 1   | similar to UniRef100_Q0Z845 Cluster: Auxin-responsive factor TIR1-like protein |
| TC7700   | Cassava      | 1   | similar to UniRef100_Q0Z845 Cluster: Auxin-responsive factor TIR1-like protein |
| TC2259   | Leafy spurge | 1.5 | similar to UniRef100_Q0Z845 Cluster: Auxin-responsive factor TIR1-like protein |
| TC2259   | Leafy spurge | 1.5 | similar to UniRef100_Q0Z845 Cluster: Auxin-responsive factor TIR1-like protein |
| TC4243   | Cassava      | 1.5 | homologue to UniRef100_A4KA30 Cluster: Transport inhibitor response 1          |
| TC6865   | Cassava      | 1.5 | similar to UniRef100_Q570C0 Cluster: Protein TRANSPORT INHIBITOR RESPONSE 1    |
| TC8380   | Cassava      | 1.5 | similar to UniRef100_Q0Z845 Cluster: Auxin-responsive factor TIR1-like protein |
| TC4243   | Cassava      | 1.5 | homologue to UniRef100_A4KA30 Cluster: Transport inhibitor response 1          |
| TC6865   | Cassava      | 1.5 | similar to UniRef100_Q570C0 Cluster: Protein TRANSPORT INHIBITOR RESPONSE 1    |
| TC8380   | Cassava      | 1.5 | similar to UniRef100_Q0Z845 Cluster: Auxin-responsive factor TIR1-like protein |
| TC2259   | Leafy spurge | 2   | similar to UniRef100_Q0Z845 Cluster: Auxin-responsive factor TIR1-like protein |
| TC2259   | Leafy spurge | 2   | similar to UniRef100_Q0Z845 Cluster: Auxin-responsive factor TIR1-like protein |
| TC2259   | Leafy spurge | 2   | similar to UniRef100_Q0Z845 Cluster: Auxin-responsive factor TIR1-like protein |
| TC2259   | Leafy spurge | 2   | similar to UniRef100_Q0Z845 Cluster: Auxin-responsive factor TIR1-like protein |
| TC2259   | Leafy spurge | 2   | similar to UniRef100_Q0Z845 Cluster: Auxin-responsive factor TIR1-like protein |
| TC2259   | Leafy spurge | 2   | similar to UniRef100_Q0Z845 Cluster: Auxin-responsive factor TIR1-like protein |
| TC2259   | Leafy spurge | 2   | similar to UniRef100_Q0Z845 Cluster: Auxin-responsive factor TIR1-like protein |
| TC2259   | Leafy spurge | 2   | similar to UniRef100_Q0Z845 Cluster: Auxin-responsive factor TIR1-like protein |
| TC4243   | Cassava      | 2   | homologue to UniRef100_A4KA30 Cluster: Transport inhibitor response 1          |
| TC6865   | Cassava      | 2   | similar to UniRef100_Q570C0 Cluster: Protein TRANSPORT INHIBITOR RESPONSE 1    |
| TC8380   | Cassava      | 2   | similar to UniRef100_Q0Z845 Cluster: Auxin-responsive factor TIR1-like protein |
| DB954893 | Cassava      | 2   | similar to UniRef100_A7Q376 Cluster: Chromosome chr12 scaffold_47              |
| TC4243   | Cassava      | 2   | homologue to UniRef100_A4KA30 Cluster: Transport inhibitor response 1          |
| TC7700   | Cassava      | 2   | similar to UniRef100_Q0Z845 Cluster: Auxin-responsive factor TIR1-like protein |
| TC8380   | Cassava      | 2   | similar to UniRef100_Q0Z845 Cluster: Auxin-responsive factor TIR1-like protein |
| DB954893 | Cassava      | 2   | similar to UniRef100_A7Q376 Cluster: Chromosome chr12 scaffold_47              |
| TC4243   | Cassava      | 2   | homologue to UniRef100_A4KA30 Cluster: Transport inhibitor response 1          |
| TC7700   | Cassava      | 2   | similar to UniRef100_Q0Z845 Cluster: Auxin-responsive factor TIR1-like protein |
| TC8380   | Cassava      | 2   | similar to UniRef100_Q0Z845 Cluster: Auxin-responsive factor TIR1-like protein |
| DB954893 | Cassava      | 2   | similar to UniRef100_A7Q376 Cluster: Chromosome chr12 scaffold_47              |
| TC4243   | Cassava      | 2   | homologue to UniRef100_A4KA30 Cluster: Transport inhibitor response 1          |
| TC7700   | Cassava      | 2   | similar to UniRef100_Q0Z845 Cluster: Auxin-responsive factor TIR1-like protein |
| TC8380   | Cassava      | 2   | similar to UniRef100_Q0Z845 Cluster: Auxin-responsive factor TIR1-like protein |

|          |              |     |                                                                                       |
|----------|--------------|-----|---------------------------------------------------------------------------------------|
| TC4243   | Cassava      | 2   | homologue to UniRef100_A4KA30 Cluster: Transport inhibitor response 1                 |
| TC6865   | Cassava      | 2   | similar to UniRef100_Q570C0 Cluster: Protein TRANSPORT INHIBITOR RESPONSE 1           |
| TC8380   | Cassava      | 2   | similar to UniRef100_Q0Z845 Cluster: Auxin-responsive factor TIR1-like protein        |
| TC4243   | Cassava      | 2   | homologue to UniRef100_A4KA30 Cluster: Transport inhibitor response 1                 |
| TC6865   | Cassava      | 2   | similar to UniRef100_Q570C0 Cluster: Protein TRANSPORT INHIBITOR RESPONSE 1           |
| TC8380   | Cassava      | 2   | similar to UniRef100_Q0Z845 Cluster: Auxin-responsive factor TIR1-like protein        |
| TC4243   | Cassava      | 2   | homologue to UniRef100_A4KA30 Cluster: Transport inhibitor response 1                 |
| TC6865   | Cassava      | 2   | similar to UniRef100_Q570C0 Cluster: Protein TRANSPORT INHIBITOR RESPONSE 1           |
| TC8380   | Cassava      | 2   | similar to UniRef100_Q0Z845 Cluster: Auxin-responsive factor TIR1-like protein        |
| TC5985   | Leafy spurge | 2.5 | weakly similar to UniRef100_O81974 Cluster: Cytochrome P450 71D8                      |
| TC5985   | Leafy spurge | 2.5 | weakly similar to UniRef100_O81974 Cluster: Cytochrome P450 71D8                      |
| TC5985   | Leafy spurge | 2.5 | weakly similar to UniRef100_O81974 Cluster: Cytochrome P450 71D8                      |
| TC5985   | Leafy spurge | 2.5 | weakly similar to UniRef100_O81974 Cluster: Cytochrome P450 71D8                      |
| TC5985   | Leafy spurge | 2.5 | weakly similar to UniRef100_O81974 Cluster: Cytochrome P450 71D8                      |
| TC5985   | Leafy spurge | 2.5 | weakly similar to UniRef100_O81974 Cluster: Cytochrome P450 71D8                      |
| TC10008  | Leafy spurge | 3   | similar to UniRef100_Q4FH87 Cluster: Dehydration responsive element-binding protein 3 |
| TC10008  | Leafy spurge | 3   | similar to UniRef100_Q4FH87 Cluster: Dehydration responsive element-binding protein 3 |
| TC10008  | Leafy spurge | 3   | similar to UniRef100_Q4FH87 Cluster: Dehydration responsive element-binding protein 3 |
| DB921073 | Cassava      | 3   | similar to UniRef100_A7PYL1 Cluster: Chromosome chr12 scaffold_38                     |
| DB954893 | Cassava      | 3   | similar to UniRef100_A7Q376 Cluster: Chromosome chr12 scaffold_47                     |
| DB921073 | Cassava      | 3   | similar to UniRef100_A7PYL1 Cluster: Chromosome chr12 scaffold_38                     |
| DB954893 | Cassava      | 3   | similar to UniRef100_A7Q376 Cluster: Chromosome chr12 scaffold_47                     |
| DB921073 | Cassava      | 3   | similar to UniRef100_A7PYL1 Cluster: Chromosome chr12 scaffold_38                     |
| DB954893 | Cassava      | 3   | similar to UniRef100_A7Q376 Cluster: Chromosome chr12 scaffold_47                     |
| DB921073 | Cassava      | 3   | similar to UniRef100_A7PYL1 Cluster: Chromosome chr12 scaffold_38                     |
| DB921073 | Cassava      | 3   | similar to UniRef100_A7PYL1 Cluster: Chromosome chr12 scaffold_38                     |
| DB921073 | Cassava      | 3   | similar to UniRef100_A7PYL1 Cluster: Chromosome chr12 scaffold_38                     |
| DB921073 | Cassava      | 3   | similar to UniRef100_A7PYL1 Cluster: Chromosome chr12 scaffold_38                     |
| DB921073 | Cassava      | 3   | similar to UniRef100_A7PYL1 Cluster: Chromosome chr12 scaffold_38                     |
| DB954893 | Cassava      | 3   | similar to UniRef100_A7Q376 Cluster: Chromosome chr12 scaffold_47                     |
| DB921073 | Cassava      | 3   | similar to UniRef100_A7PYL1 Cluster: Chromosome chr12 scaffold_38                     |

|        |          |              |     |                                                                           |
|--------|----------|--------------|-----|---------------------------------------------------------------------------|
|        | DB954893 | Cassava      | 3   | similar to UniRef100_A7Q376 Cluster: Chromosome chr12 scaffold_47         |
|        | DB921073 | Cassava      | 3   | similar to UniRef100_A7PYL1 Cluster: Chromosome chr12 scaffold_38         |
|        | DB954893 | Cassava      | 3   | similar to UniRef100_A7Q376 Cluster: Chromosome chr12 scaffold_47         |
| miR394 | CK652213 | Cassava      | 3   | UniRef100_Q5VQV7 Cluster: Epstein-Barr virus EBNA-1-like protein          |
|        | DR084248 | Cassava      | 3   |                                                                           |
|        | TC10267  | Cassava      | 3   |                                                                           |
| miR395 | TC8518   | Leafy spurge | 1.5 | similar to UniRef100_Q43183 Cluster: Sulfate adenylyltransferase          |
|        | DV152764 | Leafy spurge | 3   | similar to UniRef100_A7NVI7 Cluster: Chromosome chr18 scaffold_1          |
|        | DV153579 | Leafy spurge | 3   | similar to UniRef100_A7NVI7 Cluster: Chromosome chr18 scaffold_1          |
|        | DB934525 | Cassava      | 3   | similar to UniRef100_Q43183 Cluster: Sulfate adenylyltransferase          |
|        | TC4356   | Cassava      | 3   | similar to UniRef100_Q1W2K0 Cluster: ATP-sulfurylase                      |
| miR396 | DV132448 | Leafy spurge | 2   | similar to UniRef100_A7P6J6 Cluster: Chromosome chr9 scaffold_7           |
|        | DV138614 | Leafy spurge | 2   | similar to UniRef100_A7P6J6 Cluster: Chromosome chr9 scaffold_7           |
|        | DV140575 | Leafy spurge | 2   | homologue to UniRef100_A7PPI1 Cluster: Chromosome chr8 scaffold_23        |
|        | DV145598 | Leafy spurge | 2   | similar to UniRef100_A7R1I7 Cluster: Chromosome undetermined scaffold_358 |
|        | DV148265 | Leafy spurge | 2   | similar to UniRef100_A7PB60 Cluster: Chromosome chr16 scaffold_10         |
|        | TC1506   | Leafy spurge | 2   | similar to UniRef100_A7PDY5 Cluster: Chromosome chr11 scaffold_13         |
|        | TC2685   | Leafy spurge | 2   | similar to UniRef100_A7NUC4 Cluster: Chromosome chr18 scaffold_1          |
|        | DV132448 | Leafy spurge | 2   | similar to UniRef100_A7P6J6 Cluster: Chromosome chr9 scaffold_7           |
|        | DV138614 | Leafy spurge | 2   | similar to UniRef100_A7P6J6 Cluster: Chromosome chr9 scaffold_7           |
|        | DV140575 | Leafy spurge | 2   | homologue to UniRef100_A7PPI1 Cluster: Chromosome chr8 scaffold_23        |
|        | DV145598 | Leafy spurge | 2   | similar to UniRef100_A7R1I7 Cluster: Chromosome undetermined scaffold_358 |
|        | DV148265 | Leafy spurge | 2   | similar to UniRef100_A7PB60 Cluster: Chromosome chr16 scaffold_10         |
|        | TC1506   | Leafy spurge | 2   | similar to UniRef100_A7PDY5 Cluster: Chromosome chr11 scaffold_13         |
|        | TC2685   | Leafy spurge | 2   | similar to UniRef100_A7NUC4 Cluster: Chromosome chr18 scaffold_1          |
|        | TC9516   | Leafy spurge | 2.5 | weakly similar to UniRef100_A7P9F7 Cluster: Chromosome chr3 scaffold_8    |
|        | TC9516   | Leafy spurge | 2.5 | weakly similar to UniRef100_A7P9F7 Cluster: Chromosome chr3 scaffold_8    |
|        | TC3860   | Cassava      | 2.5 | homologue to UniRef100_A9SS45 Cluster: Predicted protein                  |
|        | TC3860   | Cassava      | 2.5 | homologue to UniRef100_A9SS45 Cluster: Predicted protein                  |
|        | DV119854 | Leafy spurge | 3   | similar to UniRef100_A7QIV7 Cluster: Glutathione peroxidase               |
|        | DV136049 | Leafy spurge | 3   | similar to UniRef100_A3FNZ8 Cluster: Glutathione peroxidase 5             |
|        | DV141339 | Leafy spurge | 3   | similar to UniRef100_Q66Q67 Cluster: Homeodomain protein HOX3             |
|        | TC7439   | Leafy spurge | 3   | similar to UniRef100_A7P313 Cluster: Chromosome chr1 scaffold_5           |
|        | TC813    | Leafy spurge | 3   | similar to UniRef100_A5HIJ2 Cluster: Cysteine protease Cp2                |
|        | DV119854 | Leafy spurge | 3   | similar to UniRef100_A7QIV7 Cluster: Glutathione peroxidase               |

|        |          |              |     |                                                                                                    |
|--------|----------|--------------|-----|----------------------------------------------------------------------------------------------------|
|        | DV136049 | Leafy spurge | 3   | similar to UniRef100_A3FNZ8 Cluster: Glutathione peroxidase 5                                      |
|        | DV141339 | Leafy spurge | 3   | similar to UniRef100_Q66Q67 Cluster: Homeodomain protein HOX3                                      |
|        | TC7439   | Leafy spurge | 3   | similar to UniRef100_A7P313 Cluster: Chromosome chr1 scaffold_5                                    |
|        | CK649494 | Cassava      | 3   | homologue to UniRef100_P35493 Cluster: 2 3-bisphosphoglycerate-independent phosphoglycerate mutase |
|        | TC1826   | Cassava      | 3   | similar to UniRef100_P93799 Cluster: Dihydroflavonol 4-reductase                                   |
|        | TC6612   | Cassava      | 3   | similar to UniRef100_A7NT97 Cluster: Chromosome chr18 scaffold_1                                   |
|        | TC8429   | Cassava      | 3   | similar to UniRef100_Q8L8S1 Cluster: Heat shock protein 18                                         |
|        | CK649494 | Cassava      | 3   | homologue to UniRef100_P35493 Cluster: 2 3-bisphosphoglycerate-independent phosphoglycerate mutase |
|        | TC1826   | Cassava      | 3   | similar to UniRef100_P93799 Cluster: Dihydroflavonol 4-reductase                                   |
|        | TC5302   | Cassava      | 3   | similar to UniRef100_P14280 Cluster: Pectinesterase-1 precursor                                    |
|        | TC6612   | Cassava      | 3   | similar to UniRef100_A7NT97 Cluster: Chromosome chr18 scaffold_1                                   |
|        | TC8429   | Cassava      | 3   | similar to UniRef100_Q8L8S1 Cluster: Heat shock protein 18                                         |
| miR397 | TC3372   | Leafy spurge | 1   | similar to UniRef100_A7PP14 Cluster: Chromosome chr8 scaffold_23                                   |
|        | TC3372   | Leafy spurge | 1   | similar to UniRef100_A7PP14 Cluster: Chromosome chr8 scaffold_23                                   |
|        | TC3372   | Leafy spurge | 1   | similar to UniRef100_A7PP14 Cluster: Chromosome chr8 scaffold_23                                   |
|        | TC1557   | Leafy spurge | 1.5 | similar to UniRef100_A7PNP6 Cluster: Chromosome chr8 scaffold_23                                   |
|        | TC1557   | Leafy spurge | 1.5 | similar to UniRef100_A7PNP6 Cluster: Chromosome chr8 scaffold_23                                   |
|        | TC1557   | Leafy spurge | 1.5 | similar to UniRef100_A7PNP6 Cluster: Chromosome chr8 scaffold_23                                   |
|        | DV152039 | Leafy spurge | 2   | similar to UniRef100_A7PUT2 Cluster: Chromosome chr4 scaffold_32                                   |
|        | DV152039 | Leafy spurge | 2   | similar to UniRef100_A7PUT2 Cluster: Chromosome chr4 scaffold_32                                   |
|        | DV152039 | Leafy spurge | 2   | similar to UniRef100_A7PUT2 Cluster: Chromosome chr4 scaffold_32                                   |
|        | DR087678 | Cassava      | 2   | similar to UniRef100_Q8L4Y3 Cluster: Diphenol oxidase laccase                                      |
|        | FF379852 | Cassava      | 2   | similar to UniRef100_A7PNX8 Cluster: Chromosome chr8 scaffold_23                                   |
|        | DR087678 | Cassava      | 2   | similar to UniRef100_Q8L4Y3 Cluster: Diphenol oxidase laccase                                      |
|        | FF379852 | Cassava      | 2   | similar to UniRef100_A7PNX8 Cluster: Chromosome chr8 scaffold_23                                   |
|        | DR087678 | Cassava      | 2   | similar to UniRef100_Q8L4Y3 Cluster: Diphenol oxidase laccase                                      |
|        | FF379852 | Cassava      | 2   | similar to UniRef100_A7PNX8 Cluster: Chromosome chr8 scaffold_23                                   |
|        | DB922388 | Cassava      | 3   |                                                                                                    |
|        | DB941259 | Cassava      | 3   | similar to UniRef100_A7PAA6 Cluster: Chromosome chr14 scaffold_9                                   |
|        | DB922388 | Cassava      | 3   |                                                                                                    |
|        | DB941259 | Cassava      | 3   | similar to UniRef100_A7PAA6 Cluster: Chromosome chr14 scaffold_9                                   |
|        | DB922388 | Cassava      | 3   |                                                                                                    |
|        | DB941259 | Cassava      | 3   | similar to UniRef100_A7PAA6 Cluster: Chromosome chr14 scaffold_9                                   |
| miR398 | TC2977   | Cassava      | 2   | similar to UniRef100_A7Q737 Cluster: Chromosome chr5 scaffold_58                                   |

|        |          |              |     |                                                                                                    |
|--------|----------|--------------|-----|----------------------------------------------------------------------------------------------------|
|        | TC4900   | Cassava      | 2   | weakly similar to UniRef100_A7PF67 Cluster: Chromosome chr11 scaffold_13                           |
|        | TC2977   | Cassava      | 2   | similar to UniRef100_A7Q737 Cluster: Chromosome chr5 scaffold_58                                   |
|        | TC4900   | Cassava      | 2   | weakly similar to UniRef100_A7PF67 Cluster: Chromosome chr11 scaffold_13                           |
|        | TC2977   | Cassava      | 2.5 | similar to UniRef100_A7Q737 Cluster: Chromosome chr5 scaffold_58                                   |
|        | TC4900   | Cassava      | 2.5 | weakly similar to UniRef100_A7PF67 Cluster: Chromosome chr11 scaffold_13                           |
|        | TC2977   | Cassava      | 2.5 | similar to UniRef100_A7Q737 Cluster: Chromosome chr5 scaffold_58                                   |
|        | TC4900   | Cassava      | 2.5 | weakly similar to UniRef100_A7PF67 Cluster: Chromosome chr11 scaffold_13                           |
|        | DV153906 | Leafy spurge | 3   | similar to UniRef100_A6QTN9 Cluster: Predicted protein                                             |
|        | DV153906 | Leafy spurge | 3   | similar to UniRef100_A6QTN9 Cluster: Predicted protein                                             |
|        | TC2096   | Leafy spurge | 3   | similar to UniRef100_Q70CE4 Cluster: Superoxide dismutase                                          |
|        | DV153906 | Leafy spurge | 3   | similar to UniRef100_A6QTN9 Cluster: Predicted protein                                             |
|        | TC2096   | Leafy spurge | 3   | similar to UniRef100_Q70CE4 Cluster: Superoxide dismutase                                          |
|        | DV153906 | Leafy spurge | 3   | similar to UniRef100_A6QTN9 Cluster: Predicted protein                                             |
|        | TC10347  | Cassava      | 3   | UniRef100_Q58ZE5 Cluster: Superoxide dismutase [Cu-Zn]                                             |
|        | TC1068   | Cassava      | 3   | UniRef100_Q58ZE5 Cluster: Superoxide dismutase [Cu-Zn]                                             |
|        | TC11998  | Cassava      | 3   | similar to UniRef100_A4LA97 Cluster: Chloroplast small heat shock protein                          |
|        | TC10347  | Cassava      | 3   | UniRef100_Q58ZE5 Cluster: Superoxide dismutase [Cu-Zn]                                             |
|        | TC1068   | Cassava      | 3   | UniRef100_Q58ZE5 Cluster: Superoxide dismutase [Cu-Zn]                                             |
|        | TC11998  | Cassava      | 3   | similar to UniRef100_A4LA97 Cluster: Chloroplast small heat shock protein                          |
| miR399 | DV123258 | Leafy spurge | 1.5 | similar to UniRef100_A9IZE7 Cluster: Integral membrane sensor signal transduction histidine kinase |
|        | DB945966 | Cassava      | 1.5 | similar to UniRef100_Q19EB3 Cluster: Disease resistance protein                                    |
|        | TC4916   | Cassava      | 2   |                                                                                                    |
|        | DB945966 | Cassava      | 2   | similar to UniRef100_Q19EB3 Cluster: Disease resistance protein                                    |
|        | TC9501   | Leafy spurge | 2.5 |                                                                                                    |
|        | CK643326 | Cassava      | 2.5 | similar to UniRef100_Q1T6Z6 Cluster: Phosphate transporter                                         |
|        | TC4916   | Cassava      | 2.5 |                                                                                                    |
|        | DB935921 | Cassava      | 2.5 | similar to UniRef100_A7NX50 Cluster: Chromosome chr5 scaffold_2                                    |
|        | DB945966 | Cassava      | 2.5 | similar to UniRef100_Q19EB3 Cluster: Disease resistance protein                                    |
|        | CK643326 | Cassava      | 2.5 | similar to UniRef100_Q1T6Z6 Cluster: Phosphate transporter                                         |
|        | CK643326 | Cassava      | 2.5 | similar to UniRef100_Q1T6Z6 Cluster: Phosphate transporter                                         |
|        | TC4916   | Cassava      | 2.5 |                                                                                                    |
|        | TC9501   | Leafy spurge | 3   |                                                                                                    |
|        | DV123258 | Leafy spurge | 3   | similar to UniRef100_A9IZE7 Cluster: Integral membrane sensor signal transduction histidine kinase |
|        | TC9501   | Leafy spurge | 3   |                                                                                                    |

|        |            |              |     |                                                                                                    |
|--------|------------|--------------|-----|----------------------------------------------------------------------------------------------------|
|        | TC6933     | Leafy spurge | 3   | similar to UniRef100_A7PLZ3 Cluster: Chromosome chr14 scaffold_21                                  |
|        | DV123258   | Leafy spurge | 3   | similar to UniRef100_A9IZE7 Cluster: Integral membrane sensor signal transduction histidine kinase |
|        | DV123258   | Leafy spurge | 3   | similar to UniRef100_A9IZE7 Cluster: Integral membrane sensor signal transduction histidine kinase |
|        | DV123258   | Leafy spurge | 3   | similar to UniRef100_A9IZE7 Cluster: Integral membrane sensor signal transduction histidine kinase |
|        | FG806840   | Cassava      | 3   |                                                                                                    |
|        | TC4617     | Cassava      | 3   | similar to UniRef100_A7R0F3 Cluster: Chromosome undetermined scaffold_306                          |
|        | CK643326   | Cassava      | 3   | similar to UniRef100_Q1T6Z6 Cluster: Phosphate transporter                                         |
|        | DV447156   | Cassava      | 3   | similar to UniRef100_A7PRQ4 Cluster: Chromosome chr14 scaffold_27                                  |
|        | TC4916     | Cassava      | 3   |                                                                                                    |
|        | DB945966   | Cassava      | 3   | similar to UniRef100_Q19EB3 Cluster: Disease resistance protein                                    |
|        | DB945966   | Cassava      | 3   | similar to UniRef100_Q19EB3 Cluster: Disease resistance protein                                    |
| miR403 | CB376399.1 | rubber tree  | 0.5 | Hb13F08 Latex Lambda TripleX cDNA Library Hevea brasiliensis cDNA clone Hb13F08 5'                 |
|        | CB376399.1 | rubber tree  | 0.5 | Hb13F08 Latex Lambda TripleX cDNA Library Hevea brasiliensis cDNA clone Hb13F08 5'                 |
|        | CB376410.1 | rubber tree  | 0.5 | Hb13H07 Latex Lambda TripleX cDNA Library Hevea brasiliensis cDNA clone Hb13H07 5'                 |
|        | CB376410.1 | rubber tree  | 0.5 | Hb13H07 Latex Lambda TripleX cDNA Library Hevea brasiliensis cDNA clone Hb13H07 5'                 |
|        | CB376619.1 | rubber tree  | 0.5 | Hb10G02 Latex Lambda TripleX cDNA Library Hevea brasiliensis cDNA clone Hb10G02 5'                 |
|        | CB376619.1 | rubber tree  | 0.5 | Hb10G02 Latex Lambda TripleX cDNA Library Hevea brasiliensis cDNA clone Hb10G02 5'                 |
|        | CB376622.1 | rubber tree  | 0.5 | Hb10G07 Latex Lambda TripleX cDNA Library Hevea brasiliensis cDNA clone Hb10G07 5'                 |
|        | CB376622.1 | rubber tree  | 0.5 | Hb10G07 Latex Lambda TripleX cDNA Library Hevea brasiliensis cDNA clone Hb10G07 5'                 |
|        | CB376844.1 | rubber tree  | 0.5 | Hb05F12 Latex Lambda TripleX cDNA Library Hevea brasiliensis cDNA clone Hb05F12 5'                 |
|        | CB376844.1 | rubber tree  | 0.5 | Hb05F12 Latex Lambda TripleX cDNA Library Hevea brasiliensis cDNA clone Hb05F12 5'                 |
|        | CB376861.1 | rubber tree  | 0.5 | Hb05H06 Latex Lambda TripleX cDNA Library Hevea brasiliensis cDNA clone Hb05H06 5'                 |

|            |             |     |                                                                                    |
|------------|-------------|-----|------------------------------------------------------------------------------------|
| CB376861.1 | rubber tree | 0.5 | Hb05H06 Latex Lambda Triplex cDNA Library Hevea brasiliensis cDNA clone Hb05H06 5' |
| EC601823.1 | rubber tree | 0.5 | Y66B10 YLX600 Hevea brasiliensis cDNA clone Y66B10 5'                              |
| EC601823.1 | rubber tree | 0.5 | Y66B10 YLX600 Hevea brasiliensis cDNA clone Y66B10 5'                              |
| EC602202.1 | rubber tree | 0.5 | Y62D05 YLX600 Hevea brasiliensis cDNA clone Y62D05 5'                              |
| EC602202.1 | rubber tree | 0.5 | Y62D05 YLX600 Hevea brasiliensis cDNA clone Y62D05 5'                              |
| EC603031.1 | rubber tree | 0.5 | Y48C06 YLX600 Hevea brasiliensis cDNA clone Y48C06 5'                              |
| EC603226.1 | rubber tree | 0.5 | Y05E03 YLX600 Hevea brasiliensis cDNA clone Y05E03 5'                              |
| EC603226.1 | rubber tree | 0.5 | Y05E03 YLX600 Hevea brasiliensis cDNA clone Y05E03 5'                              |
| EC603518.1 | rubber tree | 0.5 | Y59H08 YLX600 Hevea brasiliensis cDNA clone Y59H08 5'                              |
| EC603518.1 | rubber tree | 0.5 | Y59H08 YLX600 Hevea brasiliensis cDNA clone Y59H08 5'                              |
| EC603796.1 | rubber tree | 0.5 | Y53F12 YLX600 Hevea brasiliensis cDNA clone Y53F12 5'                              |
| EC603796.1 | rubber tree | 0.5 | Y53F12 YLX600 Hevea brasiliensis cDNA clone Y53F12 5'                              |
| EC604209.1 | rubber tree | 0.5 | LatexY12A11 YLX600 Hevea brasiliensis cDNA clone LatexY12A11 5'                    |
| EC604209.1 | rubber tree | 0.5 | LatexY12A11 YLX600 Hevea brasiliensis cDNA clone LatexY12A11 5'                    |
| EC604318.1 | rubber tree | 0.5 | Y03B06 YLX600 Hevea brasiliensis cDNA clone Y03B06 5'                              |
| EC604318.1 | rubber tree | 0.5 | Y03B06 YLX600 Hevea brasiliensis cDNA clone Y03B06 5'                              |
| EC604849.1 | rubber tree | 0.5 | Y53A03 YLX600 Hevea brasiliensis cDNA clone Y53A03 5'                              |
| EC604963.1 | rubber tree | 0.5 | Y43A03 YLX600 Hevea brasiliensis cDNA clone Y43A03 5'                              |
| EC604963.1 | rubber tree | 0.5 | Y43A03 YLX600 Hevea brasiliensis cDNA clone Y43A03 5'                              |
| EC605091.1 | rubber tree | 0.5 | Y58E06 YLX600 Hevea brasiliensis cDNA clone Y58E06 5'                              |
| EC605091.1 | rubber tree | 0.5 | Y58E06 YLX600 Hevea brasiliensis cDNA clone Y58E06 5'                              |
| EC605157.1 | rubber tree | 0.5 | Y12A03 YLX600 Hevea brasiliensis cDNA clone Y12A03 5'                              |
| EC605157.1 | rubber tree | 0.5 | Y12A03 YLX600 Hevea brasiliensis cDNA clone Y12A03 5'                              |
| EC605819.1 | rubber tree | 0.5 | Y46F01 YLX600 Hevea brasiliensis cDNA clone Y46F01 5'                              |
| EC605819.1 | rubber tree | 0.5 | Y46F01 YLX600 Hevea brasiliensis cDNA clone Y46F01 5'                              |
| EC606735.1 | rubber tree | 0.5 | Y13B08 YLX600 Hevea brasiliensis cDNA clone Y13B08 5'                              |
| EC606735.1 | rubber tree | 0.5 | Y13B08 YLX600 Hevea brasiliensis cDNA clone Y13B08 5'                              |
| EC607511.1 | rubber tree | 0.5 | Y59D01 YLX600 Hevea brasiliensis cDNA clone Y59D01 5'                              |
| EC607511.1 | rubber tree | 0.5 | Y59D01 YLX600 Hevea brasiliensis cDNA clone Y59D01 5'                              |
| EC607569.1 | rubber tree | 0.5 | Y27F08 YLX600 Hevea brasiliensis cDNA clone Y27F08 5'                              |
| EC607569.1 | rubber tree | 0.5 | Y27F08 YLX600 Hevea brasiliensis cDNA clone Y27F08 5'                              |
| EC607678.1 | rubber tree | 0.5 | Y07C06 YLX600 Hevea brasiliensis cDNA clone Y07C06 5'                              |
| EC608339.1 | rubber tree | 0.5 | LatexY06D06 YLX600 Hevea brasiliensis cDNA clone LatexY06D06 5'                    |
| EC608339.1 | rubber tree | 0.5 | LatexY06D06 YLX600 Hevea brasiliensis cDNA clone LatexY06D06 5'                    |
| EC609694.1 | rubber tree | 0.5 | Y10F07 YLX600 Hevea brasiliensis cDNA clone Y10F07 5'                              |

|        |            |              |     |                                                                                         |
|--------|------------|--------------|-----|-----------------------------------------------------------------------------------------|
|        | EC609694.1 | rubber tree  | 0.5 | Y10F07 YLX600 Hevea brasiliensis cDNA clone Y10F07 5'                                   |
|        | EC603031.1 | rubber tree  | 1.5 | Y48C06 YLX600 Hevea brasiliensis cDNA clone Y48C06 5'                                   |
|        | EC604849.1 | rubber tree  | 1.5 | Y53A03 YLX600 Hevea brasiliensis cDNA clone Y53A03 5'                                   |
|        | EC607678.1 | rubber tree  | 1.5 | Y07C06 YLX600 Hevea brasiliensis cDNA clone Y07C06 5'                                   |
|        | TC4861     | Cassava      | 2   | weakly similar to UniRef100_A7QQW4 Cluster: Chromosome undetermined scaffold_145        |
|        | DV154402   | Leafy spurge | 2.5 | weakly similar to UniRef100_A7P1G0 Cluster: Chromosome chr19 scaffold_4                 |
|        | DV138632   | Leafy spurge | 3   | similar to UniRef100_A7PRN7 Cluster: Chromosome chr14 scaffold_27                       |
|        | TC6138     | Leafy spurge | 3   | similar to UniRef100_A7P045 Cluster: Chromosome chr6 scaffold_3                         |
| miR408 | DV134346   | Leafy spurge | 2   | homologue to UniRef100_A7P5C5 Cluster: Chromosome chr4 scaffold_6                       |
|        | TC5757     | Cassava      | 2   | similar to UniRef100_A7NSM5 Cluster: Chromosome chr18 scaffold_1                        |
|        | TC5757     | Cassava      | 2   | similar to UniRef100_A7NSM5 Cluster: Chromosome chr18 scaffold_1                        |
|        | TC1638     | Leafy spurge | 3   |                                                                                         |
|        | DV134346   | Leafy spurge | 3   | homologue to UniRef100_A7P5C5 Cluster: Chromosome chr4 scaffold_6                       |
|        | TC1638     | Leafy spurge | 3   |                                                                                         |
|        | FF380140   | Cassava      | 3   | weakly similar to UniRef100_A7PYU3 Cluster: Chromosome chr12 scaffold_38                |
|        | TC2004     | Cassava      | 3   | similar to UniRef100_A7PYU4 Cluster: Chromosome chr12 scaffold_38                       |
|        | FF380140   | Cassava      | 3   | weakly similar to UniRef100_A7PYU3 Cluster: Chromosome chr12 scaffold_38                |
|        | TC2004     | Cassava      | 3   | similar to UniRef100_A7PYU4 Cluster: Chromosome chr12 scaffold_38                       |
| miR447 | TC8129     | Leafy spurge | 2.5 | weakly similar to UniRef100_A3YS43 Cluster: Glycosyl transferase group 2 family protein |
|        | CK647763   | Cassava      | 2.5 | similar to UniRef100_A6MZS5 Cluster: Mta/sah nucleosidase                               |
|        | TC5149     | Cassava      | 2.5 | similar to UniRef100_Q94BX3 Cluster: AT4g25670/L73G19_50                                |
|        | EC600927.1 | rubber tree  | 3   | Y09H10 YLX600 Hevea brasiliensis cDNA clone Y09H10 5'                                   |
|        | EC604845.1 | rubber tree  | 3   | W133 YLX600 Hevea brasiliensis cDNA clone W133 5'                                       |
|        | EC606089.1 | rubber tree  | 3   | A552 YLX600 Hevea brasiliensis cDNA clone A552 5'                                       |
|        | DV131821   | Leafy spurge | 3   |                                                                                         |
|        | DV140028   | Leafy spurge | 3   | weakly similar to UniRef100_Q84XY7 Cluster: Wax synthase isoform 3                      |
|        | DV143169   | Leafy spurge | 3   | similar to UniRef100_A7QBV4 Cluster: Chromosome chr1 scaffold_75                        |
|        | DV148430   | Leafy spurge | 3   |                                                                                         |
|        | DV149203   | Leafy spurge | 3   | similar to UniRef100_A7QPN6 Cluster: Chromosome chr10 scaffold_138                      |
|        | TC2739     | Leafy spurge | 3   |                                                                                         |
|        | TC591      | Leafy spurge | 3   | similar to UniRef100_Q468U9 Cluster: Uncharacterized ABC transporter ATPase component   |
|        | TC9343     | Leafy spurge | 3   | weakly similar to UniRef100_Q84XY8 Cluster: Wax synthase isoform 2                      |

|        |            |              |     |                                                                                            |
|--------|------------|--------------|-----|--------------------------------------------------------------------------------------------|
|        | DB920338   | Cassava      | 3   | weakly similar to UniRef100_Q8TAA5 Cluster: GrpE protein homolog 2 mitochondrial precursor |
|        | TC10125    | Cassava      | 3   | similar to UniRef100_Q8LCU5 Cluster: Transmembrane transport protein-like protein          |
|        | TC2259     | Cassava      | 3   | homologue to UniRef100_Q8LCU5 Cluster: Transmembrane transport protein-like protein        |
|        | TC6806     | Cassava      | 3   | similar to UniRef100_Q9ASS2 Cluster: At1g20110/T20H2_10                                    |
| miR472 | DV139237   | Leafy spurge | 2.5 | weakly similar to UniRef100_A7RID9 Cluster: Chromosome undetermined scaffold_347           |
|        | TC7182     | Leafy spurge | 2.5 |                                                                                            |
|        | TC1198     | Cassava      | 2.5 | similar to UniRef100_A7QL00 Cluster: Chromosome chr8 scaffold_115                          |
|        | TC9476     | Cassava      | 2.5 | similar to UniRef100_Q0J400 Cluster: Os08g0543500 protein                                  |
|        | DR086205   | Cassava      | 2.5 | similar to UniRef100_A7PTG7 Cluster: Chromosome chr8 scaffold_29                           |
|        | DV441463   | Cassava      | 2.5 | similar to UniRef100_A7SK29 Cluster: Predicted protein                                     |
|        | TC1013     | Cassava      | 2.5 | homologue to UniRef100_Q9ZSW9 Cluster: Translationally-controlled tumor protein homolog    |
|        | TC10913    | Cassava      | 2.5 | homologue to UniRef100_Q9ZSW9 Cluster: Translationally-controlled tumor protein homolog    |
|        | TC38       | Cassava      | 2.5 | homologue to UniRef100_Q9ZSW9 Cluster: Translationally-controlled tumor protein homolog    |
|        | EC600343.1 | rubber tree  | 3   | Y41E05 YLX600 Hevea brasiliensis cDNA clone Y41E05 5'                                      |
|        | EC601453.1 | rubber tree  | 3   | Y23D11 YLX600 Hevea brasiliensis cDNA clone Y23D11 5'                                      |
|        | EC606082.1 | rubber tree  | 3   | Y60E11 YLX600 Hevea brasiliensis cDNA clone Y60E11 5'                                      |
|        | EC609011.1 | rubber tree  | 3   | Y35H06 YLX600 Hevea brasiliensis cDNA clone Y35H06 5'                                      |
|        | DV112212   | Leafy spurge | 3   | similar to UniRef100_A7P6S2 Cluster: Chromosome chr9 scaffold_7                            |
|        | DV138161   | Leafy spurge | 3   | similar to UniRef100_Q95UN8 Cluster: Mitogen-activated protein kinase kinase               |
|        | TC1943     | Leafy spurge | 3   | similar to UniRef100_O81288 Cluster: T14P8.5                                               |
|        | TC5477     | Leafy spurge | 3   | similar to UniRef100_A7P0F8 Cluster: Chromosome chr19 scaffold_4                           |
|        | DV138161   | Leafy spurge | 3   | similar to UniRef100_Q95UN8 Cluster: Mitogen-activated protein kinase kinase               |
|        | TC4665     | Leafy spurge | 3   | weakly similar to UniRef100_Q3BML8 Cluster: Methyltransferase gidB                         |
|        | DV126239   | Leafy spurge | 3   | weakly similar to UniRef100_A7PQB4 Cluster: Chromosome chr18 scaffold_24                   |
|        | DV135772   | Leafy spurge | 3   | weakly similar to UniRef100_A7QLV1 Cluster: Chromosome chr18 scaffold_122                  |
|        | DV135983   | Leafy spurge | 3   | weakly similar to UniRef100_Q98196 Cluster: MC028L                                         |
|        | TC3256     | Leafy spurge | 3   | similar to UniRef100_Q7X998 Cluster: MRNA-binding protein                                  |

|        |          |              |     |                                                                                                          |
|--------|----------|--------------|-----|----------------------------------------------------------------------------------------------------------|
|        | TC3829   | Leafy spurge | 3   | similar to UniRef100_Q7X998 Cluster: mRNA-binding protein                                                |
|        | FG807299 | Cassava      | 3   | similar to UniRef100_Q9XZU7 Cluster: Bip2 protein                                                        |
|        | TC7050   | Cassava      | 3   | similar to UniRef100_Q1HGG1 Cluster: Abscisic acid responsive element-binding protein 2                  |
|        | CK647645 | Cassava      | 3   | similar to UniRef100_A7Q2F1 Cluster: Chromosome chr1 scaffold_46                                         |
|        | TC7323   | Cassava      | 3   | similar to UniRef100_Q0JIM5 Cluster: Os01g0789500 protein                                                |
|        | DB931515 | Cassava      | 3   | weakly similar to UniRef100_A7QQ78 Cluster: Chromosome undetermined scaffold_141                         |
|        | DB931515 | Cassava      | 3   | weakly similar to UniRef100_A7QQ78 Cluster: Chromosome undetermined scaffold_141                         |
|        | FF381923 | Cassava      | 3   | similar to UniRef100_A7Q102 Cluster: Chromosome chr7 scaffold_42                                         |
| miR479 | TC4794   | Leafy spurge | 0.5 |                                                                                                          |
|        | TC4794   | Leafy spurge | 0.5 |                                                                                                          |
|        | DV451389 | Cassava      | 3   | similar to UniRef100_A9S3F9 Cluster: Predicted protein                                                   |
|        | DV451389 | Cassava      | 3   | similar to UniRef100_A9S3F9 Cluster: Predicted protein                                                   |
| miR482 | TC4665   | Leafy spurge | 2   | weakly similar to UniRef100_Q3BML8 Cluster: Methyltransferase gidB                                       |
|        | TC4665   | Leafy spurge | 2.5 | weakly similar to UniRef100_Q3BML8 Cluster: Methyltransferase gidB                                       |
|        | DB924949 | Cassava      | 2.5 |                                                                                                          |
|        | TC7050   | Cassava      | 2.5 | similar to UniRef100_Q1HGG1 Cluster: Abscisic acid responsive element-binding protein 2                  |
|        | CK647645 | Cassava      | 2.5 | similar to UniRef100_A7Q2F1 Cluster: Chromosome chr1 scaffold_46                                         |
|        | DV122176 | Leafy spurge | 3   |                                                                                                          |
|        | DV138836 | Leafy spurge | 3   | similar to UniRef100_A7PSN8 Cluster: Chromosome chr6 scaffold_28                                         |
|        | DV143926 | Leafy spurge | 3   |                                                                                                          |
|        | DV156900 | Leafy spurge | 3   |                                                                                                          |
|        | DV139599 | Leafy spurge | 3   | similar to UniRef100_A7PFB8 Cluster: Chromosome chr11 scaffold_14                                        |
|        | DV135907 | Leafy spurge | 3   | similar to UniRef100_A7Q405 Cluster: Chromosome chr13 scaffold_48 whole genome shotgun sequence          |
|        | DB931515 | Cassava      | 3   | weakly similar to UniRef100_A7QQ78 Cluster: Chromosome undetermined scaffold_141                         |
|        | TC5479   | Cassava      | 3   | similar to UniRef100_A7P5H5 Cluster: Chromosome chr4 scaffold_6                                          |
|        | TC6590   | Cassava      | 3   | similar to UniRef100_A7Q0K1 Cluster: Chromosome chr7 scaffold_42                                         |
|        | TC9203   | Cassava      | 3   | similar to UniRef100_A5E0D8 Cluster: Predicted protein                                                   |
| miR530 | DB923881 | Cassava      | 1   | weakly similar to UniRef100_Q9FIX7 Cluster: Arabidopsis thaliana genomic DNA chromosome 5 TAC clone:K9D7 |

|        |            |              |     |                                                                                                             |
|--------|------------|--------------|-----|-------------------------------------------------------------------------------------------------------------|
|        | DB923881   | Cassava      | 1   | weakly similar to UniRef100_Q9FIX7 Cluster: Arabidopsis thaliana genomic DNA chromosome 5 TAC clone:K9D7    |
|        | DB921461   | Cassava      | 2   | homologue to UniRef100_Q2IKL2 Cluster: Tetratricopeptide repeat protein precursor                           |
|        | DB921461   | Cassava      | 2   | homologue to UniRef100_Q2IKL2 Cluster: Tetratricopeptide repeat protein precursor                           |
|        | EC603870.1 | rubber tree  | 3   | Y37C06 YLX600 Hevea brasiliensis cDNA clone Y37C06 5'                                                       |
|        | EC603870.1 | rubber tree  | 3   | Y37C06 YLX600 Hevea brasiliensis cDNA clone Y37C06 5'                                                       |
|        | DV126916   | Leafy spurge | 3   | similar to UniRef100_Q9SWS9 Cluster: Ribosomal protein S26                                                  |
|        | DV126972   | Leafy spurge | 3   | similar to UniRef100_A9RMF9 Cluster: Predicted protein                                                      |
|        | DV138632   | Leafy spurge | 3   | similar to UniRef100_A7PRN7 Cluster: Chromosome chr14 scaffold_27                                           |
|        | DV126916   | Leafy spurge | 3   | similar to UniRef100_Q9SWS9 Cluster: Ribosomal protein S26                                                  |
|        | DV126972   | Leafy spurge | 3   | similar to UniRef100_A9RMF9 Cluster: Predicted protein                                                      |
|        | DV138632   | Leafy spurge | 3   | similar to UniRef100_A7PRN7 Cluster: Chromosome chr14 scaffold_27                                           |
|        | CK646437   | Cassava      | 3   | similar to UniRef100_A7Q9R4 Cluster: Chromosome chr5 scaffold_67                                            |
|        | DB938130   | Cassava      | 3   | homologue to UniRef100_Q0DDZ8 Cluster: Os06g0186600 protein                                                 |
|        | DV444915   | Cassava      | 3   |                                                                                                             |
|        | DV452403   | Cassava      | 3   | similar to UniRef100_A7NW73 Cluster: Chromosome chr5 scaffold_2                                             |
|        | TC4007     | Cassava      | 3   | starch synthase isoform I;glycosyl transferase                                                              |
|        | CK646437   | Cassava      | 3   | similar to UniRef100_A7Q9R4 Cluster: Chromosome chr5 scaffold_67                                            |
|        | DB938130   | Cassava      | 3   | homologue to UniRef100_Q0DDZ8 Cluster: Os06g0186600 protein                                                 |
|        | DV444915   | Cassava      | 3   |                                                                                                             |
|        | DV452403   | Cassava      | 3   | similar to UniRef100_A7NW73 Cluster: Chromosome chr5 scaffold_2                                             |
|        | TC4007     | Cassava      | 3   | starch synthase isoform I;glycosyl transferase                                                              |
| miR535 | TC234      | Leafy spurge | 1.5 |                                                                                                             |
|        | TC234      | Leafy spurge | 2   |                                                                                                             |
|        | TC7395     | Cassava      | 2   | weakly similar to UniRef100_Q9FY94 Cluster: Senescence-associated protein                                   |
|        | DV131970   | Leafy spurge | 2.5 | similar to UniRef100_A6QWU5 Cluster: Predicted protein                                                      |
|        | DB928603   | Cassava      | 2.5 | similar to UniRef100_Q4S269 Cluster: Chromosome undetermined SCAF14764                                      |
|        | DB928603   | Cassava      | 2.5 | similar to UniRef100_Q4S269 Cluster: Chromosome undetermined SCAF14764                                      |
|        | DV151788   | Leafy spurge | 3   | similar to UniRef100_P28166-2 Cluster: Isoform 2 of P28166                                                  |
|        | TC5481     | Leafy spurge | 3   | similar to UniRef100_Q9LLY4 Cluster: 1-acyl-sn-glycerol-3-phosphate acyltransferase 1 chloroplast precursor |
|        | DV131970   | Leafy spurge | 3   | similar to UniRef100_A6QWU5 Cluster: Predicted protein                                                      |
|        | TC4089     | Cassava      | 3   | similar to UniRef100_Q111D6 Cluster: Hypoxia-responsive family protein                                      |

|          |            |              |              |                                                                                                                          |
|----------|------------|--------------|--------------|--------------------------------------------------------------------------------------------------------------------------|
| miR775   | TC5560     | Cassava      | 3            | homologue to UniRef100_P29344 Cluster: 30S ribosomal protein S1 chloroplast precursor                                    |
| miR827   | TC1622     | Cassava      | 1            | similar to UniRef100_A7QKE3 Cluster: Chromosome chr2 scaffold_112                                                        |
|          | TC1622     | Cassava      | 1            | similar to UniRef100_A7QKE3 Cluster: Chromosome chr2 scaffold_112                                                        |
|          | DV143624   | Leafy spurge | 2.5          | similar to UniRef100_A7PJ47 Cluster: Chromosome chr12 scaffold_18                                                        |
|          | DV143624   | Leafy spurge | 2.5          | similar to UniRef100_A7PJ47 Cluster: Chromosome chr12 scaffold_18                                                        |
|          | TC5708     | Leafy spurge | 3            | similar to UniRef100_A7QM36 Cluster: Chromosome undetermined scaffold_123                                                |
|          | TC5708     | Leafy spurge | 3            | similar to UniRef100_A7QM36 Cluster: Chromosome undetermined scaffold_123                                                |
|          | TC6412     | Cassava      | 3            |                                                                                                                          |
|          | TC6412     | Cassava      | 3            |                                                                                                                          |
| miR843   | EC602906.1 | rubber tree  | 2.5          | Y35B04 YLX600 Hevea brasiliensis cDNA clone Y35B04 5'                                                                    |
|          | EC609336.1 | rubber tree  | 2.5          | Y44E10 YLX600 Hevea brasiliensis cDNA clone Y44E10 5'                                                                    |
|          | EC609373.1 | rubber tree  | 2.5          | Y29B11 YLX600 Hevea brasiliensis cDNA clone Y29B11 5'                                                                    |
|          | EC605528.1 | rubber tree  | 3            | LatexY05A06 YLX600 Hevea brasiliensis cDNA clone LatexY05A06 5'                                                          |
|          | TC1302     | Leafy spurge | 3            | similar to UniRef100_Q96256 Cluster: AR781                                                                               |
|          | DV140539   | Leafy spurge | 3            | weakly similar to UniRef100_Q0D GK0 Cluster: Os05g0527300 protein                                                        |
|          | DR087478   | Cassava      | 3            |                                                                                                                          |
|          | DV446926   | Cassava      | 3            | similar to UniRef100_A7NV42 Cluster: Chromosome chr18 scaffold_1                                                         |
|          | TC653      | Cassava      | 3            | weakly similar to UniRef100_Q6BQP9 Cluster: Debaryomyces hansenii chromosome E of strain CBS767 of Debaryomyces hansenii |
|          | TC804      | Cassava      | 3            | similar to UniRef100_A7QR88 Cluster: Chromosome chr13 scaffold_149                                                       |
|          | DB935946   | Cassava      | 3            | weakly similar to UniRef100_Q70G32 Cluster: Hydroxycinnamoyl CoA quinate transferase                                     |
|          | DR087478   | Cassava      | 3            |                                                                                                                          |
|          | TC10186    | Cassava      | 3            | similar to UniRef100_A7QW61 Cluster: Chromosome chr3 scaffold_199                                                        |
|          | TC653      | Cassava      | 3            | weakly similar to UniRef100_Q6BQP9 Cluster: Debaryomyces hansenii chromosome E of strain CBS767 of Debaryomyces hansenii |
|          | TC804      | Cassava      | 3            | similar to UniRef100_A7QR88 Cluster: Chromosome chr13 scaffold_149                                                       |
|          | miR858     | TC1332       | Leafy spurge | 2                                                                                                                        |
| TC2931   |            | Leafy spurge | 2.5          | similar to UniRef100_A7KTI5 Cluster: MYB1                                                                                |
| CK644396 |            | Cassava      | 2.5          | homologue to UniRef100_Q06H33 Cluster: Transcription factor Myb1                                                         |
| DV146623 |            | Leafy spurge | 3            | similar to UniRef100_A7QY25 Cluster: Chromosome undetermined scaffold_237                                                |
| TC2142   |            | Leafy spurge | 3            |                                                                                                                          |
| TC4744   |            | Leafy spurge | 3            | homologue to UniRef100_Q9ATD5 Cluster: GHMYB10                                                                           |
| DB924140 |            | Cassava      | 3            | similar to UniRef100_A7P4S7 Cluster: Chromosome chr4 scaffold_6                                                          |
| miR1507  | TC3650     | Cassava      | 1.5          | homologue to UniRef100_Q84XG0 Cluster: NBS-LRR resistance protein RGH1                                                   |

|         |            |              |     |                                                                                                                                                                      |
|---------|------------|--------------|-----|----------------------------------------------------------------------------------------------------------------------------------------------------------------------|
|         | DV457784   | Cassava      | 2.5 | similar to UniRef100_A9SIY2 Cluster: Predicted protein                                                                                                               |
|         | DV126396   | Leafy spurge | 3   |                                                                                                                                                                      |
|         | DV155509   | Leafy spurge | 3   | similar to UniRef100_A7QYT0 Cluster: Chromosome undetermined scaffold_254                                                                                            |
|         | TC4312     | Leafy spurge | 3   | similar to UniRef100_Q10RZ6 Cluster: Expressed protein                                                                                                               |
| miR1508 | DV143233   | Leafy spurge | 2   |                                                                                                                                                                      |
|         | TC10650    | Leafy spurge | 2   | similar to UniRef100_A7PY96 Cluster: Chromosome chr15 scaffold_37                                                                                                    |
|         | TC3357     | Leafy spurge | 2.5 |                                                                                                                                                                      |
|         | TC6429     | Leafy spurge | 2.5 | similar to UniRef100_A7QW11 Cluster: Chromosome undetermined scaffold_197                                                                                            |
|         | CK641437   | Cassava      | 2.5 | similar to UniRef100_Q9FUC2 Cluster: Nitrate reductase                                                                                                               |
|         | DB953687   | Cassava      | 2.5 | similar to UniRef100_A7QUT5 Cluster: Chromosome chr1 scaffold_180                                                                                                    |
|         | TC1483     | Cassava      | 2.5 | similar to UniRef100_A7PD37 Cluster: Chromosome chr17 scaffold_12                                                                                                    |
|         | EC600935.1 | rubber tree  | 3   | Y08G07 YLX600 Hevea brasiliensis cDNA clone Y08G07 5'                                                                                                                |
|         | EC603009.1 | rubber tree  | 3   | Y60B04 YLX600 Hevea brasiliensis cDNA clone Y60B04 5'                                                                                                                |
|         | EC609825.1 | rubber tree  | 3   | Y79G09 YLX600 Hevea brasiliensis cDNA clone Y79G09 5'                                                                                                                |
|         | GD273247.1 | rubber tree  | 3   | EST254 cDNAs prepared from latex vessel cells of rubber tree Hevea brasiliensis<br>cDNA similar to Populus EST from mild drought-stressed leaves                     |
|         | GD273260.1 | rubber tree  | 3   | EST267 cDNAs prepared from latex vessel cells of rubber tree Hevea brasiliensis<br>cDNA similar to Populus trichocarpa clone WS0111_N22                              |
|         | GR305289.1 | rubber tree  | 3   | TPD_SSH_LD175 Transcripts specific to latex of TPD affected trees of Hevea<br>brasiliensis Hevea brasiliensis cDNA similar to DEAD BOX ATP DEPENDENT<br>RNA HELICASE |
|         | DV122625   | Leafy spurge | 3   | similar to UniRef100_O13760 Cluster: Uncharacterized membrane protein<br>C17A2.10c precursor                                                                         |
|         | DV132352   | Leafy spurge | 3   | similar to UniRef100_Q6XCA0 Cluster: GPR34-like GPCR                                                                                                                 |
|         | DV135835   | Leafy spurge | 3   | homologue to UniRef100_A7P8W7 Cluster: Chromosome chr3 scaffold_8                                                                                                    |
|         | DV147978   | Leafy spurge | 3   |                                                                                                                                                                      |
|         | DV153231   | Leafy spurge | 3   | similar to UniRef100_Q8RVV8 Cluster: DCL protein                                                                                                                     |
|         | DV154910   | Leafy spurge | 3   |                                                                                                                                                                      |
|         | TC5689     | Leafy spurge | 3   | similar to UniRef100_Q9SXX9 Cluster: Heat shock factor                                                                                                               |
|         | TC9346     | Leafy spurge | 3   | similar to UniRef100_Q42463 Cluster: Protein DCL chloroplast precursor                                                                                               |
|         | DV446174   | Cassava      | 3   | similar to UniRef100_A7NUC6 Cluster: Chromosome chr18 scaffold_1                                                                                                     |
|         | TC1306     | Cassava      | 3   | similar to UniRef100_O23787 Cluster: Thiazole biosynthetic enzyme chloroplast<br>precursor                                                                           |
|         | TC2974     | Cassava      | 3   | homologue to UniRef100_Q6RJY1 Cluster: 60S ribosomal protein L12                                                                                                     |
|         | TC6271     | Cassava      | 3   | similar to UniRef100_Q38709 Cluster: Thiazole biosynthetic enzyme chloroplast<br>precursor                                                                           |

|         |            |              |     |                                                                                           |
|---------|------------|--------------|-----|-------------------------------------------------------------------------------------------|
|         | TC908      | Cassava      | 3   | homologue to UniRef100_Q9XG67 Cluster: Glyceraldehyde-3-phosphate dehydrogenase           |
|         | TC9692     | Cassava      | 3   | homologue to UniRef100_Q19N38 Cluster: WD repeat 2                                        |
| miR1509 | DT639292   | Leafy spurge | 2.5 |                                                                                           |
|         | DT639292   | Leafy spurge | 2.5 |                                                                                           |
|         | DB922488   | Cassava      | 3   | homologue to UniRef100_Q39821 Cluster: SDL12A                                             |
|         | DB922488   | Cassava      | 3   | homologue to UniRef100_Q39821 Cluster: SDL12A                                             |
| miR1510 | DV149304   | Leafy spurge | 2   | weakly similar to UniRef100_A7QLV8 Cluster: Chromosome chr18 scaffold_122                 |
|         | TC5791     | Leafy spurge | 2   | homologue to UniRef100_Q76FZ8 Cluster: Brassinosteroid receptor                           |
|         | DV149304   | Leafy spurge | 2   | weakly similar to UniRef100_A7QLV8 Cluster: Chromosome chr18 scaffold_122                 |
|         | TC5791     | Leafy spurge | 2   | homologue to UniRef100_Q76FZ8 Cluster: Brassinosteroid receptor                           |
|         | DV149304   | Leafy spurge | 2   | weakly similar to UniRef100_A7QLV8 Cluster: Chromosome chr18 scaffold_122                 |
|         | TC5791     | Leafy spurge | 2   | homologue to UniRef100_Q76FZ8 Cluster: Brassinosteroid receptor                           |
|         | EC603104.1 | rubber tree  | 3   | Y81A02 YLX600 Hevea brasiliensis cDNA clone Y81A02 5'                                     |
|         | EC603104.1 | rubber tree  | 3   | Y81A02 YLX600 Hevea brasiliensis cDNA clone Y81A02 5'                                     |
|         | EC603104.1 | rubber tree  | 3   | Y81A02 YLX600 Hevea brasiliensis cDNA clone Y81A02 5'                                     |
|         | DV132413   | Leafy spurge | 3   | homologue to UniRef100_A7Q803 Cluster: Chromosome chr18 scaffold_61                       |
|         | DV141456   | Leafy spurge | 3   | weakly similar to UniRef100_Q006M4 Cluster: NBS-LRR resistance gene-like protein ARGH m14 |
|         | DV153358   | Leafy spurge | 3   | UniRef100_A4T6P6 Cluster: FAD-dependent pyridine nucleotide-disulphide oxidoreductase     |
|         | TC5105     | Leafy spurge | 3   | similar to UniRef100_Q8RW17 Cluster: Aux/IAA protein                                      |
|         | TC6662     | Leafy spurge | 3   | similar to UniRef100_A7NSL8 Cluster: Chromosome chr18 scaffold_1                          |
|         | DV132413   | Leafy spurge | 3   | homologue to UniRef100_A7Q803 Cluster: Chromosome chr18 scaffold_61                       |
|         | DV141456   | Leafy spurge | 3   | weakly similar to UniRef100_Q006M4 Cluster: NBS-LRR resistance gene-like protein ARGH m14 |
|         | DV153358   | Leafy spurge | 3   | UniRef100_A4T6P6 Cluster: FAD-dependent pyridine nucleotide-disulphide oxidoreductase     |
|         | TC5105     | Leafy spurge | 3   | similar to UniRef100_Q8RW17 Cluster: Aux/IAA protein                                      |
|         | TC6662     | Leafy spurge | 3   | similar to UniRef100_A7NSL8 Cluster: Chromosome chr18 scaffold_1                          |
|         | DV132413   | Leafy spurge | 3   | homologue to UniRef100_A7Q803 Cluster: Chromosome chr18 scaffold_61                       |
|         | DV141456   | Leafy spurge | 3   | weakly similar to UniRef100_Q006M4 Cluster: NBS-LRR resistance gene-like protein ARGH m14 |
|         | DV153358   | Leafy spurge | 3   | UniRef100_A4T6P6 Cluster: FAD-dependent pyridine nucleotide-disulphide oxidoreductase     |
|         | TC387      | Cassava      | 3   | similar to UniRef100_A7NSL8 Cluster: Chromosome chr18 scaffold_1                          |

|         |            |              |     |                                                                                  |
|---------|------------|--------------|-----|----------------------------------------------------------------------------------|
|         | TC7971     | Cassava      | 3   |                                                                                  |
|         | TC909      | Cassava      | 3   | UniRef100_A0ZQ60 Cluster: ATP synthase subunit beta                              |
|         | TC387      | Cassava      | 3   | similar to UniRef100_A7NSL8 Cluster: Chromosome chr18 scaffold_1                 |
|         | TC7971     | Cassava      | 3   |                                                                                  |
|         | TC909      | Cassava      | 3   | UniRef100_A0ZQ60 Cluster: ATP synthase subunit beta                              |
|         | TC387      | Cassava      | 3   | similar to UniRef100_A7NSL8 Cluster: Chromosome chr18 scaffold_1                 |
|         | TC7971     | Cassava      | 3   |                                                                                  |
|         | TC909      | Cassava      | 3   | UniRef100_A0ZQ60 Cluster: ATP synthase subunit beta                              |
| miR1511 | DV133273   | Leafy spurge | 2.5 | weakly similar to UniRef100_Q6YGT9 Cluster: Purple acid phosphatase-like protein |
|         | DV141199   | Leafy spurge | 2.5 | similar to UniRef100_A7QEK9 Cluster: Chromosome chr17 scaffold_85                |
|         | DB946011   | Cassava      | 3   |                                                                                  |
| miR1512 | DV130172   | Leafy spurge | 2.5 | similar to UniRef100_A7PPG2 Cluster: Chromosome chr8 scaffold_23                 |
|         | TC3736     | Leafy spurge | 3   | similar to UniRef100_A7PNN2 Cluster: Chromosome chr8 scaffold_23                 |
| miR1515 | DB920192   | Cassava      | 2   | similar to UniRef100_A7Q180 Cluster: Chromosome chr10 scaffold_43                |
|         | DB927230   | Cassava      | 2   | similar to UniRef100_A7PL61 Cluster: Chromosome chr7 scaffold_20                 |
|         | TC8788     | Cassava      | 2   | weakly similar to UniRef100_A7NSR7 Cluster: Chromosome chr18 scaffold_1          |
|         | TC3598     | Leafy spurge | 2.5 | similar to UniRef100_Q2V999 Cluster: 40S ribosomal protein S15-like              |
|         | EC600780.1 | rubber tree  | 3   | W703 YLX600 Hevea brasiliensis cDNA clone W703 5'                                |
|         | EC602603.1 | rubber tree  | 3   | LatexY06G09 YLX600 Hevea brasiliensis cDNA clone LatexY06G09 5'                  |
|         | EC608990.1 | rubber tree  | 3   | Y83C09 YLX600 Hevea brasiliensis cDNA clone Y83C09 5'                            |
|         | DT639363   | Leafy spurge | 3   | similar to UniRef100_A8VPP7 Cluster: Pollen-specific polygalacturonase           |
|         | DV126482   | Leafy spurge | 3   | weakly similar to UniRef100_Q866S4 Cluster: Aquaporin 4A                         |
|         | DB921833   | Cassava      | 3   | similar to UniRef100_Q94F64 Cluster: CDPK adapter protein 1                      |
|         | DB931531   | Cassava      | 3   |                                                                                  |
|         | TC1005     | Cassava      | 3   | homologue to UniRef100_A5BPA4 Cluster: 50S ribosomal protein L35                 |
| miR2109 | TC4160     | Cassava      | 3   | similar to UniRef100_A7QML3 Cluster: Chromosome chr19 scaffold_126               |
|         | TC4160     | Cassava      | 3   | similar to UniRef100_A7QML3 Cluster: Chromosome chr19 scaffold_126               |
|         | TC4160     | Cassava      | 3   | similar to UniRef100_A7QML3 Cluster: Chromosome chr19 scaffold_126               |
| miR2111 | DV155799   | Leafy spurge | 2.5 | similar to UniRef100_A7PC90 Cluster: Chromosome chr2 scaffold_11                 |
|         | DV155799   | Leafy spurge | 2.5 | similar to UniRef100_A7PC90 Cluster: Chromosome chr2 scaffold_11                 |
|         | TC7532     | Leafy spurge | 3   | homologue to UniRef100_Q5GMM4 Cluster: 60S ribosomal protein L37a                |
|         | TC7532     | Leafy spurge | 3   | homologue to UniRef100_Q5GMM4 Cluster: 60S ribosomal protein L37a                |
|         | FF535932   | Cassava      | 3   | similar to UniRef100_A7PED2 Cluster: Chromosome chr11 scaffold_13                |
|         | FF535932   | Cassava      | 3   | similar to UniRef100_A7PED2 Cluster: Chromosome chr11 scaffold_13                |
|         | DV457846   | Cassava      | 3   |                                                                                  |

|         |            |              |     |                                                                                                                                      |
|---------|------------|--------------|-----|--------------------------------------------------------------------------------------------------------------------------------------|
| miR2118 | DV154639   | Leafy spurge | 1   | similar to UniRef100_Q0SQV7 Cluster: Serine protease                                                                                 |
|         | TC4665     | Leafy spurge | 2   | weakly similar to UniRef100_Q3BML8 Cluster: Methyltransferase gidB                                                                   |
|         | TC4001     | Leafy spurge | 2.5 | similar to UniRef100_A7PHJ6 Cluster: Chromosome chr17 scaffold_16                                                                    |
|         | DV448856   | Cassava      | 2.5 | similar to UniRef100_Q0DIG2 Cluster: Os05g0392000 protein                                                                            |
|         | DV122176   | Leafy spurge | 3   |                                                                                                                                      |
|         | DV143926   | Leafy spurge | 3   |                                                                                                                                      |
|         | DV156900   | Leafy spurge | 3   |                                                                                                                                      |
| miR2916 | GR305551.1 | rubber tree  | 0   | TPD_SSH_BC23 TPD responsive transcripts of Hevea brasiliensis (TPD affected bark) Hevea brasiliensis cDNA similar to unknown protein |
|         | GR305572.1 | rubber tree  | 0   | TPD_SSH_BC58 TPD responsive transcripts of Hevea brasiliensis (TPD affected bark) Hevea brasiliensis cDNA similar to unknown protein |
|         | TC5378     | Cassava      | 2   | similar to UniRef100_A9RRN1 Cluster: Predicted protein                                                                               |
|         | TC1206     | Cassava      | 2.5 | homologue to UniRef100_Q52PH2 Cluster: Catalase                                                                                      |
|         | TC2192     | Cassava      | 2.5 | homologue to UniRef100_Q94EV9 Cluster: Catalase                                                                                      |
|         | TC4463     | Cassava      | 2.5 | homologue to UniRef100_Q94EV9 Cluster: Catalase                                                                                      |
|         | TC4602     | Cassava      | 2.5 | weakly similar to UniRef100_Q8H6S5 Cluster: CTV.2                                                                                    |
|         | DV451234   | Cassava      | 3   | similar to UniRef100_Q7MAR3 Cluster: Apolipoprotein N-acyltransferase                                                                |
|         | DV457246   | Cassava      | 3   | weakly similar to UniRef100_A7P5I5 Cluster: Chromosome chr4 scaffold_6                                                               |
|         | TC7796     | Cassava      | 3   | similar to UniRef100_A7P8G7 Cluster: Chromosome chr3 scaffold_8                                                                      |
| miR2950 | EC602110.1 | rubber tree  | 3   | LatexY13D10 YLX600 Hevea brasiliensis cDNA clone LatexY13D10 5'                                                                      |
|         | EC602401.1 | rubber tree  | 3   | W841 YLX600 Hevea brasiliensis cDNA clone W841 5'                                                                                    |
|         | EC607633.1 | rubber tree  | 3   | A329 YLX600 Hevea brasiliensis cDNA clone A329 5'                                                                                    |
|         | EC607851.1 | rubber tree  | 3   | A270 YLX600 Hevea brasiliensis cDNA clone A270 5'                                                                                    |
|         | DV123313   | Leafy spurge | 3   | similar to UniRef100_A7NYB7 Cluster: Chromosome chr6 scaffold_3                                                                      |
|         | TC3348     | Leafy spurge | 3   | weakly similar to UniRef100_A7NYB7 Cluster: Chromosome chr6 scaffold_3                                                               |
|         | DB930106   | Cassava      | 3   | similar to UniRef100_A7Q587 Cluster: Chromosome undetermined scaffold_52                                                             |
|         | DV445777   | Cassava      | 3   | similar to UniRef100_Q9LHQ4 Cluster: Genomic DNA chromosome 3 BAC clone: F3H11                                                       |
| miR4413 | DV139473   | Leafy spurge | 2   | similar to UniRef100_A7QSU2 Cluster: DNA topoisomerase                                                                               |
|         | GO349239.1 | rubber tree  | 3   | SSH124 cDNA libraries of the latex from healthy and TPD rubber trees Hevea brasiliensis cDNA clone SSH124                            |
|         | DV150851   | Leafy spurge | 3   | weakly similar to UniRef100_A9TMJ9 Cluster: Predicted protein                                                                        |
|         | FG805220   | Cassava      | 3   | UniRef100_Q6FZ72 Cluster: Outer membrane protein                                                                                     |
|         | TC99       | Cassava      | 3   | weakly similar to UniRef100_A7PEE9 Cluster: Chromosome chr11 scaffold_13                                                             |
| miR4414 | EC607755.1 | rubber tree  | 2.5 | Y27C08 YLX600 Hevea brasiliensis cDNA clone Y27C08 5'                                                                                |
|         | TC8539     | Leafy spurge | 3   | similar to UniRef100_Q0DRT1 Cluster: Os03g0357800 protein                                                                            |

|         |            |              |     |                                                                                                                                                         |                                                                                                                                                                             |
|---------|------------|--------------|-----|---------------------------------------------------------------------------------------------------------------------------------------------------------|-----------------------------------------------------------------------------------------------------------------------------------------------------------------------------|
|         | TC9453     | Cassava      | 3   | similar to UniRef100_A7QR10 Cluster: Chromosome undetermined scaffold_147                                                                               |                                                                                                                                                                             |
| miR5139 | DV133775   | Leafy spurge | 2.5 | similar to UniRef100_A7Z084 Cluster: MGC165989 protein                                                                                                  |                                                                                                                                                                             |
|         |            |              |     |                                                                                                                                                         |                                                                                                                                                                             |
| miR319  | DV144273   | Leafy spurge | 3.5 | weakly similar to UniRef100_O94288 Cluster: Nucleolar complex-associated protein 3                                                                      |                                                                                                                                                                             |
|         | TC3983     | Leafy spurge | 3.5 | similar to UniRef100_A7PWZ6 Cluster: Chromosome chr12 scaffold_36                                                                                       |                                                                                                                                                                             |
|         | TC6456     | Leafy spurge | 3.5 | similar to UniRef100_A7Q165 Cluster: Chromosome chr10 scaffold_43                                                                                       |                                                                                                                                                                             |
|         | TC9962     | Leafy spurge | 3.5 |                                                                                                                                                         |                                                                                                                                                                             |
|         | DV445140   | Cassava      | 3.5 | similar to UniRef100_A7Q165 Cluster: Chromosome chr10 scaffold_43                                                                                       |                                                                                                                                                                             |
|         | TC5455     | Cassava      | 3.5 |                                                                                                                                                         |                                                                                                                                                                             |
|         | TC5724     | Cassava      | 3.5 | similar to UniRef100_A7Q165 Cluster: Chromosome chr10 scaffold_43                                                                                       |                                                                                                                                                                             |
|         | TC6900     | Cassava      | 3.5 |                                                                                                                                                         |                                                                                                                                                                             |
| miR473  | DV131350   | Leafy spurge | 3.5 | similar to UniRef100_A7QT69 Cluster: Chromosome chr1 scaffold_166                                                                                       |                                                                                                                                                                             |
|         | TC9158     | Leafy spurge | 3.5 | similar to UniRef100_A7PPI6 Cluster: Chromosome chr8 scaffold_23                                                                                        |                                                                                                                                                                             |
|         | DB951139   | Cassava      | 3.5 | similar to UniRef100_Q000L0 Cluster: Acetyl-CoA carboxylase                                                                                             |                                                                                                                                                                             |
|         | TC9871     | Cassava      | 3.5 | similar to UniRef100_A7P5X9 Cluster: Chromosome chr4 scaffold_6                                                                                         |                                                                                                                                                                             |
| miR477  | GD273146.1 | rubber tree  | 3.5 | EST153 cDNAs prepared from latex vessel cells of rubber tree Hevea brasiliensis cDNA similar to Hevea brasiliensis small rubber particle protein (SRPP) |                                                                                                                                                                             |
|         | BG317316   | Leafy spurge | 3.5 | similar to UniRef100_A7PEG1 Cluster: Chromosome chr11 scaffold_13                                                                                       |                                                                                                                                                                             |
|         | DV123781   | Leafy spurge | 3.5 | homologue to UniRef100_A7NWX5 Cluster: Chromosome chr5 scaffold_2                                                                                       |                                                                                                                                                                             |
|         | DV131350   | Leafy spurge | 3.5 | similar to UniRef100_A7QT69 Cluster: Chromosome chr1 scaffold_166                                                                                       |                                                                                                                                                                             |
|         | TC9158     | Leafy spurge | 3.5 | similar to UniRef100_A7PPI6 Cluster: Chromosome chr8 scaffold_23                                                                                        |                                                                                                                                                                             |
|         | DB923360   | Cassava      | 3.5 | similar to UniRef100_Q7XDC6 Cluster: Expressed protein                                                                                                  |                                                                                                                                                                             |
|         | DB926601   | Cassava      | 3.5 | similar to UniRef100_A7Q9N2 Cluster: Chromosome chr5 scaffold_67                                                                                        |                                                                                                                                                                             |
| miR824  | DV150265   | Leafy spurge | 3.5 | similar to UniRef100_A7NZN2 Cluster: Chromosome chr6 scaffold_3                                                                                         |                                                                                                                                                                             |
|         | TC2922     | Leafy spurge | 3.5 | similar to UniRef100_Q946Y1 Cluster: Ceramide glucosyltransferase                                                                                       |                                                                                                                                                                             |
|         | TC7262     | Leafy spurge | 3.5 | similar to UniRef100_A7PQW9 Cluster: Chromosome chr6 scaffold_25                                                                                        |                                                                                                                                                                             |
|         | TC7270     | Leafy spurge | 3.5 |                                                                                                                                                         |                                                                                                                                                                             |
|         | TC9871     | Leafy spurge | 3.5 | similar to UniRef100_A7P3J5 Cluster: Chromosome chr1 scaffold_5                                                                                         |                                                                                                                                                                             |
|         |            |              |     |                                                                                                                                                         | weakly similar to UniRef100_UPI00015A6666 Cluster: Probable RNA-binding protein 25 (RNA-binding motif protein 25) (RNA-binding region-containing protein 7) (Protein S164). |
|         | DB929583   | Cassava      | 3.5 |                                                                                                                                                         |                                                                                                                                                                             |
|         | TC7660     | Cassava      | 3.5 | similar to UniRef100_A7Q5G7 Cluster: Chromosome undetermined scaffold_53                                                                                |                                                                                                                                                                             |
| miR2911 | GR305630.1 | rubber tree  | 3.5 | TPD_SSH_BC127 TPD responsive transcripts of Hevea brasiliensis (TPD affected bark) Hevea brasiliensis cDNA similar to unknown protein                   |                                                                                                                                                                             |

|            |              |     |                                                                                                                                       |
|------------|--------------|-----|---------------------------------------------------------------------------------------------------------------------------------------|
| GR305630.1 | rubber tree  | 3.5 | TPD_SSH_BC127 TPD responsive transcripts of Hevea brasiliensis (TPD affected bark) Hevea brasiliensis cDNA similar to unknown protein |
| GR305630.1 | rubber tree  | 3.5 | TPD_SSH_BC127 TPD responsive transcripts of Hevea brasiliensis (TPD affected bark) Hevea brasiliensis cDNA similar to unknown protein |
| BI993496   | Leafy spurge | 3.5 | weakly similar to UniRef100_UPI000069EF13 Cluster: nephronectin                                                                       |
| DV129965   | Leafy spurge | 3.5 | weakly similar to UniRef100_A7NXI4 Cluster: Chromosome chr5 scaffold_2                                                                |
| DV140287   | Leafy spurge | 3.5 | similar to UniRef100_Q21NZ0 Cluster: Endoglucanase-like protein                                                                       |
| DV126965   | Leafy spurge | 3.5 | similar to UniRef100_A7PVW6 Cluster: Chromosome chr8 scaffold_34                                                                      |
| DV129965   | Leafy spurge | 3.5 | weakly similar to UniRef100_A7NXI4 Cluster: Chromosome chr5 scaffold_2                                                                |
| TC9944     | Leafy spurge | 3.5 | similar to UniRef100_A7QXR5 Cluster: Chromosome undetermined scaffold_229                                                             |
| BI993496   | Leafy spurge | 3.5 | weakly similar to UniRef100_UPI000069EF13 Cluster: nephronectin                                                                       |
| DV126965   | Leafy spurge | 3.5 | similar to UniRef100_A7PVW6 Cluster: Chromosome chr8 scaffold_34                                                                      |
| DV129965   | Leafy spurge | 3.5 | weakly similar to UniRef100_A7NXI4 Cluster: Chromosome chr5 scaffold_2                                                                |
| TC9944     | Leafy spurge | 3.5 | similar to UniRef100_A7QXR5 Cluster: Chromosome undetermined scaffold_229                                                             |
| DB936286   | Cassava      | 3.5 | similar to UniRef100_Q9ZPE6 Cluster: T3H13.2 protein                                                                                  |
| TC4845     | Cassava      | 3.5 | similar to UniRef100_Q6E439 Cluster: ACT11D09.3                                                                                       |
| DB936286   | Cassava      | 3.5 | similar to UniRef100_Q9ZPE6 Cluster: T3H13.2 protein                                                                                  |
| TC4845     | Cassava      | 3.5 | similar to UniRef100_Q6E439 Cluster: ACT11D09.3                                                                                       |

# Target Acc.: target accession numbers. For the target genes predicted from rubber tree ESTs, the accession numbers are from Genbank. The accession numbers for the other targets are from Euphorbia esula (leafy spurge) DFCI gene index release 1 or Manihot esculenta (cassava) DFCI gene index release 1.

& Database: the database from which the targets were predicted.

\* Expectation: the scores given by the target prediction program. In the 0-5 scale, a score of 0-2 represents a stringent cutoff.
