# Supplementary material
Source: PubMed Central journal article supplement (PMC3405184)
Supplement: NIHMS365062-supplement-6.pdf [file NIHMS365062-supplement-6.pdf]

**Supplemental Table 4. Predicted targets of miRNA\*s detected in the rubber tree small RNA libraries.**

| miRNA* ID | Target Acc.# | Database&    | Expectation* | Target Description                                                                               |
|-----------|--------------|--------------|--------------|--------------------------------------------------------------------------------------------------|
| miR156*   | EC601929.1   | rubber tree  | 3            | W147 YLX600 Hevea brasiliensis cDNA clone W147 5'                                                |
|           | TC6504       | Cassava      | 3            | homologue to UniRef100_A9V3I4 Cluster: Predicted protein                                         |
| miR157*   | TC3142       | Leafy spurge | 2.5          | similar to UniRef100_A7Q511 Cluster: Chromosome undetermined scaffold_51                         |
|           | DV123826     | Leafy spurge | 3            | homologue to UniRef100_Q480W3 Cluster: Zinc carboxypeptidase family protein                      |
|           | TC3486       | Cassava      | 3            | homologue to UniRef100_Q8W0W5 Cluster: Repressor protein                                         |
| miR159*   | TC3446       | Leafy spurge | 2            | similar to UniRef100_A7PZA4 Cluster: Chromosome chr15 scaffold_40                                |
|           | TC8317       | Leafy spurge | 3            | similar to UniRef100_A7QN97 Cluster: Chromosome chr2 scaffold_132                                |
| miR160*   | DV138293     | Leafy spurge | 2.5          | similar to UniRef100_A7PXL8 Cluster: Chromosome chr12 scaffold_36                                |
|           | DB932318     | Cassava      | 2.5          | similar to UniRef100_A7QYJ3 Cluster: Chromosome undetermined scaffold_248                        |
|           | TC3271       | Cassava      | 2.5          | similar to UniRef100_A7QYJ3 Cluster: Chromosome undetermined scaffold_248                        |
|           | DV141695     | Leafy spurge | 3            | similar to UniRef100_Q2UBR6 Cluster: Predicted protein                                           |
| miR162*   | DV153829     | Leafy spurge | 3            | weakly similar to UniRef100_A6PP86 Cluster: Helix-turn-helix-domain containing protein AraC type |
|           | DB920810     | Cassava      | 3            | similar to UniRef100_Q9SAF1 Cluster: F3F19.20 protein                                            |
|           | TC2881       | Cassava      | 3            | similar to UniRef100_P29685 Cluster: ATP synthase subunit beta mitochondrial precursor           |
|           | TC8601       | Cassava      | 3            |                                                                                                  |
| miR164*   | EC603964.1   | rubber tree  | 3            | Y70A02 YLX600 Hevea brasiliensis cDNA clone Y70A02 5'                                            |
|           | EC605827.1   | rubber tree  | 3            | Y41C10 YLX600 Hevea brasiliensis cDNA clone Y41C10 5'                                            |
|           | EC606195.1   | rubber tree  | 3            | Y46D04 YLX600 Hevea brasiliensis cDNA clone Y46D04 5'                                            |
|           | EC606897.1   | rubber tree  | 3            | Y28E02 YLX600 Hevea brasiliensis cDNA clone Y28E02 5'                                            |
|           | EC606898.1   | rubber tree  | 3            | Y32G04 YLX600 Hevea brasiliensis cDNA clone Y32G04 5'                                            |
|           | EC608381.1   | rubber tree  | 3            | Y41B10 YLX600 Hevea brasiliensis cDNA clone Y41B10 5'                                            |
|           | EC608933.1   | rubber tree  | 3            | Y17G04 YLX600 Hevea brasiliensis cDNA clone Y17G04 5'                                            |
|           | DV135150     | Leafy spurge | 3            | similar to UniRef100_A7PPE8 Cluster: Chromosome chr8 scaffold_23                                 |
|           | TC7109       | Cassava      | 3            | similar to UniRef100_A7Q2L3 Cluster: Chromosome chr1 scaffold_46                                 |
| miR165*   | DV456330     | Cassava      | 2.5          | similar to UniRef100_A7PSY4 Cluster: Chromosome chr8 scaffold_29                                 |
|           | TC10052      | Cassava      | 2.5          | similar to UniRef100_A7PZN1 Cluster: Chromosome chr15 scaffold_40                                |
|           | DV153724     | Leafy spurge | 3            | weakly similar to UniRef100_A7QCU1 Cluster: Chromosome undetermined scaffold_79                  |
|           | TC1239       | Leafy spurge | 3            | weakly similar to UniRef100_UPI000004821D Cluster: protein kinase family protein                 |
|           | TC4139       | Leafy spurge | 3            | similar to UniRef100_A8BLZ0 Cluster: Kinase-like protein                                         |
|           | DV449693     | Cassava      | 3            | weakly similar to UniRef100_Q8W1F0 Cluster: Kinase R-like protein                                |
|           | TC3415       | Cassava      | 3            | similar to UniRef100_A7QP58 Cluster: Chromosome chr1 scaffold_136                                |
|           | TC5604       | Cassava      | 3            | similar to UniRef100_Q56Y11 Cluster: Dehydrodolichyl diphosphate synthase 2                      |

|                 |            |              |         |                                                                                              |
|-----------------|------------|--------------|---------|----------------------------------------------------------------------------------------------|
| miR166*         | DB925634   | Cassava      | 3       | similar to UniRef100_A1KYA8 Cluster: Cytochrome c oxidase subunit 1                          |
|                 | DV456330   | Cassava      | 3       | similar to UniRef100_A7PSY4 Cluster: Chromosome chr8 scaffold_29                             |
|                 | TC6887     | Cassava      | 3       | similar to UniRef100_A7Q9B0 Cluster: Chromosome chr19 scaffold_66                            |
| miR167*         | DB936193   | Cassava      | 2.5     | homologue to UniRef100_A8QG34 Cluster: 60Kd inner membrane protein                           |
|                 | TC5340     | Cassava      | 2.5     | homologue to UniRef100_A7QIK3 Cluster: Chromosome chr9 scaffold_104                          |
|                 | DV127192   | Leafy spurge | 3       | weakly similar to UniRef100_Q2UL89 Cluster: Uncharacterized conserved protein                |
|                 | DV150253   | Leafy spurge | 3       | similar to UniRef100_A7Q0I0 Cluster: Chromosome chr7 scaffold_42                             |
|                 | DV151673   | Leafy spurge | 3       | homologue to UniRef100_A7NWN0 Cluster: Chromosome chr5 scaffold_2                            |
|                 | TC360      | Leafy spurge | 3       | similar to UniRef100_A7NW39 Cluster: Chromosome chr5 scaffold_2                              |
|                 | TC775      | Leafy spurge | 3       | weakly similar to UniRef100_A7Q951 Cluster: Chromosome chr19 scaffold_66                     |
|                 | TC8078     | Leafy spurge | 3       | similar to UniRef100_A7PWA4 Cluster: Chromosome chr8 scaffold_34                             |
|                 | TC2710     | Cassava      | 3       | weakly similar to UniRef100_A7NTN2 Cluster: Chromosome chr18 scaffold_1                      |
|                 | DB933541   | Cassava      | 3       | homologue to UniRef100_P34788 Cluster: 40S ribosomal protein S18                             |
|                 | FG807161   | Cassava      | 3       | similar to UniRef100_A7QJ51 Cluster: Chromosome chr2 scaffold_105                            |
|                 | TC3010     | Cassava      | 3       | homologue to UniRef100_A0EJL8 Cluster: GDP-D-mannose-3' 5'-epimerase                         |
|                 | TC3048     | Cassava      | 3       | similar to UniRef100_A7P6Q1 Cluster: Chromosome chr9 scaffold_7                              |
|                 | TC699      | Cassava      | 3       | homologue to UniRef100_P34788 Cluster: 40S ribosomal protein S18                             |
|                 | miR168*    | TC5824       | Cassava | 3                                                                                            |
| TC5824          |            | Cassava      | 3       | similar to UniRef100_Q9LTS5 Cluster: Nucleosome assembly protein                             |
| miR170*/miR171* | TC49       | Leafy spurge | 3       | similar to UniRef100_A7QA87 Cluster: Chromosome undetermined scaffold_70                     |
|                 | DB934102   | Cassava      | 3       | weakly similar to UniRef100_A7QJB0 Cluster: Chromosome chr8 scaffold_106                     |
| miR172*         | CK645041   | Cassava      | 1.5     | homologue to UniRef100_A0ZCI3 Cluster: ABC transporter-like protein                          |
|                 | DB951894   | Cassava      | 1.5     | weakly similar to UniRef100_A8L5D0 Cluster: Peptidoglycan-binding domain 1 protein precursor |
|                 | DV449432   | Cassava      | 1.5     | weakly similar to UniRef100_A9HMI2 Cluster: Transcriptional regulator Crp/Fnr family         |
|                 | DV157186   | Leafy spurge | 2.5     | similar to UniRef100_A7Q281 Cluster: Chromosome chr13 scaffold_45                            |
|                 | FG806870   | Cassava      | 2.5     | similar to UniRef100_A7P521 Cluster: Chromosome chr4 scaffold_6                              |
|                 | EC603229.1 | rubber tree  | 3       | Y23F09 YLX600 Hevea brasiliensis cDNA clone Y23F09 5'                                        |
|                 | EC603229.1 | rubber tree  | 3       | Y23F09 YLX600 Hevea brasiliensis cDNA clone Y23F09 5'                                        |
|                 | DV137558   | Leafy spurge | 3       | similar to UniRef100_A7P2I5 Cluster: Chromosome chr1 scaffold_5                              |
|                 | TC9895     | Leafy spurge | 3       | homologue to UniRef100_A7P9B0 Cluster: Chromosome chr3 scaffold_8                            |
|                 | DV133148   | Leafy spurge | 3       |                                                                                              |
|                 | DV133148   | Leafy spurge | 3       |                                                                                              |
|                 | DV448611   | Cassava      | 3       | similar to UniRef100_A0MNJ9 Cluster: CBL-interacting protein kinase 12                       |

|         |            |              |     |                                                                                                                |
|---------|------------|--------------|-----|----------------------------------------------------------------------------------------------------------------|
|         | TC6168     | Cassava      | 3   | homologue to UniRef100_A7QHZ1 Cluster: Chromosome chr17 scaffold_101                                           |
|         | TC6670     | Cassava      | 3   | similar to UniRef100_A7QE81 Cluster: Chromosome chr4 scaffold_83                                               |
|         | TC7355     | Cassava      | 3   | similar to UniRef100_A0MKN0 Cluster: CBL-interacting protein kinase 13                                         |
|         | CK645041   | Cassava      | 3   | homologue to UniRef100_A0ZCI3 Cluster: ABC transporter-like protein                                            |
|         | CK651932   | Cassava      | 3   |                                                                                                                |
|         | DB951894   | Cassava      | 3   | weakly similar to UniRef100_A8L5D0 Cluster: Peptidoglycan-binding domain 1 protein precursor                   |
|         | DV449432   | Cassava      | 3   | weakly similar to UniRef100_A9HMI2 Cluster: Transcriptional regulator Crp/Fnr family                           |
|         | CK645041   | Cassava      | 3   | homologue to UniRef100_A0ZCI3 Cluster: ABC transporter-like protein                                            |
|         | CK651932   | Cassava      | 3   |                                                                                                                |
|         | DB951894   | Cassava      | 3   | weakly similar to UniRef100_A8L5D0 Cluster: Peptidoglycan-binding domain 1 protein precursor                   |
|         | DV449432   | Cassava      | 3   | weakly similar to UniRef100_A9HMI2 Cluster: Transcriptional regulator Crp/Fnr family                           |
| miR390* | TC4022     | Cassava      | 3   | similar to UniRef100_A7P779 Cluster: Chromosome chr9 scaffold_7                                                |
|         | TC3526     | Cassava      | 3   | homologue to UniRef100_Q6V3B0 Cluster: Adenosine 5' phosphosulfate reductase                                   |
| miR393* | EC605492.1 | rubber tree  | 3   | A232 YLX600 Hevea brasiliensis cDNA clone A232 5'                                                              |
|         | TC4642     | Leafy spurge | 3   | similar to UniRef100_A7PI01 Cluster: Chromosome chr13 scaffold_17                                              |
|         | TC9253     | Leafy spurge | 3   | similar to UniRef100_A7Q587 Cluster: Chromosome undetermined scaffold_52                                       |
|         | DV441769   | Cassava      | 3   | similar to UniRef100_A7XEE1 Cluster: 3-dehydroquinate dehydratase/shikimate 5-dehydrogenase                    |
|         | DV450102   | Cassava      | 3   | similar to UniRef100_A7PH39 Cluster: Chromosome chr17 scaffold_16                                              |
|         | TC5616     | Cassava      | 3   | similar to UniRef100_A7P5K3 Cluster: Chromosome chr4 scaffold_6                                                |
|         | TC9357     | Cassava      | 3   | similar to UniRef100_A7PH39 Cluster: Chromosome chr17 scaffold_16                                              |
|         | TC9796     | Cassava      | 3   | similar to UniRef100_A7PH39 Cluster: Chromosome chr17 scaffold_16                                              |
| miR395* | DV154896   | Leafy spurge | 2.5 | similar to UniRef100_Q94IJ3 Cluster: Somatic embryogenesis receptor-like kinase 3                              |
|         | DV150145   | Leafy spurge | 3   | similar to UniRef100_A7PDP8 Cluster: Chromosome chr11 scaffold_13                                              |
|         | DB933203   | Cassava      | 3   | UniRef100_Q14738-2 Cluster: Isoform Delta                                                                      |
| miR396* | GR305850.1 | rubber tree  | 2.5 | TPD_SSH_BAI189 Transcripts of bark tissues of healthy trees Hevea brasiliensis cDNA similar to UNKNOWN PROTEIN |
|         | DB942674   | Cassava      | 2.5 | similar to UniRef100_A5I8L8 Cluster: ACC oxidase 2                                                             |
|         | DV146409   | Leafy spurge | 3   | similar to UniRef100_Q19N58 Cluster: Na <sup>+</sup> /H <sup>+</sup> antiporter                                |
|         | DV149646   | Leafy spurge | 3   | weakly similar to UniRef100_A7QFW2 Cluster: Chromosome undetermined scaffold_89                                |
|         | DV152598   | Leafy spurge | 3   | weakly similar to UniRef100_A2Q513 Cluster: Pentatricopeptide repeat                                           |
|         | TC1422     | Leafy spurge | 3   | similar to UniRef100_A7Q173 Cluster: Chromosome chr10 scaffold_43                                              |

|         |            |              |     |                                                                                             |
|---------|------------|--------------|-----|---------------------------------------------------------------------------------------------|
|         | TC7054     | Leafy spurge | 3   | similar to UniRef100_A7PWD5 Cluster: Chromosome chr8 scaffold_34                            |
|         | DV152598   | Leafy spurge | 3   | weakly similar to UniRef100_A2Q513 Cluster: Pentatricopeptide repeat                        |
|         | TC10498    | Leafy spurge | 3   | similar to UniRef100_A7PL65 Cluster: Chromosome chr7 scaffold_20                            |
|         | DB952678   | Cassava      | 3   | weakly similar to UniRef100_A7PL76 Cluster: Chromosome chr7 scaffold_20                     |
|         | TC2458     | Cassava      | 3   | homologue to UniRef100_P34788 Cluster: 40S ribosomal protein S18                            |
|         | TC8807     | Cassava      | 3   |                                                                                             |
|         | DB922509   | Cassava      | 3   | similar to UniRef100_A7NX81 Cluster: Chromosome chr5 scaffold_2                             |
|         | TC12018    | Cassava      | 3   | similar to UniRef100_A6WVL2 Cluster: Phosphomethylpyrimidine kinase precursor               |
|         | DB931529   | Cassava      | 3   | similar to UniRef100_A7P0K7 Cluster: Chromosome chr19 scaffold_4                            |
|         | DB943779   | Cassava      | 3   | weakly similar to UniRef100_A7QAX1 Cluster: Chromosome chr5 scaffold_72                     |
|         | DR086084   | Cassava      | 3   | similar to UniRef100_A5YAI9 Cluster: CBL-interacting protein kinase                         |
|         | FF380927   | Cassava      | 3   | similar to UniRef100_A7QNG3 Cluster: Chromosome chr2 scaffold_132                           |
|         | TC2291     | Cassava      | 3   | similar to UniRef100_A0MNL4 Cluster: CBL-interacting protein kinase 6                       |
|         | DB931529   | Cassava      | 3   | similar to UniRef100_A7P0K7 Cluster: Chromosome chr19 scaffold_4                            |
| miR398* | TC11498    | Cassava      | 3   | similar to UniRef100_Q9LVA0 Cluster: Dbj BAA90612.1                                         |
| miR447* | TC9834     | Leafy spurge | 1.5 | similar to UniRef100_A7NZK6 Cluster: Chromosome chr6 scaffold_3                             |
|         | EC602884.1 | rubber tree  | 2.5 | W903 YLX600 Hevea brasiliensis cDNA clone W903 5'                                           |
|         | EC607217.1 | rubber tree  | 2.5 | Y18B12 YLX600 Hevea brasiliensis cDNA clone Y18B12 5'                                       |
|         | DV134116   | Leafy spurge | 2.5 | similar to UniRef100_A7Q4J0 Cluster: Chromosome chr9 scaffold_49                            |
|         | TC2432     | Leafy spurge | 2.5 | similar to UniRef100_Q9LM04 Cluster: Cyclic nucleotide-gated calmodulin-binding ion channel |
|         | CK644694   | Cassava      | 2.5 | similar to UniRef100_Q8H6U1 Cluster: Cyclic nucleotide-gated channel C                      |
|         | DB933654   | Cassava      | 2.5 | similar to UniRef100_Q3EAH8 Cluster: Uncharacterized protein At3g59040.2                    |
|         | DV126855   | Leafy spurge | 3   | similar to UniRef100_A7NZA7 Cluster: Chromosome chr6 scaffold_3                             |
|         | DV141825   | Leafy spurge | 3   | weakly similar to UniRef100_A7QH05 Cluster: Chromosome chr3 scaffold_95                     |
|         | DV142104   | Leafy spurge | 3   | similar to UniRef100_A5BKY3 Cluster: Lipoxigenase                                           |
|         | DV152012   | Leafy spurge | 3   | similar to UniRef100_A7QWJ1 Cluster: Chromosome chr10 scaffold_204                          |
|         | TC2597     | Leafy spurge | 3   | weakly similar to UniRef100_A7PRR6 Cluster: Chromosome chr14 scaffold_27                    |
|         | TC2912     | Leafy spurge | 3   | similar to UniRef100_A7PLZ4 Cluster: Chromosome chr14 scaffold_21                           |
|         | TC6707     | Leafy spurge | 3   | similar to UniRef100_A5B0X9 Cluster: Delta-aminolevulinic acid dehydratase                  |
|         | TC912      | Leafy spurge | 3   | similar to UniRef100_A7NZA7 Cluster: Chromosome chr6 scaffold_3                             |
|         | DB944783   | Cassava      | 3   | similar to UniRef100_A7PAR9 Cluster: Chromosome chr14 scaffold_9                            |
|         | TC486      | Cassava      | 3   | similar to UniRef100_Q9M385 Cluster: 50S ribosomal protein L17 chloroplast precursor        |
| miR482* | DV144269   | Leafy spurge | 3   | similar to UniRef100_Q6K7S7 Cluster: Cytochrome c biogenesis protein-like                   |
|         | TC10327    | Leafy spurge | 3   |                                                                                             |

|          |            |              |     |                                                                                                              |
|----------|------------|--------------|-----|--------------------------------------------------------------------------------------------------------------|
|          | TC2856     | Leafy spurge | 3   |                                                                                                              |
|          | TC7081     | Leafy spurge | 3   |                                                                                                              |
|          | DV144269   | Leafy spurge | 3   | similar to UniRef100_Q6K7S7 Cluster: Cytochrome c biogenesis protein-like                                    |
|          | TC10327    | Leafy spurge | 3   |                                                                                                              |
|          | TC2856     | Leafy spurge | 3   |                                                                                                              |
|          | TC7081     | Leafy spurge | 3   |                                                                                                              |
|          | CK650170   | Cassava      | 3   | similar to UniRef100_UPI0000162EFA Cluster: leucine-rich repeat family protein                               |
|          | CK650170   | Cassava      | 3   | similar to UniRef100_UPI0000162EFA Cluster: leucine-rich repeat family protein                               |
| miR1510* | FF534613   | Cassava      | 3   | homologue to UniRef100_Q40528 Cluster: Nt-rab7c protein                                                      |
|          | TC5752     | Cassava      | 3   | similar to UniRef100_A7P339 Cluster: Methionine aminopeptidase                                               |
| miR3623* | EC607218.1 | rubber tree  | 1.5 | A952 YLX600 Hevea brasiliensis cDNA clone A952 5'                                                            |
|          | TC5268     | Leafy spurge | 2   | similar to UniRef100_A7PA49 Cluster: Chromosome chr14 scaffold_9                                             |
|          | DV156491   | Leafy spurge | 2.5 | homologue to UniRef100_A5BCC0 Cluster: Histone H2B                                                           |
|          | TC6059     | Leafy spurge | 2.5 | similar to UniRef100_A7P841 Cluster: Chromosome chr3 scaffold_8                                              |
|          | DV126152   | Leafy spurge | 3   | UniRef100_Q7MZY7 Cluster: Glycerophosphoryl diester phosphodiesterase periplasmic                            |
|          | DB948724   | Cassava      | 3   |                                                                                                              |
|          | TC8431     | Cassava      | 3   | homologue to UniRef100_Q41141 Cluster: Pyrophosphate--fructose 6-phosphate 1-phosphotransferase subunit beta |
| miR3630* | TC2080     | Leafy spurge | 3   | similar to UniRef100_A7Q8K6 Cluster: Chromosome chr5 scaffold_64                                             |
|          | TC4123     | Leafy spurge | 3   | weakly similar to UniRef100_A7QLR0 Cluster: Chromosome chr18 scaffold_121                                    |
|          | TC6758     | Leafy spurge | 3   | similar to UniRef100_A7PLH1 Cluster: Chromosome chr7 scaffold_20                                             |
|          | DB926422   | Cassava      | 3   | similar to UniRef100_A7Q1J8 Cluster: Chromosome chr7 scaffold_44                                             |
|          | DB940413   | Cassava      | 3   | similar to UniRef100_A7QQS7 Cluster: Chromosome undetermined scaffold_144                                    |
|          | DB948752   | Cassava      | 3   | similar to UniRef100_Q8L891 Cluster: AT4g35790/F4B14_60                                                      |
|          | TC11937    | Cassava      | 3   | similar to UniRef100_A7PJE1 Cluster: Chromosome chr12 scaffold_18                                            |
| miR3633* | CK644695   | Cassava      | 3   | homologue to UniRef100_A6MUT4 Cluster: GDP-mannose pyrophosphorylase                                         |
|          | TC6655     | Cassava      | 3   | similar to UniRef100_Q8L7U4 Cluster: AT4g02450/T14P8_5                                                       |
|          | TC8438     | Cassava      | 3   |                                                                                                              |

# Target Acc.: target accession numbers. For the target genes predicted from rubber tree ESTs, the accession numbers are from Genbank. The accession numbers for the other targets are from Euphorbia esula (leafy spurge) DFCI gene index release 1 or Manihot esculenta (cassava) DFCI gene index release 1.

& Database: the database from which the targets were predicted.

\* Expectation: the scores given by the target prediction program. In the 0-5 scale, a score of 0-2 represents a stringent cutoff.
