# Supplementary material
Source: PubMed Central journal article supplement (PMC3405184)
Supplement: NIHMS365062-supplement-7.pdf [file NIHMS365062-supplement-7.pdf]

**Supplemental Table 5. Predicted targets of novel rubber tree miRNAs**

| miRNA_ID   | Target Acc.# | Database <sup>®</sup> | Expectation* | Target Description                                                                      |
|------------|--------------|-----------------------|--------------|-----------------------------------------------------------------------------------------|
| hbr-cand01 | DV143305     | Leafy spurge          | 3            | similar to UniRef100_Q7QEF9 Cluster: AGAP000673-PA                                      |
|            | TC6408       | Leafy spurge          | 3            | similar to UniRef100_A7PULO Cluster                                                     |
| hbr-cand02 | TC3505       | Leafy spurge          | 1            | similar to UniRef100_P46489 Cluster: Malate dehydrogenase [NADP], chloroplast precursor |
|            | EC606162     | rubber tree           | 2.5          | Y33E01 YLX600 Hevea brasiliensis cDNA clone Y33E01 5', mRNA sequence                    |
|            | TC12042      | Cassava               | 3            | similar to UniRef100_A7R311 Cluster                                                     |
|            | TC1487       | Leafy spurge          | 3            | similar to UniRef100_A7QD66 Cluster                                                     |
| hbr-cand03 | TC2597       | Cassava               | 3            | similar to UniRef100_Q5NE17 Cluster: Malate dehydrogenase                               |
|            | BM259988     | Cassava               | 2.5          | homologue to UniRef100_A7PJV3 Cluster                                                   |
|            | DB945786     | Cassava               | 2.5          | homologue to UniRef100_A7QQL7 Cluster                                                   |
|            | DB941102     | Cassava               | 2.5          | homologue to UniRef100_A7QQL7 Cluster                                                   |
|            | TC9050       | Cassava               | 2.5          | similar to UniRef100_A7PZQ8 Cluster                                                     |
|            | DV450137     | Cassava               | 3            |                                                                                         |
|            | TC1511       | Leafy spurge          | 3            | homologue to UniRef100_A7PW42 Cluster                                                   |
|            | TC6326       | Leafy spurge          | 2.5          | similar to UniRef100_A7PC11 Cluster                                                     |
| hbr-cand04 | DV155595     | Leafy spurge          | 3            | similar to UniRef100_A7P9Y9 Cluster                                                     |
|            | DB936606     | Cassava               | 2.5          |                                                                                         |
| hbr-cand05 | DB947720     | Cassava               | 3            | weakly similar to UniRef100_A7P423 Cluster                                              |
|            | CK643967     | Cassava               | 3            | similar to UniRef100_A2Q4Q8 Cluster: Zinc finger, RING-type                             |
|            | DV137561     | Leafy spurge          | 3            | similar to UniRef100_A7PQV3 Cluster                                                     |
|            | TC2090       | Leafy spurge          | 2            | similar to UniRef100_Q84VX9 Cluster                                                     |
| hbr-cand06 | TC5522       | Leafy spurge          | 2            | similar to UniRef100_O80341 Cluster: Ethylene-responsive transcription factor 5         |
|            | DB929814     | Cassava               | 2.5          | similar to UniRef100_Q9LS65 Cluster: Gb AAD25622.1                                      |
|            | TC4909       | Cassava               | 2.5          | similar to UniRef100_A7R1E8 Cluster                                                     |
|            | TC11928      | Cassava               | 2.5          | weakly similar to UniRef100_A7NX60 Cluster                                              |
|            | TC194        | Leafy spurge          | 2.5          | weakly similar to UniRef100_A7QD41 Cluster                                              |

|            |          |              |     |                                                                               |
|------------|----------|--------------|-----|-------------------------------------------------------------------------------|
|            | TC10089  | Leafy spurge | 2.5 | weakly similar to UniRef100_A7QF30 Cluster                                    |
|            | TC2628   | Leafy spurge | 2.5 |                                                                               |
|            | TC207    | Leafy spurge | 2.5 | similar to UniRef100_Q8LBH4 Cluster: Ids4-like protein                        |
|            | DB947420 | Cassava      | 3   | similar to UniRef100_A7NTP8 Cluster                                           |
|            | FF536189 | Cassava      | 3   | similar to UniRef100_A7QW82 Cluster                                           |
|            | TC4755   | Cassava      | 3   | homologue to UniRef100_A9PL14 Cluster: Alpha-tubulin                          |
|            | TC779    | Cassava      | 3   | similar to UniRef100_A7PH89 Cluster                                           |
|            | DV152884 | Leafy spurge | 3   |                                                                               |
|            | DV150096 | Leafy spurge | 3   | similar to UniRef100_A7QHL7 Cluster                                           |
|            | TC10535  | Leafy spurge | 3   | similar to UniRef100_A7QS76 Cluster                                           |
|            | DV135330 | Leafy spurge | 3   |                                                                               |
| hbr-cand07 | CK645365 | Cassava      | 2.5 | similar to UniRef100_Q10DK1 Cluster: Protein kinase domain containing protein |
|            | DV457564 | Cassava      | 2.5 | weakly similar to UniRef100_A7PNG6 Cluster                                    |
|            | TC2604   | Cassava      | 3   | homologue to UniRef100_A2Q4X4 Cluster: Epsin, N-terminal                      |
|            | TC10541  | Leafy spurge | 3   |                                                                               |
| hbr-cand08 | TC7718   | Cassava      | 2   | similar to UniRef100_Q94A20 Cluster: Protein FBL4                             |
|            | DB952123 | Cassava      | 2   | similar to UniRef100_Q680F9 Cluster: MRNA, complete cds, clone: RAFL22-56-M10 |
|            | TC7516   | Cassava      | 2   | weakly similar to UniRef100_A0EG84 Cluster                                    |
|            | TC9663   | Cassava      | 2.5 | homologue to UniRef100_A1EC31 Cluster: CLAVATA3/ESR-related protein           |
|            | TC3841   | Cassava      | 2.5 | weakly similar to UniRef100_Q1MS46 Cluster: Maltose O-acetyltransferase       |
|            | DV449658 | Cassava      | 2.5 | similar to UniRef100_A7Q2N1 Cluster                                           |
|            | DV126292 | Leafy spurge | 2.5 |                                                                               |
|            | TC6617   | Leafy spurge | 2.5 |                                                                               |
|            | DV151844 | Leafy spurge | 2.5 | similar to UniRef100_A0CX29 Cluster                                           |
|            | EC604249 | rubber tree  | 2.5 | A44 YLX600 Hevea brasiliensis cDNA clone A44 5', mRNA sequence                |
|            | TC7658   | Cassava      | 3   | similar to UniRef100_Q94BX3 Cluster: AT4g25670/L73G19_50                      |
|            | FF534706 | Cassava      | 3   | similar to UniRef100_A7NTI6 Cluster                                           |

|            |          |              |     |                                                                                    |
|------------|----------|--------------|-----|------------------------------------------------------------------------------------|
|            | DB932290 | Cassava      | 3   | UniRef100_A7R1W0 Cluster                                                           |
|            | TC7274   | Cassava      | 3   |                                                                                    |
|            | TC9647   | Cassava      | 3   | similar to UniRef100_A9TSJ9 Cluster: Predicted protein                             |
|            | TC3566   | Cassava      | 3   | similar to UniRef100_A7QMH9 Cluster                                                |
|            | DV447643 | Cassava      | 3   | weakly similar to UniRef100_Q9H4G1 Cluster: Cystatin-9-like precursor              |
|            | CK640990 | Cassava      | 3   | UniRef100_Q5LRD3 Cluster: Diaminopropionate ammonia-lyase                          |
|            | TC214    | Cassava      | 3   | similar to UniRef100_Q6L4B1 Cluster: EF hand family protein                        |
|            | DV448335 | Cassava      | 3   | similar to UniRef100_Q6L4B1 Cluster: EF hand family protein                        |
|            | TC3544   | Cassava      | 3   | similar to UniRef100_Q7RJ87 Cluster: Malate dehydrogenase                          |
|            | DV151070 | Leafy spurge | 3   |                                                                                    |
|            | DV122719 | Leafy spurge | 3   | similar to UniRef100_UPI000036F3DC Cluster: PREDICTED: sarcospan                   |
|            | DV150240 | Leafy spurge | 3   | similar to UniRef100_A7PYE0 Cluster                                                |
|            | DV124243 | Leafy spurge | 3   | homologue to UniRef100_A7QT33 Cluster                                              |
|            | TC1956   | Leafy spurge | 3   | similar to UniRef100_A9V7C9 Cluster: Predicted protein                             |
|            | TC5303   | Leafy spurge | 3   | similar to UniRef100_A7QBT8 Cluster                                                |
|            | DV149391 | Leafy spurge | 3   | weakly similar to UniRef100_Q9FJ12 Cluster                                         |
|            | DV155430 | Leafy spurge | 3   | weakly similar to UniRef100_Q9FJ12 Cluster                                         |
|            | TC10681  | Leafy spurge | 3   |                                                                                    |
|            | TC9110   | Leafy spurge | 3   | similar to UniRef100_Q0E424 Cluster: Os02g0140100 protein                          |
|            | TC7558   | Leafy spurge | 3   | similar to UniRef100_A7Q218 Cluster                                                |
|            | TC5692   | Leafy spurge | 3   | similar to UniRef100_P52413 Cluster: Acyl carrier protein 3, chloroplast precursor |
|            | EC609505 | rubber tree  | 3   | LatexY13D05 YLX600 Hevea brasiliensis cDNA clone LatexY13D05 5', mRNA sequence     |
| hbr-cand09 | DB944810 | Cassava      | 3   | similar to UniRef100_A7PY52 Cluster                                                |
| hbr-cand10 | TC11386  | Cassava      | 2   | weakly similar to UniRef100_A7PF66 Cluster                                         |
|            | TC9174   | Cassava      | 2.5 | similar to UniRef100_Q39079 Cluster: Chaperone protein dnaJ 13                     |
|            | DV448197 | Cassava      | 3   | weakly similar to UniRef100_Q1IRM0 Cluster: Pyrroline-5-carboxylate reductase      |
|            | DV128909 | Leafy spurge | 3   | similar to UniRef100_A7NYW5 Cluster                                                |

|            |          |              |     |                                                                                     |
|------------|----------|--------------|-----|-------------------------------------------------------------------------------------|
|            | TC5750   | Leafy spurge | 3   | homologue to UniRef100_A7NYW5 Cluster                                               |
|            | DV141339 | Leafy spurge | 3   | similar to UniRef100_Q66Q67 Cluster: Homeodomain protein HOX3                       |
|            | EC606284 | rubber tree  | 3   | A364 YLX600 Hevea brasiliensis cDNA clone A364 5', mRNA sequence                    |
|            | EC600724 | rubber tree  | 3   | Y89D10 YLX600 Hevea brasiliensis cDNA clone Y89D10 5', mRNA sequence                |
|            | EC606931 | rubber tree  | 3   | Y10H05 YLX600 Hevea brasiliensis cDNA clone Y10H05 5', mRNA sequence                |
|            | EC609097 | rubber tree  | 3   | Y20E01 YLX600 Hevea brasiliensis cDNA clone Y20E01 5', mRNA sequence                |
|            | EC606501 | rubber tree  | 3   | Y61C06 YLX600 Hevea brasiliensis cDNA clone Y61C06 5', mRNA sequence                |
|            | EC604245 | rubber tree  | 3   | Y63G02 YLX600 Hevea brasiliensis cDNA clone Y63G02 5', mRNA sequence                |
|            | EC605511 | rubber tree  | 3   | Y36C01 YLX600 Hevea brasiliensis cDNA clone Y36C01 5', mRNA sequence                |
| hbr-cand11 | DB938820 | Cassava      | 2   | weakly similar to UniRef100_A7QLW0 Cluster                                          |
|            | TC5377   | Cassava      | 3   | homologue to UniRef100_Q94DM8 Cluster: Probable ubiquitin-fold modifier 1 precursor |
|            | DV154369 | Leafy spurge | 3   | similar to UniRef100_A7PI18 Cluster                                                 |
| hbr-cand12 | DV137624 | Leafy spurge | 2.5 | weakly similar to UniRef100_A7NW61 Cluster                                          |
|            | TC9374   | Leafy spurge | 3   | similar to UniRef100_A7QJB6 Cluster                                                 |
| hbr-cand13 | TC10348  | Cassava      | 2.5 | weakly similar to UniRef100_A7QUC4 Cluster                                          |
|            | DV449231 | Cassava      | 2.5 |                                                                                     |
|            | DV131332 | Leafy spurge | 3   | weakly similar to UniRef100_A2R1R2 Cluster                                          |
|            | DV144220 | Leafy spurge | 3   | UniRef100_A6ZZ69 Cluster: Down-regulator of invasive growth                         |
|            | TC1168   | Leafy spurge | 3   | similar to UniRef100_Q38M74 Cluster: Brittle 1 protein-like                         |
| hbr-cand14 | DB950399 | Cassava      | 3   | homologue to UniRef100_A7PV61 Cluster                                               |
| hbr-cand15 | DB929249 | Cassava      | 3   |                                                                                     |
|            | TC2014   | Cassava      | 3   | similar to UniRef100_A7QNF6 Cluster                                                 |
|            | TC9999   | Leafy spurge | 3   | similar to UniRef100_A7QMV3 Cluster                                                 |
| hbr-cand16 | TC8347   | Leafy spurge | 1.5 | similar to UniRef100_A7PHI8 Cluster                                                 |
|            | DB952942 | Cassava      | 2.5 | homologue to UniRef100_Q3EC78 Cluster                                               |
|            | TC11068  | Cassava      | 2.5 | homologue to UniRef100_Q9ZTV4 Cluster: COP1                                         |
|            | TC2387   | Cassava      | 3   | similar to UniRef100_A7R237 Cluster                                                 |

|            |          |              |     |                                                                                           |
|------------|----------|--------------|-----|-------------------------------------------------------------------------------------------|
|            | DV448422 | Cassava      | 3   | similar to UniRef100_Q84VZ3 Cluster                                                       |
|            | GR421465 | Cassava      | 3   | homologue to UniRef100_Q8H1N8 Cluster: At1g20880/F9H16_14                                 |
| hbr-cand17 | DV154630 | Leafy spurge | 2   | similar to UniRef100_A7Q4M5 Cluster                                                       |
|            | TC2669   | Leafy spurge | 2   |                                                                                           |
|            | TC5419   | Cassava      | 2.5 | homologue to UniRef100_A7Q9V9 Cluster                                                     |
|            | DB935017 | Cassava      | 2.5 | homologue to UniRef100_A5AJ03 Cluster: Phosphoribosylformylglycinamide cyclo-ligase       |
|            | BM259772 | Cassava      | 2.5 | weakly similar to UniRef100_A7PXL8 Cluster                                                |
|            | DV136631 | Leafy spurge | 2.5 | similar to UniRef100_A7Q421 Cluster                                                       |
|            | DV157275 | Leafy spurge | 2.5 | similar to UniRef100_A7Q421 Cluster                                                       |
|            | DV136981 | Leafy spurge | 2.5 | similar to UniRef100_A7PZJ0 Cluster                                                       |
|            | DV444142 | Cassava      | 3   | similar to UniRef100_A7P3C7 Cluster                                                       |
|            | TC5281   | Cassava      | 3   | homologue to UniRef100_A7NZ90 Cluster                                                     |
|            | TC3085   | Cassava      | 3   | similar to UniRef100_Q84UH4 Cluster: Dehydroascorbate reductase                           |
|            | TC247    | Cassava      | 3   | similar to UniRef100_Q84UH4 Cluster: Dehydroascorbate reductase                           |
|            | DV142222 | Leafy spurge | 3   |                                                                                           |
|            | TC551    | Leafy spurge | 3   | weakly similar to UniRef100_A7QPC2 Cluster                                                |
|            | DV138595 | Leafy spurge | 3   | similar to UniRef100_A7PL18 Cluster                                                       |
|            | DV143108 | Leafy spurge | 3   | similar to UniRef100_Q0IY26 Cluster: Os10g0377300 protein                                 |
|            | TC2262   | Leafy spurge | 3   | similar to UniRef100_A7PZJ0 Cluster                                                       |
|            | EC608350 | rubber tree  | 3   | Y41G09 YLX600 Hevea brasiliensis cDNA clone Y41G09 5', mRNA sequence                      |
| hbr-cand19 | TC9479   | Cassava      | 2.5 | similar to UniRef100_A7P1K0 Cluster                                                       |
|            | DB945615 | Cassava      | 3   |                                                                                           |
|            | DB932347 | Cassava      | 3   | similar to UniRef100_A4TKN1 Cluster: Membrane protein                                     |
|            | TC2094   | Cassava      | 3   | homologue to UniRef100_A7P6F6 Cluster                                                     |
|            | TC10890  | Cassava      | 3   | similar to UniRef100_Q94KD3 Cluster: At1g71270/F3I17_8                                    |
|            | TC618    | Cassava      | 3   | similar to UniRef100_Q41249 Cluster: Protochlorophyllide reductase, chloroplast precursor |
|            | TC6513   | Cassava      | 3   | homologue to UniRef100_Q9LKH8 Cluster: NADPH-protochlorophyllide oxidoreductase           |

|            |          |              |     |                                                                                                                             |
|------------|----------|--------------|-----|-----------------------------------------------------------------------------------------------------------------------------|
|            | TC4219   | Cassava      | 3   | homologue to UniRef100_Q9LKH8 Cluster: NADPH-protochlorophyllide oxidoreductase                                             |
|            | DB920759 | Cassava      | 3   | similar to UniRef100_A7P1K0 Cluster                                                                                         |
|            | DV132789 | Leafy spurge | 3   | homologue to UniRef100_Q9LKJ2 Cluster: Phosphoglycerate kinase                                                              |
|            | DV137857 | Leafy spurge | 3   | homologue to UniRef100_A7BVP1 Cluster: Indole-3-glycerol-phosphate synthase                                                 |
|            | TC8254   | Leafy spurge | 3   | similar to UniRef100_Q41249 Cluster: Protochlorophyllide reductase, chloroplast precursor                                   |
|            | TC1518   | Leafy spurge | 3   | weakly similar to UniRef100_A7NX60 Cluster                                                                                  |
| hbr-cand20 | DV141266 | Leafy spurge | 2.5 | similar to UniRef100_UPI00006D02CD Cluster: ATPase histidine kinase- DNA gyrase B- and HSP90-like domain containing protein |
|            | TC2517   | Leafy spurge | 2.5 | similar to UniRef100_Q84L32-2 Cluster: Isoform 2 of Q84L32                                                                  |
|            | TC5265   | Cassava      | 3   | similar to UniRef100_A7P102 Cluster                                                                                         |
|            | EC604730 | rubber tree  | 3   | Y77F08 YLX600 Hevea brasiliensis cDNA clone Y77F08 5', mRNA sequence                                                        |
| hbr-cand18 | DV448675 | Cassava      | 3.5 | similar to UniRef100_A7Q8K6 Cluster                                                                                         |
|            | DV444891 | Cassava      | 3.5 | UniRef100_A0C6T1 Cluster                                                                                                    |
|            | DB938590 | Cassava      | 3.5 | similar to UniRef100_A7QHW8 Cluster                                                                                         |
|            | TC9189   | Leafy spurge | 3.5 | similar to UniRef100_Q4JLU9 Cluster: Homeodomain protein Msx                                                                |
|            | DV137655 | Leafy spurge | 3.5 | similar to UniRef100_Q9LSH1 Cluster: Dihydroxyacetone/glycerone kinase-like protein                                         |
|            | TC3439   | Leafy spurge | 3.5 | similar to UniRef100_P93713 Cluster: PETHy;ZPT2-5                                                                           |
|            | DB922262 | Cassava      | 4   | similar to UniRef100_Q9LHE8 Cluster                                                                                         |
|            | DB931629 | Cassava      | 4   | similar to UniRef100_Q9LHE8 Cluster                                                                                         |
|            | TC2624   | Cassava      | 4   | similar to UniRef100_A0T2N9 Cluster: Neoxanthin cleavage enzyme-like protein                                                |
|            | DB937821 | Cassava      | 4   | UniRef100_P59229 Cluster: Vacuolar ATP synthase 16 kDa proteolipid subunit 4                                                |
|            | TC1265   | Cassava      | 4   | UniRef100_P59229 Cluster: Vacuolar ATP synthase 16 kDa proteolipid subunit 4                                                |
|            | DV131573 | Leafy spurge | 4   |                                                                                                                             |
|            | TC1007   | Leafy spurge | 4   | homologue to UniRef100_A7Q4Z2 Cluster                                                                                       |
|            | TC8099   | Leafy spurge | 4   | similar to UniRef100_A7Q494 Cluster                                                                                         |
|            | DV136929 | Leafy spurge | 4   | weakly similar to UniRef100_Q12CS9 Cluster: Homoserine kinase                                                               |
|            | DV126560 | Leafy spurge | 4   |                                                                                                                             |
|            | TC3480   | Leafy spurge | 4   | similar to UniRef100_A7NVH8 Cluster                                                                                         |

|  |          |             |   |                                                                                                                                       |
|--|----------|-------------|---|---------------------------------------------------------------------------------------------------------------------------------------|
|  | EC604281 | rubber tree | 4 | Y49C02 YLX600 Hevea brasiliensis cDNA clone Y49C02 5'                                                                                 |
|  | EC600306 | rubber tree | 4 | Y69A01 YLX600 Hevea brasiliensis cDNA clone Y69A01 5'                                                                                 |
|  | GR305629 | rubber tree | 4 | TPD_SSH_BC126 TPD responsive transcripts of Hevea brasiliensis (TPD affected bark) Hevea brasiliensis cDNA similar to unknown protein |
|  | EC609905 | rubber tree | 4 | LatexY13D12 YLX600 Hevea brasiliensis cDNA clone LatexY13D12 5', mRNA sequence                                                        |

# Target Acc.: target accession numbers. For the target genes predicted from rubber tree ESTs, the accession numbers are from Genbank. The accession numbers for the other targets are from *Euphorbia esula* (leafy spurge) DFCI gene index release 1 or *Manihot esculenta* (cassava) DFCI gene index release 1.

& Database: the database from which the targets were predicted.

\* Expectation: the scores given by the target prediction program. In the 0-5 scale, a score of 0-2 represents a stringent cutoff. For all miRNAs except for hbr-cand18, the score range was set to 0-3 for the prediction. For hbr-cand18, the range was set to 0-4, since no targets were predicted in the 0-3 range.
