# Supplementary material
Source: PubMed Central journal article supplement (PMC3405184)
Supplement: NIHMS365062-supplement-8.pdf [file NIHMS365062-supplement-8.pdf]

**Table S6.** Primer and probe sequences for miRNA detection

|            |                             |                                                                               |
|------------|-----------------------------|-------------------------------------------------------------------------------|
| hbr-cand02 | RT primer<br>Forward primer | GTCGTATCCAGTGCAGGGTCCGAGGTATTCGCACTGGATACGACTCACTC<br>GGCTGCGAAATGGGTGGATGG   |
| hbr-cand05 | RT primer<br>Forward primer | GTCGTATCCAGTGCAGGGTCCGAGGTATTCGCACTGGATACGACCTTCTT<br>TTCCTTAGATGGGTGGCTGGGC  |
| hbr-cand12 | RT primer<br>Forward primer | GTCGTATCCAGTGCAGGGTCCGAGGTATTCGCACTGGATACGACAGTATC<br>GCTCTGCTCAGCCGTAACGATG  |
| hbr-cand13 | RT primer<br>Forward primer | GTCGTATCCAGTGCAGGGTCCGAGGTATTCGCACTGGATACGACCATGTG<br>CTGCTGTTGGAGCGACCTGAGAT |
| Universal  | Reverse primer              | GTGCAGGGTCCGAGGT                                                              |
| miR156     | Antisense probe             | GTGCTCACTCTTCTGTCA                                                            |
| miR159     | Antisense probe             | TAGAGCTCCCTTCAATCCAAA                                                         |
| miR160     | Antisense probe             | TGGCATAACAGGGAGCCAGGCA                                                        |
| miR162     | Antisense probe             | CTGGATGCAGAGGTTTATCGA                                                         |
| miR164     | Antisense probe             | TGCACGTGCCCTGCTTCTCCA                                                         |
| miR166     | Antisense probe             | GGGGAATGAAGCCTGGTCCGA                                                         |
| miR167     | Antisense probe             | TAGATCATGTTGGCAGTTTCA                                                         |
| miR168     | Antisense probe             | TTCCCGACCTGCACCAAGCGA                                                         |
| miR169     | Antisense probe             | TCGGCAAGTCATCCTTGGCTG                                                         |
| miR171     | Antisense probe             | CGTGATATTGGCACGGCTCAA                                                         |
| miR172     | Antisense probe             | ATGCAGCATCATCAAGATTCT                                                         |
| miR319     | Antisense probe             | GGGAGCTCCCTTCAGTCCAA                                                          |
| miR390     | Antisense probe             | GGCGCTATCCCTCCTGAGCTT                                                         |
| miR393     | Antisense probe             | GATCAATGCGATCCCTTTGGA                                                         |
| miR395     | Antisense probe             | GAGTTCCCCCAAACACTTCAG                                                         |
| miR398     | Antisense probe             | AAGGGGTGACCTGAGAACACA                                                         |
| miR1511    | Antisense probe             | CATGGTATCAGAGCCTGGTT                                                          |
| miR403     | Antisense probe             | AATCTAAGTGCGTGTGTTGAGC                                                        |
| miR408     | Antisense probe             | GCCAGGGAAGAGGCAGTGCAT                                                         |
| 5S rRNA    | Antisense probe             | GAGGGATGCAACACGAGGACTT                                                        |
